# Supplementary material for: Molecular Determinants of Lung Function Decline: A Multi- Level Analysis of Gene Expression
Source: Research Square preprint supplement (doi:10.21203/rs.3.rs-7292685/v1), 2025-08-19
Supplement: Supplementary file 2 [file 55727625548cb70db58fa77b.xlsx]

## Sheet: Table1_Characteristics
Table 1: Characteristics of the study population.
N=435	Units	Phase 2			Phase 3
		Mean	SD	Range	Mean	SD	Range
Age	Years	64.52	8.17	48.1 - 84.6	69.19	8.28	53-89.4
FEV1 post-BD	Liters	2.31	0.76	0.4 - 4.44	2.12	0.75	0.32-4.36
FEV1 % predicted	%	84.26	22.59	14.7-137.6	82.34	24.24	12.7 - 144.2
Neutrophils	%	58.26	9.56	25-91	60.02	9.64	19.3 - 93.9
Lymphocytes	%	30.5	9.03	7.0-59	28.25	9.27	2.6 - 78.9
Eosinophils	%	2.57	1.98	0-25	2.5	1.65	0-8.8
Monocytes	%	8.04	2.53	1-22.0	8.43	2.39	0-22
WBC	K/uL	6.84	1.98	2.8-18.9	6.83	1.97	2.3-22.6
ΔFEV1(Phase2-3)	ml/year	-40.98	56.46	-406 - 179
Pack Years of smoking		44	23.69	10-145	44.94	23.95	10-145
Phase2					Phase3
N=435	Units				N=435	Units
Gender (Male)	%	49			Gender (Male)	%	49
Former Smokers	%	67			Former Smokers	%	70
Race (non-Hispanic White)	%	74			Race (White)	%	74
Race (African American)	%	26			Race (African American)	%	26
Smoking status in phase 2-3	FF	FC	CF	CC
	278	12	25	120

## Sheet: Table2_Gene-Signature
Table 2: FEV1 decline gene signature association with COPD-related traits
Traits	Positive Gene Signature		Negative Gene Signature		Regression
	Beta	P.value	Beta	P.value
FEV1 at Phase 2 (ml)	310.82	1.46887e-18	-170.172	4.78639e-13	Linear
FEV1 at Phase 3 (ml)	310.35	2.12587e-11	-161.428	1.91316e-07	Linear
FEV1 Rapid Decline Phase1_Phase2 (<40ml/yr)	-0.270538	0.0117375	0.231036	0.0011986	Binary
FEV1 Rapid Decline Phase2- Phase 3 (<40ml/yr)	-0.376539	0.00891837	0.288868	0.0026398	Binary
FEV1 Rapid Decline Phase1- Phase3 (<40ml/yr)	-0.692633	3.01712e-06	0.358855	0.000267827	Binary
COPD case-control (Gold Stage 0 VS 2-4)	-1.06315	3.41435e-16	0.750931	1.02511e-17	Binary
COPD related Traits
Airway Wall Thickness (PI10)	-0.145955	1.50006e-06	0.12979	1.15999e-10	Linear
Severe Exacerbations	-1.18219	9.93763e-10	0.334315	0.00817441	Binary
Exacerbation Frequency	-0.259297	2.76318e-10	0.078725	0.00400925	Linear
% emphysema (-950HU)	-2.77632	1.83694e-09	1.80652	4.00847e-09	Linear
Change P1 to P2: Emphysema	-0.769379	0.000211593	0.474524	0.000634042	Linear
Validation (ECLIPSE)
FEV1 at baseline	360.243	4.88644e-05	-352.336	3.70824e-08	Linear
FEV1 at 1 year	333.501	0.000159954	-300.793	3.09067e-06	Linear
FEV1 at 2 years	329.826	0.000198311	-312.885	1.20483e-06	Linear
FEV1 at 3 years	294.179	0.00154099	-327.725	1.3528e-06	Linear
FEV1 Change ml/yr	4.67744	0.652054	-2.50318	0.743237	Linear
% emphysema (-950HU)	-4.48681	0.00748789	4.28444	0.000358831	Linear
Exacerbation Frequency	-0.734448	0.000309947	0.027288	0.853993	Linear
Airway Wall Thickness (Pi10)	-0.0178341	0.288785	0.0180362	0.439136	Linear

## Sheet: ST1_Models
ST1: Description of the models used for cross-sectional and longitudinal analyses
Analysis	Model	Number of subjects with complete data
Cross-Sectional Phase 2 & Phase 3	EXP ~ FEV1+ Age + Race + Hight + Gender + Current Smoking + Batch + WBC + %Neutrophils + %Lymphocytes + %Monocytes + %Eosinophils	435
FEV1 Change Phase2>Phase 3	EXP ~ Change_FEV1 + FEV1_Phase2 + Age + Race + Gender + Current Smoking + Batch + WBC + %Neutrophils + %Lymphocytes + %Monocytes + %Eosinophils	435
Longitudinal Phase2>Phase 3	EXP ~ Change_FEV1 + FEV1_Phase2 + Age + Race + Gender + Smoking Status + Batch + WBC + %Neutrophils + %Lymphocytes + %Monocytes + %Eosinophils	435

## Sheet: ST2_Phase2
ST2: Significant Genes (p-value < 0.05) Identified in Phase 2 Cross-Sectional Analysis of FEV1
ENSG	geneID	logFC	AveExpr	t	P.Value	adj.P.Val	B
ENSG00000154165	GPR15	-0.315721	4.75115	-4.59413	5.72862e-06	0.0389389	3.63406
ENSG00000154027	AK5	0.226927	3.22397	4.58036	6.09993e-06	0.0389389	3.39711
ENSG00000232810	TNF	-0.185426	1.51952	-4.26083	2.5079e-05	0.106728	1.87803
ENSG00000135108	FBXO21	0.0559824	5.0896	4.08823	5.19486e-05	0.165807	1.70371
ENSG00000282988		-0.188866	3.529	-3.93447	9.73062e-05	0.248462	1.11171
ENSG00000196352	CD55	0.125594	7.59099	3.85902	0.000131436	0.260967	0.890107
ENSG00000189233	NUGGC	-0.193437	2.5722	-3.80667	0.000161466	0.260967	0.579747
ENSG00000155016	CYP2U1	0.0939014	3.36259	3.80342	0.000163526	0.260967	0.644516
ENSG00000262766	RP11-196G11.4	-0.143584	0.748017	-3.61142	0.000340724	0.434698	-0.270779
ENSG00000114737	CISH	-0.148376	4.7745	-3.5723	0.000394169	0.434698	-0.0675728
ENSG00000069329	VPS35	0.0833949	7.13754	3.55943	0.000413405	0.434698	-0.115544
ENSG00000077684	JADE1	0.0597483	6.41366	3.54805	0.000431141	0.434698	-0.152699
ENSG00000091409	ITGA6	0.103436	6.33113	3.54091	0.000442631	0.434698	-0.175193
ENSG00000057252	SOAT1	0.0820482	6.36664	3.47198	0.000569327	0.518521	-0.395263
ENSG00000169252	ADRB2	-0.111799	5.34454	-3.45211	0.000611697	0.518521	-0.452788
ENSG00000136875	PRPF4	0.0647599	4.62073	3.4353	0.000649826	0.518521	-0.497934
ENSG00000130340	SNX9	0.0731278	4.75126	3.41036	0.000710512	0.533594	-0.575423
ENSG00000141385	AFG3L2	0.0581169	5.02599	3.37048	0.00081863	0.572347	-0.700872
ENSG00000095794	CREM	0.103218	2.79368	3.35923	0.000851774	0.572347	-0.75801
ENSG00000165092	ALDH1A1	0.129108	4.47174	3.32314	0.000966796	0.585973	-0.83748
ENSG00000144290	SLC4A10	0.315722	1.92472	3.30715	0.00102224	0.585973	-0.975796
ENSG00000157017	GHRL	-0.174105	1.26489	-3.23617	0.00130578	0.585973	-1.20802
ENSG00000145675	PIK3R1	0.0854551	7.37682	3.22642	0.00135	0.585973	-1.14273
ENSG00000204519	ZNF551	0.07065	4.37816	3.22121	0.00137419	0.585973	-1.13409
ENSG00000134954	ETS1	0.0688837	8.77428	3.2055	0.00144958	0.585973	-1.19473
ENSG00000100644	HIF1A	0.10083	7.44978	3.20093	0.00147219	0.585973	-1.2168
ENSG00000084234	APLP2	0.0778395	7.65434	3.19319	0.00151125	0.585973	-1.23803
ENSG00000161533	ACOX1	0.0855501	7.40042	3.18448	0.00155641	0.585973	-1.26459
ENSG00000095321	CRAT	-0.261017	2.69559	-3.173	0.00161777	0.585973	-1.27801
ENSG00000204020	LIPN	0.180796	4.68447	3.16897	0.00163986	0.585973	-1.29099
ENSG00000105968	H2AFV	0.0501509	6.51115	3.16746	0.00164818	0.585973	-1.31666
ENSG00000256039	RP11-291B21.2	-0.261004	2.21062	-3.16378	0.00166868	0.585973	-1.32891
ENSG00000149483	TMEM138	-0.0742237	4.15881	-3.15558	0.00171519	0.585973	-1.3193
ENSG00000157077	ZFYVE9	0.109987	3.05087	3.15524	0.00171713	0.585973	-1.31914
ENSG00000134709	HOOK1	0.152485	3.15446	3.13644	0.00182846	0.585973	-1.36855
ENSG00000067704	IARS2	0.0734844	5.72046	3.12535	0.00189717	0.585973	-1.43301
ENSG00000101343	CRNKL1	0.0688223	6.10015	3.12406	0.00190529	0.585973	-1.44026
ENSG00000119711	ALDH6A1	0.0672889	3.75214	3.12062	0.00192718	0.585973	-1.4098
ENSG00000135677	GNS	0.0784876	7.86051	3.11807	0.00194357	0.585973	-1.4528
ENSG00000069248	NUP133	0.054522	5.73844	3.10531	0.00202747	0.585973	-1.49028
ENSG00000143149	ALDH9A1	0.0694494	5.689	3.103	0.00204298	0.585973	-1.49671
ENSG00000229474	PATL2	-0.12156	4.49009	-3.09056	0.00212853	0.585973	-1.50878
ENSG00000133104	SPG20	0.0761481	5.49777	3.09052	0.00212885	0.585973	-1.52952
ENSG00000110723	EXPH5	0.13371	2.09866	3.08665	0.0021561	0.585973	-1.54408
ENSG00000081189	MEF2C	0.0901019	6.39907	3.08541	0.0021649	0.585973	-1.55078
ENSG00000269343	ZNF587B	0.0647173	5.1608	3.08196	0.00218961	0.585973	-1.54702
ENSG00000130164	LDLR	-0.152365	2.7652	-3.07159	0.00226539	0.585973	-1.54671
ENSG00000101057	MYBL2	-0.239983	1.70558	-3.06582	0.00230859	0.585973	-1.6094
ENSG00000171865	RNASEH1	0.0463966	4.04964	3.05502	0.00239147	0.585973	-1.59532
ENSG00000162434	JAK1	0.0715245	9.20679	3.05173	0.00241733	0.585973	-1.62694
ENSG00000038219	BOD1L1	0.0770527	8.90391	3.04042	0.00250795	0.585973	-1.66098
ENSG00000170448	NFXL1	-0.177679	4.70295	-3.03235	0.00257445	0.585973	-1.67662
ENSG00000038945	MSR1	0.236484	2.20611	3.03033	0.00259136	0.585973	-1.67417
ENSG00000228801	RP11-110G21.1	0.106262	1.52218	3.02764	0.00261409	0.585973	-1.72969
ENSG00000152439	ZNF773	0.0765446	3.39643	3.01372	0.00273437	0.585973	-1.6953
ENSG00000135775	COG2	0.0420294	5.1084	3.00888	0.00277743	0.585973	-1.74835
ENSG00000124102	PI3	-0.265624	3.86253	-3.00676	0.00279642	0.585973	-1.72556
ENSG00000235162	C12orf75	-0.112843	3.45933	-3.00315	0.00282908	0.585973	-1.72437
ENSG00000152102	FAM168B	0.0506224	5.94852	2.99708	0.00288488	0.585973	-1.79442
ENSG00000075856	SART3	0.0487883	5.88479	2.99394	0.00291409	0.585973	-1.80226
ENSG00000138780	GSTCD	0.0757888	2.67035	2.98847	0.00296569	0.585973	-1.76705
ENSG00000133059	DSTYK	0.0413592	5.48629	2.98736	0.00297617	0.585973	-1.8154
ENSG00000178665	ZNF713	0.126218	1.19944	2.9859	0.00299018	0.585973	-1.85101
ENSG00000114013	CD86	0.0824327	5.48466	2.98433	0.0030052	0.585973	-1.82341
ENSG00000185875	THNSL1	0.129807	2.53554	2.97804	0.00306627	0.585973	-1.79827
ENSG00000172215	CXCR6	0.166424	3.14001	2.97389	0.00310724	0.585973	-1.79853
ENSG00000122025	FLT3	0.157321	2.58348	2.9678	0.00316812	0.585973	-1.81872
ENSG00000257242	C12orf79	0.122936	2.22954	2.9664	0.00318228	0.585973	-1.83755
ENSG00000131873	CHSY1	0.0890896	6.23058	2.96632	0.00318309	0.585973	-1.88038
ENSG00000162676	GFI1	-0.114514	3.78617	-2.96252	0.00322183	0.585973	-1.83833
ENSG00000115306	SPTBN1	0.0789815	7.38457	2.95894	0.00325872	0.585973	-1.89875
ENSG00000147408	CSGALNACT1	-0.0980705	5.05477	-2.94955	0.00335731	0.590204	-1.91038
ENSG00000136869	TLR4	0.0927907	9.07667	2.94792	0.00337471	0.590204	-1.91062
ENSG00000152642	GPD1L	0.063363	4.63433	2.93535	0.00351171	0.599527	-1.93421
ENSG00000162852	CNST	0.0562524	6.38281	2.93413	0.00352522	0.599527	-1.96772
ENSG00000178996	SNX18	0.0663294	7.12613	2.92924	0.00358008	0.599527	-1.97979
ENSG00000082516	GEMIN5	0.0563298	4.50892	2.92608	0.00361585	0.599527	-1.95463
ENSG00000153201	RANBP2	0.0837939	8.01864	2.91309	0.00376665	0.612677	-2.01665
ENSG00000188227	ZNF793	0.109585	2.66603	2.90499	0.00386355	0.612677	-1.97729
ENSG00000135048	TMEM2	0.0644041	7.28369	2.90446	0.00386989	0.612677	-2.04543
ENSG00000113194	FAF2	0.0457158	5.41129	2.90305	0.00388712	0.612677	-2.04097
ENSG00000165733	BMS1	0.0603972	5.33605	2.88965	0.00405326	0.624608	-2.0734
ENSG00000259024	TVP23C-CDRT4	0.318743	2.29917	2.88612	0.00409816	0.624608	-2.03295
ENSG00000006652	IFRD1	0.0749582	6.7729	2.88359	0.00413059	0.624608	-2.10229
ENSG00000135898	GPR55	-0.148693	2.41097	-2.87922	0.00418708	0.624608	-2.0433
ENSG00000113013	HSPA9	0.0616854	6.71499	2.87608	0.00422815	0.624608	-2.12268
ENSG00000197448	GSTK1	-0.065935	6.74897	-2.87394	0.00425636	0.624608	-2.12837
ENSG00000171115	GIMAP8	0.0619489	6.38317	2.86794	0.00433639	0.628409	-2.14401
ENSG00000071967	CYBRD1	0.108743	5.53731	2.85795	0.00447248	0.628409	-2.16228
ENSG00000158473	CD1D	0.0769816	5.0694	2.85062	0.00457487	0.628409	-2.17142
ENSG00000131263	RLIM	0.0771571	7.50051	2.85004	0.00458315	0.628409	-2.1876
ENSG00000065150	IPO5	0.05493	5.83815	2.84962	0.00458904	0.628409	-2.1875
ENSG00000163171	CDC42EP3	-0.071719	7.16583	-2.84729	0.0046222	0.628409	-2.19652
ENSG00000259959	RP11-121C2.2	-0.186195	3.17786	-2.84105	0.00471174	0.628409	-2.13655
ENSG00000166503	HDGFRP3	-0.164682	2.75702	-2.83888	0.00474336	0.628409	-2.13771
ENSG00000169895	SYAP1	0.0606736	5.23416	2.83637	0.00478014	0.628409	-2.21133
ENSG00000143815	LBR	0.0805277	8.09374	2.83302	0.00482958	0.628409	-2.22532
ENSG00000063601	MTMR1	0.0449739	5.74291	2.82819	0.00490166	0.628409	-2.24252
ENSG00000162378	ZYG11B	0.0793691	6.18015	2.82466	0.00495491	0.628409	-2.25633
ENSG00000006715	VPS41	0.0627109	6.61695	2.82419	0.00496199	0.628409	-2.25862
ENSG00000253719	ATXN7L3B	0.0371377	6.30724	2.82128	0.00500652	0.628409	-2.26543
ENSG00000147180	ZNF711	0.160756	1.12503	2.81836	0.00505139	0.628409	-2.24286
ENSG00000116005	PCYOX1	0.0702231	4.61399	2.81458	0.00511006	0.628409	-2.24771
ENSG00000167721	TSR1	0.0563653	4.61206	2.814	0.00511902	0.628409	-2.24904
ENSG00000106609	TMEM248	0.0359959	6.50923	2.80269	0.00529871	0.630764	-2.31415
ENSG00000196419	XRCC6	0.0628607	7.32377	2.79907	0.0053574	0.630764	-2.32093
ENSG00000122692	SMU1	0.043443	6.27048	2.79002	0.00550657	0.630764	-2.34607
ENSG00000099204	ABLIM1	0.073787	7.08859	2.78333	0.00561924	0.630764	-2.3625
ENSG00000124602	UNC5CL	-0.106241	1.23504	-2.77683	0.0057308	0.630764	-2.32364
ENSG00000102910	LONP2	0.0416904	7.07171	2.76833	0.00587976	0.630764	-2.40097
ENSG00000143384	MCL1	0.0583746	10.6319	2.76805	0.00588476	0.630764	-2.35773
ENSG00000119943	PYROXD2	-0.103861	2.48868	-2.76433	0.00595093	0.630764	-2.31683
ENSG00000169499	PLEKHA2	0.0553682	6.89181	2.76316	0.00597202	0.630764	-2.41479
ENSG00000198771	RCSD1	0.0497452	8.08525	2.76276	0.0059791	0.630764	-2.40592
ENSG00000112118	MCM3	0.0624432	5.1818	2.75829	0.00606006	0.630764	-2.40843
ENSG00000095015	MAP3K1	0.0642916	8.69764	2.74896	0.00623214	0.630764	-2.43297
ENSG00000255389	C6orf3	0.131102	1.1332	2.74368	0.00633149	0.630764	-2.40397
ENSG00000091009	RBM27	0.065484	6.10687	2.74353	0.00633423	0.630764	-2.46299
ENSG00000151320	AKAP6	0.16411	2.43794	2.74114	0.00637978	0.630764	-2.37207
ENSG00000196159	FAT4	0.200273	1.79919	2.73975	0.00640641	0.630764	-2.38533
ENSG00000160712	IL6R	0.0671214	8.57677	2.73831	0.00643403	0.630764	-2.46062
ENSG00000093000	NUP50	0.0573466	7.63655	2.73635	0.00647165	0.630764	-2.47733
ENSG00000108946	PRKAR1A	0.0747831	8.54664	2.73543	0.00648951	0.630764	-2.46838
ENSG00000113761	ZNF346	-0.0717534	3.72689	-2.7292	0.00661127	0.630764	-2.42805
ENSG00000285827		-0.202701	2.19367	-2.72433	0.00670784	0.630764	-2.41176
ENSG00000178502	KLHL11	0.0573184	4.81521	2.72386	0.00671716	0.630764	-2.48351
ENSG00000197128	ZNF772	0.0949996	3.70613	2.72045	0.00678565	0.630764	-2.44486
ENSG00000108582	CPD	0.0988036	8.21691	2.71797	0.00683592	0.630764	-2.51621
ENSG00000054118	THRAP3	0.0572946	7.51618	2.71252	0.00694719	0.630764	-2.53835
ENSG00000164091	WDR82	0.0424741	7.61083	2.71173	0.00696347	0.630764	-2.53954
ENSG00000169877	AHSP	-0.264785	4.5433	-2.71107	0.00697729	0.630764	-2.50833
ENSG00000102743	SLC25A15	0.0640927	3.001	2.70802	0.00704052	0.630764	-2.45288
ENSG00000169981	ZNF35	0.076538	2.89039	2.70786	0.00704386	0.630764	-2.45139
ENSG00000115289	PCGF1	-0.0845919	1.85933	-2.70727	0.00705612	0.630764	-2.45555
ENSG00000092148	HECTD1	0.0525909	7.60917	2.70654	0.0070714	0.630764	-2.55246
ENSG00000171649	ZIK1	0.080847	3.24865	2.70623	0.00707801	0.630764	-2.46255
ENSG00000113319	RASGRF2	0.0762044	5.02347	2.70481	0.00710774	0.630764	-2.53568
ENSG00000140391	TSPAN3	0.0782539	4.57487	2.70331	0.00713947	0.630764	-2.5235
ENSG00000214530	STARD10	-0.144677	2.2408	-2.70277	0.0071508	0.630764	-2.46025
ENSG00000166401	SERPINB8	0.0570799	4.43518	2.70269	0.00715247	0.630764	-2.52403
ENSG00000196305	IARS	0.0491903	6.24561	2.70062	0.00719628	0.630764	-2.57072
ENSG00000176871	WSB2	-0.0616859	5.12091	-2.69999	0.00720974	0.630764	-2.55575
ENSG00000197275	RAD54B	0.199323	1.0454	2.69539	0.00730842	0.630764	-2.51239
ENSG00000077514	POLD3	0.0560417	4.55354	2.69424	0.00733309	0.630764	-2.54842
ENSG00000147475	ERLIN2	0.042084	4.80806	2.69381	0.00734259	0.630764	-2.55891
ENSG00000163788	SNRK	0.0544459	8.07274	2.69254	0.00737002	0.630764	-2.58163
ENSG00000198663	C6orf89	0.0407306	6.45364	2.6897	0.00743207	0.630764	-2.59935
ENSG00000163877	SNIP1	0.0485055	4.84563	2.68948	0.00743669	0.630764	-2.57078
ENSG00000182220	ATP6AP2	0.0686931	6.76211	2.68669	0.00749809	0.630764	-2.60656
ENSG00000165675	ENOX2	0.0483486	3.75577	2.68512	0.00753276	0.630764	-2.53383
ENSG00000146909	NOM1	0.0435846	4.44812	2.68499	0.00753566	0.630764	-2.56414
ENSG00000085721	RRN3	0.0614699	5.33567	2.68067	0.00763201	0.630764	-2.60581
ENSG00000165280	VCP	0.0609632	7.66291	2.67934	0.00766187	0.630764	-2.61909
ENSG00000086712	TXLNG	0.061677	4.4775	2.67858	0.00767912	0.630764	-2.57743
ENSG00000160588	MPZL3	0.0825909	6.87841	2.6758	0.00774197	0.630764	-2.63251
ENSG00000163162	RNF149	0.0660441	8.84876	2.67529	0.00775359	0.630764	-2.61272
ENSG00000288670		0.0951012	2.12416	2.67497	0.00776071	0.630764	-2.52495
ENSG00000136193	SCRN1	0.0776804	4.79126	2.67298	0.00780612	0.630764	-2.6081
ENSG00000089876	DHX32	0.0728871	3.46763	2.66875	0.00790345	0.634613	-2.56052
ENSG00000116741	RGS2	0.0920543	8.77625	2.65064	0.00833249	0.653593	-2.67331
ENSG00000078589	P2RY10	0.0848247	5.90475	2.6475	0.00840908	0.653593	-2.69711
ENSG00000281162	LINC01127	0.12434	3.90404	2.64426	0.00848881	0.653593	-2.64287
ENSG00000266086	RP11-159D12.5	0.269972	1.67874	2.64255	0.00853106	0.653593	-2.60571
ENSG00000273173	SNURF	0.130537	1.33665	2.63996	0.00859534	0.653593	-2.61983
ENSG00000173221	GLRX	-0.064741	5.8178	-2.63649	0.00868223	0.653593	-2.72568
ENSG00000179456	ZBTB18	0.0443175	6.47169	2.63573	0.00870159	0.653593	-2.73148
ENSG00000156675	RAB11FIP1	0.0723625	8.39567	2.63068	0.00882971	0.653593	-2.72776
ENSG00000197956	S100A6	-0.0975896	6.59484	-2.63032	0.0088389	0.653593	-2.74465
ENSG00000151748	SAV1	0.0724153	3.55318	2.63017	0.00884277	0.653593	-2.65324
ENSG00000153107	ANAPC1	0.0473683	6.04021	2.62981	0.00885182	0.653593	-2.74269
ENSG00000198342	ZNF442	0.146785	0.937388	2.62737	0.00891472	0.653593	-2.65919
ENSG00000151006	PRSS53	-0.154679	1.27781	-2.62697	0.00892499	0.653593	-2.64588
ENSG00000133789	SWAP70	0.0797119	5.72168	2.62565	0.00895896	0.653593	-2.74724
ENSG00000103994	ZNF106	0.0611392	8.36298	2.62498	0.00897632	0.653593	-2.74196
ENSG00000027001	MIPEP	0.0540724	2.61768	2.62265	0.00903707	0.653593	-2.64235
ENSG00000103196	CRISPLD2	0.118758	6.53511	2.62212	0.00905096	0.653593	-2.76286
ENSG00000029364	SLC39A9	0.0347175	6.04971	2.62033	0.00909771	0.653593	-2.76667
ENSG00000132670	PTPRA	-0.0588685	5.83305	-2.61977	0.00911252	0.653593	-2.76561
ENSG00000106462	EZH2	-0.0887578	2.63573	-2.61148	0.00933284	0.663429	-2.66877
ENSG00000152684	PELO	-0.0669406	3.83895	-2.61071	0.00935358	0.663429	-2.71805
ENSG00000163374	YY1AP1	-0.0858418	5.58683	-2.60566	0.00949033	0.667121	-2.79638
ENSG00000008517	IL32	-0.109732	4.70398	-2.60493	0.00951014	0.667121	-2.76656
ENSG00000120594	PLXDC2	0.0763632	7.56227	2.59505	0.00978349	0.678593	-2.82376
ENSG00000113812	ACTR8	0.0421648	4.90857	2.59357	0.00982485	0.678593	-2.80334
ENSG00000173905	GOLIM4	0.0749765	3.33846	2.59328	0.00983314	0.678593	-2.7316
ENSG00000090924	PLEKHG2	-0.124151	2.84193	-2.58493	0.0100706	0.686565	-2.73255
ENSG00000198932	GPRASP1	0.0774933	5.07894	2.58328	0.0101181	0.686565	-2.83038
ENSG00000228956	SATB1-AS1	0.100261	4.36212	2.57951	0.0102276	0.686565	-2.80872
ENSG00000114302	PRKAR2A	0.0409206	5.77833	2.57636	0.0103198	0.686565	-2.86841
ENSG00000127022	CANX	0.0591765	8.18622	2.57572	0.0103386	0.686565	-2.86271
ENSG00000271816	BMS1P4	-0.121118	1.86256	-2.57246	0.0104348	0.686565	-2.75017
ENSG00000177613	CSTF2T	0.0511415	5.46314	2.57221	0.0104423	0.686565	-2.87118
ENSG00000261611	AC010547.9	0.196645	1.90044	2.57136	0.0104676	0.686565	-2.75349
ENSG00000198885	ITPRIPL1	-0.0974308	2.73462	-2.5698	0.010514	0.686565	-2.76356
ENSG00000198270	TMEM116	-0.0579314	4.00435	-2.56979	0.0105142	0.686565	-2.8168
ENSG00000149084	HSD17B12	0.0967203	4.46607	2.56709	0.0105954	0.686565	-2.84774
ENSG00000149970	CNKSR2	0.10231	3.87206	2.56567	0.0106382	0.686565	-2.81485
ENSG00000130312	MRPL34	-0.11886	2.88709	-2.56198	0.0107502	0.686565	-2.78572
ENSG00000120705	ETF1	0.0571781	5.96289	2.55907	0.010839	0.686565	-2.91182
ENSG00000198453	ZNF568	0.0719169	3.23733	2.55774	0.01088	0.686565	-2.80484
ENSG00000115425	PECR	-0.0540732	3.29981	-2.55758	0.0108848	0.686565	-2.81151
ENSG00000011198	ABHD5	0.0852033	7.27391	2.55697	0.0109036	0.686565	-2.91611
ENSG00000272150	NBPF25P	0.120578	1.72232	2.55655	0.0109166	0.686565	-2.7857
ENSG00000085511	MAP3K4	0.0447323	5.70381	2.55192	0.0110606	0.692211	-2.92317
ENSG00000119402	FBXW2	0.048152	6.95352	2.54828	0.0111747	0.695937	-2.93957
ENSG00000236255	AC009404.2	-0.0842338	2.15917	-2.54386	0.0113152	0.700595	-2.81097
ENSG00000143067	ZNF697	0.0870996	2.94557	2.54246	0.0113599	0.700595	-2.83135
ENSG00000057704	TMCC3	0.0748236	6.52098	2.54	0.0114388	0.700595	-2.95898
ENSG00000106477	CEP41	0.0677274	2.77619	2.53906	0.011469	0.700595	-2.83039
ENSG00000023330	ALAS1	-0.0547873	4.35742	-2.53406	0.0116316	0.704585	-2.9224
ENSG00000197077	KIAA1671	-0.176791	1.72905	-2.53366	0.0116447	0.704585	-2.83288
ENSG00000267508	ZNF285	0.136053	1.15083	2.52654	0.0118797	0.713862	-2.85906
ENSG00000084110	HAL	0.0646782	6.15541	2.52336	0.0119859	0.713862	-2.99601
ENSG00000198780	FAM169A	0.10325	4.1729	2.52226	0.0120231	0.713862	-2.93217
ENSG00000112096	SOD2	0.086138	10.6102	2.52075	0.0120741	0.713862	-2.94973
ENSG00000204516	MICB	-0.061108	4.47092	-2.52064	0.0120776	0.713862	-2.95801
ENSG00000071205	ARHGAP10	-0.0809848	3.43493	-2.51178	0.0123806	0.726243	-2.92037
ENSG00000219085	NPM1P37	0.105462	2.50799	2.51119	0.0124008	0.726243	-2.88486
ENSG00000167193	CRK	0.0327929	5.98633	2.50793	0.012514	0.726724	-3.03162
ENSG00000132623	ANKEF1	0.080102	2.57502	2.50638	0.0125682	0.726724	-2.89583
ENSG00000148346	LCN2	-0.217032	2.39711	-2.50504	0.0126153	0.726724	-2.90206
ENSG00000025293	PHF20	0.039385	6.56693	2.50443	0.0126367	0.726724	-3.0426
ENSG00000062650	WAPAL	0.0579557	7.24864	2.50183	0.0127286	0.728727	-3.04596
ENSG00000184860	SDR42E1	0.0762638	3.39926	2.49355	0.0130249	0.738818	-2.95628
ENSG00000135363	LMO2	-0.0581504	5.35711	-2.49133	0.0131055	0.738818	-3.05897
ENSG00000109956	B3GAT1	-0.201714	1.91447	-2.49019	0.0131469	0.738818	-2.92301
ENSG00000228049	POLR2J2	-0.192526	2.68757	-2.48764	0.01324	0.738818	-2.94262
ENSG00000160408	ST6GALNAC6	-0.108185	4.61904	-2.48722	0.0132554	0.738818	-3.03779
ENSG00000063046	EIF4B	0.0594119	8.98422	2.48585	0.0133059	0.738818	-3.05934
ENSG00000102445	KIAA0226L	0.0896183	6.34276	2.48574	0.0133099	0.738818	-3.08484
ENSG00000070010	UFD1L	-0.0357289	5.03978	-2.4826	0.013426	0.740555	-3.06815
ENSG00000180530	NRIP1	0.0779052	5.89133	2.48176	0.0134573	0.740555	-3.08969
ENSG00000182670	TTC3	0.0648382	7.37299	2.47756	0.0136145	0.743819	-3.10084
ENSG00000005893	LAMP2	0.0811908	8.2381	2.47537	0.013697	0.743819	-3.0938
ENSG00000184992	BRI3BP	0.0474736	5.05607	2.47045	0.013884	0.743819	-3.09499
ENSG00000197872	FAM49A	0.0606653	7.01085	2.4703	0.0138899	0.743819	-3.11921
ENSG00000170871	KIAA0232	0.0554616	7.60537	2.47028	0.0138905	0.743819	-3.11425
ENSG00000115919	KYNU	0.0863246	5.08524	2.46656	0.0140336	0.743819	-3.10483
ENSG00000165637	VDAC2	0.0453774	5.14516	2.46648	0.0140369	0.743819	-3.10686
ENSG00000134470	IL15RA	-0.104447	2.40992	-2.46583	0.0140618	0.743819	-2.98066
ENSG00000070961	ATP2B1	0.0766832	7.75796	2.46552	0.0140737	0.743819	-3.12408
ENSG00000124374	PAIP2B	0.0718864	3.41511	2.46334	0.0141585	0.743819	-3.02085
ENSG00000180938	ZNF572	0.107079	1.85319	2.46289	0.014176	0.743819	-2.97842
ENSG00000113282	CLINT1	0.0497149	6.56032	2.46187	0.0142157	0.743819	-3.13988
ENSG00000165521	EML5	0.081144	3.16235	2.46033	0.0142759	0.743919	-3.01472
ENSG00000183111	ARHGEF37	-0.198943	1.41124	-2.45362	0.0145415	0.745224	-2.99806
ENSG00000153898	MCOLN2	-0.103256	3.48019	-2.45347	0.0145475	0.745224	-3.04876
ENSG00000073464	CLCN4	0.133475	3.59111	2.45318	0.014559	0.745224	-3.05712
ENSG00000160213	CSTB	-0.0808291	4.43494	-2.45276	0.0145757	0.745224	-3.11012
ENSG00000125812	GZF1	0.0464447	3.93536	2.45232	0.0145932	0.745224	-3.07972
ENSG00000035687	ADSS	0.0636011	5.8249	2.44979	0.0146945	0.745224	-3.16172
ENSG00000277969	CTB-58E17.1	-0.125854	1.07871	-2.44942	0.0147095	0.745224	-3.01033
ENSG00000077097	TOP2B	0.0735662	7.48406	2.44391	0.0149329	0.74933	-3.17607
ENSG00000143799	PARP1	0.0508833	6.63346	2.44249	0.014991	0.74933	-3.18344
ENSG00000176595	KBTBD11	0.0660043	4.74745	2.4424	0.0149948	0.74933	-3.14744
ENSG00000184371	CSF1	-0.132197	1.77546	-2.44165	0.0150253	0.74933	-3.02163
ENSG00000005882	PDK2	-0.155009	2.70481	-2.43985	0.0150995	0.750039	-3.04362
ENSG00000128294	TPST2	-0.0683966	5.91821	-2.43783	0.0151828	0.750039	-3.19062
ENSG00000080815	PSEN1	0.0462705	7.36388	2.43703	0.0152158	0.750039	-3.19205
ENSG00000135829	DHX9	0.0462994	7.56897	2.43461	0.0153166	0.752105	-3.19606
ENSG00000151718	WWC2	0.0735982	2.8499	2.43202	0.015425	0.753335	-3.06437
ENSG00000047410	TPR	0.0644839	8.29319	2.4312	0.0154597	0.753335	-3.19347
ENSG00000137522	RNF121	-0.0548511	3.15376	-2.42596	0.0156815	0.759335	-3.09275
ENSG00000205352	PRR13	-0.0797085	4.26231	-2.42519	0.0157141	0.759335	-3.16367
ENSG00000134899	ERCC5	0.0392081	6.95023	2.42374	0.0157764	0.759335	-3.22515
ENSG00000198682	PAPSS2	0.0979551	2.10751	2.4227	0.0158207	0.759335	-3.06324
ENSG00000168036	CTNNB1	0.0326416	7.77786	2.42125	0.0158831	0.759472	-3.22326
ENSG00000186462	NAP1L2	0.118773	2.2012	2.41648	0.0160898	0.76364	-3.07542
ENSG00000138095	LRPPRC	0.0609194	6.25077	2.41648	0.0160898	0.76364	-3.24054
ENSG00000248429	RP11-597D13.9	-0.116726	2.31239	-2.41167	0.0163008	0.768616	-3.09491
ENSG00000163166	IWS1	0.0431492	5.91711	2.41135	0.0163151	0.768616	-3.24941
ENSG00000165650	PDZD8	0.0659484	6.80147	2.40818	0.0164553	0.769803	-3.26006
ENSG00000100796	SMEK1	0.0493735	7.17708	2.40749	0.0164858	0.769803	-3.26009
ENSG00000198730	CTR9	0.0590933	6.04625	2.40537	0.0165808	0.769803	-3.2641
ENSG00000188997	KCTD21	-0.0753617	2.9304	-2.40535	0.0165815	0.769803	-3.12725
ENSG00000198945	L3MBTL3	0.0576001	4.88454	2.4029	0.0166915	0.770294	-3.23772
ENSG00000176834	VSIG10	-0.154835	1.68148	-2.40161	0.0167498	0.770294	-3.10158
ENSG00000158856	DMTN	-0.216856	6.95645	-2.40084	0.0167846	0.770294	-3.27508
ENSG00000125630	POLR1B	0.0445878	4.83929	2.39634	0.0169891	0.770294	-3.24913
ENSG00000164047	CAMP	-0.2037	2.89788	-2.39601	0.0170043	0.770294	-3.1573
ENSG00000261526	CTB-31O20.2	-0.0843531	2.03506	-2.39191	0.0171927	0.770294	-3.1239
ENSG00000110315	RNF141	0.0830598	6.59641	2.39143	0.0172149	0.770294	-3.29755
ENSG00000086475	SEPHS1	0.0416114	4.11408	2.39012	0.0172757	0.770294	-3.22435
ENSG00000112149	CD83	0.0788318	3.2295	2.3898	0.0172906	0.770294	-3.16808
ENSG00000145740	SLC30A5	0.0593235	5.21395	2.38731	0.0174065	0.770294	-3.28519
ENSG00000124107	SLPI	-0.182561	2.35809	-2.38643	0.0174476	0.770294	-3.14653
ENSG00000136827	TOR1A	-0.0386777	4.90893	-2.3864	0.017449	0.770294	-3.27849
ENSG00000178307	TMEM11	-0.0701505	2.36532	-2.38401	0.017561	0.770294	-3.14819
ENSG00000109436	TBC1D9	0.0634315	5.26628	2.38394	0.0175644	0.770294	-3.29482
ENSG00000118655	DCLRE1B	-0.0567647	2.63122	-2.38331	0.0175943	0.770294	-3.15834
ENSG00000166169	POLL	-0.141665	4.48629	-2.38242	0.0176364	0.770294	-3.26763
ENSG00000131845	ZNF304	0.0538884	4.06189	2.38024	0.0177394	0.770294	-3.24206
ENSG00000165732	DDX21	0.0612738	6.67932	2.37948	0.0177754	0.770294	-3.32391
ENSG00000067596	DHX8	0.046778	6.65205	2.37939	0.0177798	0.770294	-3.3243
ENSG00000167094	TTC16	-0.14962	3.0364	-2.37707	0.0178907	0.770294	-3.19017
ENSG00000261338	RP11-378A13.1	0.0568997	3.4065	2.37553	0.0179646	0.770294	-3.21348
ENSG00000185158	LRRC37B	-0.0507348	4.49633	-2.37381	0.0180472	0.770294	-3.2854
ENSG00000165355	FBXO33	0.05359	5.62027	2.37301	0.0180856	0.770294	-3.32882
ENSG00000004487	KDM1A	0.040998	5.28952	2.37283	0.0180947	0.770294	-3.31872
ENSG00000074966	TXK	0.0799021	5.76675	2.37271	0.0181004	0.770294	-3.33035
ENSG00000125384	PTGER2	-0.0566739	5.1686	-2.3714	0.0181638	0.770423	-3.31844
ENSG00000121104	FAM117A	-0.146193	5.4957	-2.36844	0.018308	0.773966	-3.33709
ENSG00000100243	CYB5R3	-0.154754	3.51255	-2.36435	0.0185086	0.778022	-3.24689
ENSG00000118007	STAG1	0.0573562	6.47829	2.364	0.0185258	0.778022	-3.35798
ENSG00000114383	TUSC2	-0.0726343	3.38912	-2.35769	0.0188394	0.786663	-3.25203
ENSG00000278897	AC020951.1	0.0858313	2.98052	2.3553	0.0189594	0.786663	-3.22764
ENSG00000143416	SELENBP1	-0.215636	6.92056	-2.35258	0.0190966	0.786663	-3.3809
ENSG00000183431	SF3A3	0.0445737	5.72706	2.35122	0.0191657	0.786663	-3.37733
ENSG00000167208	SNX20	-0.0530355	6.08624	-2.35073	0.0191906	0.786663	-3.38499
ENSG00000106635	BCL7B	-0.0779645	3.45208	-2.35071	0.0191919	0.786663	-3.26958
ENSG00000196139	AKR1C3	0.1501	2.26922	2.3435	0.0195619	0.786663	-3.2255
ENSG00000136868	SLC31A1	0.0556706	4.70512	2.3427	0.019603	0.786663	-3.36284
ENSG00000129083	COPB1	0.0633048	7.00063	2.34146	0.0196674	0.786663	-3.40587
ENSG00000106723	SPIN1	0.054011	4.54746	2.34143	0.0196691	0.786663	-3.35439
ENSG00000153147	SMARCA5	0.0675762	6.79131	2.33969	0.0197599	0.786663	-3.41058
ENSG00000285708		-0.135489	1.23015	-2.33942	0.0197741	0.786663	-3.22023
ENSG00000205189	ZBTB10	0.0880658	4.4425	2.33906	0.0197928	0.786663	-3.351
ENSG00000167210	LOXHD1	0.172212	2.29266	2.33897	0.0197972	0.786663	-3.23621
ENSG00000111885	MAN1A1	0.0786378	6.67541	2.33795	0.019851	0.786663	-3.41424
ENSG00000104763	ASAH1	0.0605621	8.32959	2.33705	0.0198981	0.786663	-3.39822
ENSG00000172116	CD8B	-0.133814	4.95137	-2.33693	0.0199043	0.786663	-3.38149
ENSG00000163904	SENP2	0.0470506	4.96186	2.33615	0.0199455	0.786663	-3.38769
ENSG00000197989	SNHG12	-0.0584939	3.61753	-2.33592	0.0199576	0.786663	-3.30868
ENSG00000117036	ETV3	0.0359805	5.68431	2.3358	0.0199639	0.786663	-3.41081
ENSG00000130826	DKC1	0.0480918	4.73167	2.33192	0.0201693	0.792311	-3.38374
ENSG00000113448	PDE4D	0.077102	5.52419	2.32682	0.0204421	0.798074	-3.42462
ENSG00000178386	ZNF223	0.11468	1.78341	2.32579	0.0204973	0.798074	-3.2488
ENSG00000029363	BCLAF1	0.0713463	8.31915	2.32568	0.0205035	0.798074	-3.42427
ENSG00000009954	BAZ1B	0.0442798	6.34027	2.32306	0.0206449	0.801135	-3.44573
ENSG00000147168	IL2RG	-0.0601587	6.56516	-2.32129	0.0207414	0.802439	-3.45053
ENSG00000230530	LIMD1-AS1	-0.0853675	1.36992	-2.31553	0.0210573	0.806081	-3.26521
ENSG00000245025	RP11-875O11.1	-0.108617	2.09005	-2.31536	0.0210668	0.806081	-3.27584
ENSG00000227051	C14orf132	0.153932	1.82246	2.3151	0.021081	0.806081	-3.26896
ENSG00000073614	KDM5A	0.0451922	8.50134	2.31418	0.0211317	0.806081	-3.44516
ENSG00000115423	DNAH6	0.132001	1.40763	2.31306	0.0211939	0.806081	-3.26965
ENSG00000261556	SMG1P7	-0.0734457	3.2212	-2.31269	0.0212143	0.806081	-3.33266
ENSG00000215067	ALOX12-AS1	-0.0486547	3.62126	-2.31063	0.0213293	0.808044	-3.36469
ENSG00000102145	GATA1	-0.199278	4.2889	-2.30858	0.0214436	0.809972	-3.41467
ENSG00000070018	LRP6	0.131874	2.06527	2.30389	0.0217083	0.810124	-3.29582
ENSG00000157184	CPT2	0.0371122	4.30902	2.30294	0.0217624	0.810124	-3.42434
ENSG00000049449	RCN1	0.0738128	3.13419	2.30187	0.0218229	0.810124	-3.34799
ENSG00000158555	GDPD5	-0.159096	2.99853	-2.30009	0.0219246	0.810124	-3.34507
ENSG00000100221	JOSD1	0.0450151	5.36926	2.29957	0.0219543	0.810124	-3.47925
ENSG00000204310	AGPAT1	-0.104664	2.81915	-2.29953	0.0219568	0.810124	-3.33763
ENSG00000175595	ERCC4	0.0506466	3.91488	2.29926	0.021972	0.810124	-3.4039
ENSG00000162543	UBXN10	-0.124092	2.03022	-2.29879	0.0219989	0.810124	-3.30713
ENSG00000163539	CLASP2	0.0429138	6.23279	2.29845	0.0220187	0.810124	-3.49778
ENSG00000113269	RNF130	0.0450758	7.53012	2.29564	0.0221805	0.812533	-3.49864
ENSG00000177272	KCNA3	-0.0664959	5.15301	-2.2951	0.0222115	0.812533	-3.47996
ENSG00000270120	RP11-327F22.6	-0.101812	2.31263	-2.29361	0.022298	0.813026	-3.32849
ENSG00000163659	TIPARP	0.0570275	5.91918	2.28677	0.0226978	0.813026	-3.51938
ENSG00000085982	USP40	0.0526812	3.73982	2.28667	0.022704	0.813026	-3.41653
ENSG00000116771	AGMAT	0.0765697	2.12523	2.28613	0.0227359	0.813026	-3.3306
ENSG00000143365	RORC	0.144709	1.59161	2.2824	0.0229568	0.813026	-3.32818
ENSG00000107290	SETX	0.0615528	9.38587	2.28017	0.02309	0.813026	-3.50005
ENSG00000240859	AC093627.10	-0.0957217	1.82307	-2.27881	0.0231716	0.813026	-3.34076
ENSG00000151726	ACSL1	0.0828778	9.62944	2.27862	0.023183	0.813026	-3.49752
ENSG00000235531	RP11-383H13.1	-0.135845	2.03854	-2.27753	0.0232481	0.813026	-3.3471
ENSG00000152990	GPR125	0.140914	1.16111	2.27707	0.023276	0.813026	-3.33569
ENSG00000180346	TIGD2	0.0894791	2.88674	2.27539	0.0233776	0.813026	-3.38406
ENSG00000041880	PARP3	-0.120487	1.07608	-2.27488	0.0234086	0.813026	-3.33965
ENSG00000139719	VPS33A	0.0323849	5.44064	2.27321	0.0235096	0.813026	-3.53724
ENSG00000116824	CD2	-0.0680158	5.64986	-2.27311	0.0235157	0.813026	-3.54091
ENSG00000134987	WDR36	0.0628599	5.55503	2.27169	0.0236024	0.813026	-3.54233
ENSG00000121406	ZNF549	0.0460924	4.25059	2.27061	0.0236678	0.813026	-3.48319
ENSG00000232021	LEF1-AS1	0.120131	2.48881	2.27021	0.0236925	0.813026	-3.37262
ENSG00000172650	AGAP5	-0.170997	1.74496	-2.26788	0.0238356	0.813026	-3.35953
ENSG00000154957	ZNF18	0.0360959	4.49249	2.26735	0.0238681	0.813026	-3.51011
ENSG00000111371	SLC38A1	0.0481884	8.33514	2.26619	0.0239398	0.813026	-3.55049
ENSG00000178761	FAM219B	-0.0376689	5.35201	-2.2658	0.0239634	0.813026	-3.55059
ENSG00000246898	LINC00920	0.135001	1.18815	2.2658	0.0239639	0.813026	-3.3561
ENSG00000072803	FBXW11	0.0385289	5.88524	2.2657	0.02397	0.813026	-3.56319
ENSG00000110665	C11orf21	-0.0705743	6.18672	-2.26549	0.0239828	0.813026	-3.56703
ENSG00000115762	PLEKHB2	0.0329784	6.99814	2.26507	0.0240091	0.813026	-3.56827
ENSG00000284946		-0.146651	1.32248	-2.26494	0.024017	0.813026	-3.35893
ENSG00000129680	MAP7D3	0.0563271	3.35991	2.26374	0.0240914	0.813026	-3.43732
ENSG00000176422	SPRYD4	-0.0549749	3.42139	-2.26355	0.0241034	0.813026	-3.44355
ENSG00000101109	STK4	0.045218	9.26142	2.26337	0.0241145	0.813026	-3.53761
ENSG00000159733	ZFYVE28	-0.130177	2.91295	-2.26303	0.0241354	0.813026	-3.41343
ENSG00000146731	CCT6A	0.0571897	6.06713	2.26081	0.0242737	0.813195	-3.57547
ENSG00000179841	AKAP5	0.162175	1.92685	2.2597	0.0243431	0.813195	-3.37705
ENSG00000115825	PRKD3	0.0617632	5.97388	2.2594	0.0243622	0.813195	-3.57709
ENSG00000206199	ANKUB1	0.135358	1.21978	2.25887	0.0243952	0.813195	-3.36913
ENSG00000140157	NIPA2	0.0423329	5.36368	2.25675	0.024529	0.814833	-3.56951
ENSG00000066654	THUMPD1	0.0660658	6.25442	2.25589	0.0245832	0.814833	-3.58716
ENSG00000174428	GTF2IRD2B	0.048868	4.27979	2.25423	0.0246881	0.814833	-3.52049
ENSG00000064419	TNPO3	0.0335063	6.40764	2.25329	0.024748	0.814833	-3.59413
ENSG00000279453	RP3-425C14.4	0.0830045	2.6322	2.25304	0.0247635	0.814833	-3.41598
ENSG00000181191	PJA1	0.0551197	3.56025	2.24999	0.0249581	0.819127	-3.47749
ENSG00000269837	IPO5P1	0.0589455	3.22063	2.24664	0.0251736	0.822728	-3.45997
ENSG00000008869	HEATR5B	0.0415849	6.71487	2.24597	0.0252164	0.822728	-3.60932
ENSG00000174010	KLHL15	0.0719097	4.40515	2.24398	0.0253452	0.822728	-3.5502
ENSG00000162961	DPY30	-0.099496	2.36952	-2.24373	0.0253619	0.822728	-3.42455
ENSG00000210082	MT-RNR2	-0.21819	9.81982	-2.24329	0.0253901	0.822728	-3.56685
ENSG00000166337	TAF10	-0.0580292	5.64642	-2.24201	0.0254738	0.823351	-3.60917
ENSG00000037474	NSUN2	0.0338572	5.71944	2.23721	0.025788	0.823423	-3.61871
ENSG00000153207	AHCTF1	0.0650633	7.94477	2.23344	0.0260372	0.823423	-3.6233
ENSG00000170365	SMAD1	-0.10574	1.80094	-2.23329	0.0260475	0.823423	-3.42512
ENSG00000067369	TP53BP1	0.0447764	5.66217	2.23317	0.0260553	0.823423	-3.62587
ENSG00000068489	PRR11	-0.0826595	1.98282	-2.23287	0.0260754	0.823423	-3.43249
ENSG00000148158	SNX30	0.0388957	6.0796	2.23162	0.0261585	0.823423	-3.63677
ENSG00000250569	NTAN1P2	-0.0712336	1.2692	-2.22956	0.026296	0.823423	-3.42243
ENSG00000133997	MED6	0.0474994	4.6979	2.22922	0.026319	0.823423	-3.59723
ENSG00000113369	ARRDC3	0.0865837	8.27247	2.22799	0.0264017	0.823423	-3.62909
ENSG00000198336	MYL4	-0.201234	2.89178	-2.22755	0.0264314	0.823423	-3.48469
ENSG00000139112	GABARAPL1	0.0494345	5.95236	2.22696	0.026471	0.823423	-3.64471
ENSG00000139725	RHOF	-0.075188	4.27667	-2.22629	0.0265162	0.823423	-3.58064
ENSG00000211459	MT-RNR1	-0.26119	7.23991	-2.2257	0.026556	0.823423	-3.64753
ENSG00000169967	MAP3K2	0.070142	8.44457	2.2254	0.0265762	0.823423	-3.63124
ENSG00000268912	CTD-2619J13.17	0.0999402	1.51525	2.22305	0.0267351	0.823423	-3.436
ENSG00000082512	TRAF5	0.0479102	6.09747	2.22251	0.0267721	0.823423	-3.65357
ENSG00000188242	PP7080	-0.118919	2.04575	-2.22091	0.0268814	0.823423	-3.45357
ENSG00000215374	FAM66B	0.126001	1.31412	2.22018	0.026931	0.823423	-3.4397
ENSG00000244045	TMEM199	0.0302706	4.73874	2.21952	0.026976	0.823423	-3.62077
ENSG00000244482	LILRA6	-0.110809	5.15249	-2.2182	0.0270666	0.823423	-3.64466
ENSG00000089737	DDX24	0.0387986	6.89966	2.21791	0.0270867	0.823423	-3.66665
ENSG00000120800	UTP20	0.0540388	5.06095	2.21764	0.0271053	0.823423	-3.63599
ENSG00000223547	ZNF844	0.0832293	4.54507	2.21754	0.0271122	0.823423	-3.61274
ENSG00000196511	TPK1	0.0544227	4.7694	2.21692	0.0271548	0.823423	-3.62735
ENSG00000136758	YME1L1	0.0450353	7.07455	2.21686	0.027159	0.823423	-3.66792
ENSG00000159921	GNE	0.0423646	4.07607	2.21677	0.0271649	0.823423	-3.58311
ENSG00000260093	RP11-1E4.1	0.0838047	1.5157	2.2145	0.0273216	0.823423	-3.45182
ENSG00000188428	BLOC1S5	0.0526994	4.07713	2.2135	0.027391	0.823423	-3.58946
ENSG00000047634	SCML1	0.112254	2.9721	2.21329	0.027406	0.823423	-3.50995
ENSG00000114796	KLHL24	0.0580411	6.70923	2.21322	0.0274109	0.823423	-3.67697
ENSG00000241990	PRR34-AS1	-0.0616839	2.14554	-2.2114	0.027537	0.82527	-3.47645
ENSG00000163214	DHX57	0.0460613	4.83537	2.21045	0.0276035	0.825326	-3.64328
ENSG00000100503	NIN	0.0473194	8.85138	2.20769	0.027797	0.826845	-3.6596
ENSG00000167705	RILP	-0.186171	4.56983	-2.20686	0.0278554	0.826845	-3.64032
ENSG00000173276	ZBTB21	0.0527994	4.58722	2.20416	0.0280459	0.826845	-3.6419
ENSG00000060982	BCAT1	0.134894	3.52024	2.20308	0.0281229	0.826845	-3.57454
ENSG00000105835	NAMPT	0.0864659	11.5103	2.20245	0.0281677	0.826845	-3.61028
ENSG00000172578	KLHL6	0.0366417	6.30151	2.20136	0.0282449	0.826845	-3.70017
ENSG00000134765	DSC1	0.213326	1.51503	2.20129	0.02825	0.826845	-3.47587
ENSG00000010803	SCMH1	-0.0586732	3.50855	-2.201	0.0282708	0.826845	-3.57421
ENSG00000233937	CTC-338M12.4	-0.0705004	1.74195	-2.19712	0.0285483	0.826845	-3.48914
ENSG00000164649	CDCA7L	0.085037	4.29584	2.19669	0.0285794	0.826845	-3.63255
ENSG00000088930	XRN2	0.048319	7.0833	2.19581	0.0286428	0.826845	-3.71058
ENSG00000177570	SAMD12	0.117077	3.17351	2.1954	0.0286728	0.826845	-3.5558
ENSG00000076003	MCM6	0.0547092	4.25292	2.19478	0.0287173	0.826845	-3.63695
ENSG00000154781	CCDC174	0.0349677	4.77186	2.19419	0.0287597	0.826845	-3.6737
ENSG00000196455	PIK3R4	0.0375253	5.93373	2.19362	0.0288012	0.826845	-3.71249
ENSG00000106484	MEST	0.0952554	1.82837	2.19351	0.0288092	0.826845	-3.49576
ENSG00000124177	CHD6	0.0368661	6.77534	2.19265	0.0288717	0.826845	-3.7185
ENSG00000137642	SORL1	0.0702717	11.0914	2.19237	0.028892	0.826845	-3.64151
ENSG00000240849	TMEM189	-0.0615244	3.51985	-2.19199	0.0289196	0.826845	-3.59481
ENSG00000137054	POLR1E	0.0543586	3.65949	2.19158	0.0289496	0.826845	-3.60035
ENSG00000173230	GOLGB1	0.0612515	7.49714	2.18494	0.0294364	0.827226	-3.7291
ENSG00000166913	YWHAB	0.0505826	8.26363	2.18484	0.0294433	0.827226	-3.71727
ENSG00000129315	CCNT1	0.050111	6.21249	2.18398	0.0295073	0.827226	-3.73516
ENSG00000149150	SLC43A1	-0.110468	2.77044	-2.18218	0.0296408	0.827226	-3.56097
ENSG00000174915	PTDSS2	-0.114348	2.27955	-2.18178	0.0296706	0.827226	-3.53656
ENSG00000206177	HBM	-0.300365	3.64144	-2.17961	0.029832	0.827226	-3.63556
ENSG00000054267	ARID4B	0.0537605	7.3868	2.17929	0.0298561	0.827226	-3.74162
ENSG00000109906	ZBTB16	0.11265	3.80319	2.17861	0.0299072	0.827226	-3.6407
ENSG00000109445	ZNF330	0.0427728	4.41043	2.17756	0.029986	0.827226	-3.68526
ENSG00000008294	SPAG9	0.0489801	7.77876	2.17744	0.029995	0.827226	-3.73972
ENSG00000133706	LARS	0.0451653	6.69465	2.17717	0.0300147	0.827226	-3.75
ENSG00000256269	HMBS	-0.128991	3.27017	-2.17667	0.0300527	0.827226	-3.60806
ENSG00000198805	PNP	-0.0812521	5.83881	-2.17471	0.0302001	0.827226	-3.74884
ENSG00000162747	FCGR3B	0.113383	10.8588	2.1742	0.0302391	0.827226	-3.6822
ENSG00000243646	IL10RB	0.0444434	6.28828	2.17318	0.0303161	0.827226	-3.75748
ENSG00000122378	FAM213A	0.0871757	1.56164	2.17195	0.0304094	0.827226	-3.5283
ENSG00000119537	KDSR	0.0555065	4.05884	2.17099	0.0304826	0.827226	-3.67155
ENSG00000196653	ZNF502	0.112826	2.03298	2.17086	0.030492	0.827226	-3.54275
ENSG00000119541	VPS4B	0.0514084	6.75514	2.17048	0.0305215	0.827226	-3.76344
ENSG00000100852	ARHGAP5	0.0897152	6.19302	2.16902	0.0306323	0.827226	-3.76399
ENSG00000083896	YTHDC1	0.0508908	6.93688	2.16754	0.0307457	0.827226	-3.76874
ENSG00000170515	PA2G4	-0.0643604	5.26592	-2.16728	0.0307656	0.827226	-3.74913
ENSG00000130348	QRSL1	0.0546633	4.33181	2.16613	0.0308544	0.827226	-3.6985
ENSG00000166947	EPB42	-0.180744	6.84056	-2.16499	0.0309423	0.827226	-3.77293
ENSG00000228474	OST4	-0.0807679	6.31817	-2.16428	0.0309964	0.827226	-3.77565
ENSG00000198420	TCAF1	0.0521651	3.76741	2.16352	0.0310557	0.827226	-3.66436
ENSG00000134759	ELP2	0.0432753	5.94688	2.16344	0.0310619	0.827226	-3.77232
ENSG00000165914	TTC7B	-0.100676	1.94274	-2.16294	0.0311003	0.827226	-3.55988
ENSG00000172292	CERS6	0.0544156	5.51417	2.16257	0.0311287	0.827226	-3.76598
ENSG00000140299	BNIP2	0.0695783	7.50472	2.16146	0.0312149	0.827226	-3.77598
ENSG00000155592	ZKSCAN2	0.0605383	2.47157	2.1597	0.0313517	0.827226	-3.58381
ENSG00000142192	APP	0.0696944	5.77915	2.15909	0.0313993	0.827226	-3.77882
ENSG00000178381	ZFAND2A	-0.0611853	2.52287	-2.15904	0.0314036	0.827226	-3.59116
ENSG00000256223	ZNF10	0.0684589	3.27703	2.15891	0.031414	0.827226	-3.63389
ENSG00000137776	SLTM	0.051507	6.90175	2.15866	0.0314336	0.827226	-3.78669
ENSG00000205583	STAG3L1	-0.146363	1.87625	-2.15798	0.0314861	0.827226	-3.5644
ENSG00000150995	ITPR1	0.0525542	7.47903	2.1571	0.0315551	0.827226	-3.78546
ENSG00000108523	RNF167	-0.0706357	4.24235	-2.15396	0.0318021	0.827226	-3.72401
ENSG00000105700	KXD1	-0.0712793	4.25247	-2.15273	0.0318995	0.827226	-3.72872
ENSG00000165533	TTC8	0.0845042	1.00396	2.15263	0.0319073	0.827226	-3.55455
ENSG00000258315	C17orf49	-0.113823	2.16156	-2.15209	0.0319505	0.827226	-3.58607
ENSG00000146963	C7orf55-LUC7L2	0.0499199	5.99935	2.15094	0.0320416	0.827226	-3.79889
ENSG00000213625	LEPROT	-0.0605057	5.24551	-2.15009	0.0321094	0.827226	-3.7843
ENSG00000153922	CHD1	0.0677965	7.5393	2.14883	0.0322096	0.827226	-3.80092
ENSG00000163935	SFMBT1	0.0470934	4.12172	2.14812	0.0322661	0.827226	-3.7196
ENSG00000269220	LINC00528	-0.0814217	3.05864	-2.1479	0.032284	0.827226	-3.64756
ENSG00000239697	TNFSF12	-0.129415	1.16375	-2.14789	0.0322848	0.827226	-3.56578
ENSG00000108309	RUNDC3A	-0.218682	4.2871	-2.1474	0.0323236	0.827226	-3.74334
ENSG00000115604	IL18R1	0.0831921	5.12677	2.14724	0.0323368	0.827226	-3.78329
ENSG00000110048	OSBP	0.036995	5.64678	2.14683	0.0323695	0.827226	-3.80073
ENSG00000196867	ZFP28	0.0821681	2.59604	2.14672	0.0323784	0.827226	-3.61183
ENSG00000171552	BCL2L1	-0.16742	8.53134	-2.14661	0.0323875	0.827226	-3.78772
ENSG00000125827	TMX4	0.0555616	7.56127	2.146	0.0324358	0.827226	-3.80572
ENSG00000136932	C9orf156	0.0307424	5.27209	2.14517	0.0325025	0.827226	-3.79318
ENSG00000116903	EXOC8	0.0380189	6.25511	2.14203	0.0327567	0.827226	-3.81961
ENSG00000078747	ITCH	0.0513795	7.5669	2.14084	0.0328531	0.827226	-3.81615
ENSG00000137193	PIM1	-0.116817	8.3938	-2.14048	0.032882	0.827226	-3.80292
ENSG00000164142	FAM160A1	0.115642	1.53998	2.14022	0.0329029	0.827226	-3.58449
ENSG00000165119	HNRNPK	0.0456687	8.99112	2.13987	0.0329313	0.827226	-3.79261
ENSG00000091483	FH	0.0493299	4.35028	2.13858	0.0330363	0.827226	-3.75721
ENSG00000235192	AC009495.2	-0.0995847	1.05256	-2.13754	0.0331213	0.827226	-3.58211
ENSG00000128016	ZFP36	-0.0937487	5.2567	-2.13703	0.0331635	0.827226	-3.81057
ENSG00000167118	URM1	-0.0788783	3.07289	-2.13663	0.0331959	0.827226	-3.6679
ENSG00000143157	POGK	0.0271771	5.8431	2.13438	0.0333809	0.827226	-3.82899
ENSG00000162630	B3GALT2	0.163736	1.45185	2.1323	0.033552	0.827226	-3.59519
ENSG00000130741	EIF2S3	0.0436349	7.76789	2.13175	0.0335978	0.827226	-3.83231
ENSG00000137845	ADAM10	0.0579692	8.04611	2.13114	0.0336481	0.827226	-3.82798
ENSG00000079308	TNS1	-0.189692	7.25244	-2.13049	0.0337021	0.827226	-3.83889
ENSG00000142453	CARM1	-0.167226	4.63369	-2.12962	0.0337744	0.827226	-3.79726
ENSG00000206337	HCP5	-0.0506706	8.09214	-2.12914	0.0338142	0.827226	-3.83093
ENSG00000154767	XPC	0.0493705	6.29443	2.12914	0.0338147	0.827226	-3.84511
ENSG00000080947	CROCCP3	-0.0611452	3.32364	-2.12832	0.0338827	0.827226	-3.70009
ENSG00000168297	PXK	0.0547268	5.23585	2.12692	0.0339992	0.827226	-3.82817
ENSG00000139132	FGD4	0.0726272	6.27957	2.12692	0.0339996	0.827226	-3.84905
ENSG00000157500	APPL1	0.0621436	5.88699	2.12688	0.0340033	0.827226	-3.84404
ENSG00000181894	ZNF329	0.0553005	3.68392	2.12487	0.0341714	0.827226	-3.73123
ENSG00000100450	GZMH	-0.169019	4.98401	-2.12339	0.0342956	0.827226	-3.82185
ENSG00000181896	ZNF101	0.0419396	6.2176	2.12324	0.0343082	0.827226	-3.85546
ENSG00000115839	RAB3GAP1	0.044072	6.06876	2.12286	0.0343405	0.827226	-3.85555
ENSG00000142166	IFNAR1	0.0630112	7.2468	2.12189	0.0344222	0.827226	-3.85695
ENSG00000163939	PBRM1	0.0433479	6.95974	2.12175	0.034434	0.827226	-3.85951
ENSG00000204252	HLA-DOA	0.0895924	5.0198	2.12144	0.0344605	0.827226	-3.82174
ENSG00000124784	RIOK1	0.0513374	3.88894	2.1213	0.0344722	0.827226	-3.75577
ENSG00000118200	CAMSAP2	0.0852957	2.87747	2.121	0.0344976	0.827226	-3.67888
ENSG00000163393	SLC22A15	0.0626807	5.53132	2.1208	0.0345144	0.827226	-3.84989
ENSG00000239713	APOBEC3G	-0.0629434	5.63631	-2.11952	0.034623	0.827226	-3.85441
ENSG00000163297	ANTXR2	0.0424247	7.42805	2.11877	0.0346865	0.827226	-3.86129
ENSG00000106992	AK1	-0.189667	2.63858	-2.11858	0.034703	0.827226	-3.67572
ENSG00000198492	YTHDF2	0.0298195	5.77132	2.11827	0.0347296	0.827226	-3.8598
ENSG00000008226	DLEC1	-0.0890949	1.96561	-2.11579	0.034941	0.829853	-3.64112
ENSG00000285292		0.149014	2.51299	2.1147	0.0350342	0.829853	-3.6653
ENSG00000155827	RNF20	0.0514426	6.10271	2.1147	0.0350349	0.829853	-3.8721
ENSG00000255987	TOMM20P2	-0.0657937	2.99067	-2.11112	0.0353425	0.834397	-3.70669
ENSG00000120306	CYSTM1	-0.0958079	4.23715	-2.11054	0.0353932	0.834397	-3.81089
ENSG00000160321	ZNF208	0.184653	2.85488	2.11019	0.0354228	0.834397	-3.69136
ENSG00000111490	TBC1D30	0.078481	2.23036	2.10883	0.0355415	0.834599	-3.66919
ENSG00000121152	NCAPH	-0.0950212	0.956369	-2.10814	0.0356009	0.834599	-3.63008
ENSG00000134086	VHL	0.0354401	6.40063	2.10678	0.0357196	0.834599	-3.88957
ENSG00000255561	FDXACB1	0.0580411	2.14286	2.10607	0.0357817	0.834599	-3.66449
ENSG00000168710	AHCYL1	0.0369542	5.83358	2.1051	0.0358662	0.834599	-3.88709
ENSG00000080546	SESN1	0.0623629	4.97032	2.10223	0.036118	0.834599	-3.86076
ENSG00000085563	ABCB1	0.0797219	4.07235	2.10049	0.0362719	0.834599	-3.80699
ENSG00000081320	STK17B	0.0710517	9.08879	2.10013	0.0363032	0.834599	-3.86853
ENSG00000122218	COPA	0.0440083	7.29112	2.10008	0.0363077	0.834599	-3.89923
ENSG00000100129	EIF3L	0.0499731	7.8437	2.09909	0.0363957	0.834599	-3.89455
ENSG00000163156	SCNM1	-0.0660488	2.88111	-2.09885	0.0364172	0.834599	-3.72508
ENSG00000143258	USP21	-0.0686969	3.08283	-2.09865	0.0364348	0.834599	-3.73888
ENSG00000134955	SLC37A2	0.0760716	4.57562	2.09794	0.0364979	0.834599	-3.85274
ENSG00000012963	UBR7	0.0386024	4.69808	2.09793	0.0364983	0.834599	-3.8577
ENSG00000099783	HNRNPM	0.0428355	6.2194	2.09753	0.036534	0.834599	-3.90613
ENSG00000151576	QTRTD1	0.0371952	4.90189	2.09741	0.0365451	0.834599	-3.87045
ENSG00000148153	INIP	0.0484807	4.63927	2.09722	0.0365614	0.834599	-3.85614
ENSG00000005238	FAM214B	-0.104924	5.5922	-2.09536	0.0367273	0.834599	-3.90208
ENSG00000007944	MYLIP	0.0537817	6.25624	2.09485	0.0367728	0.834599	-3.91201
ENSG00000162433	AK4	-0.0871116	1.06849	-2.09335	0.0369073	0.834599	-3.65678
ENSG00000126262	FFAR2	-0.0757537	6.74329	-2.09285	0.0369522	0.834599	-3.9157
ENSG00000188554	NBR1	0.0409724	7.78758	2.0919	0.0370375	0.834599	-3.9087
ENSG00000072952	MRVI1	0.0721274	5.6654	2.09178	0.0370484	0.834599	-3.90867
ENSG00000178229	ZNF543	0.0474455	3.5803	2.09118	0.0371023	0.834599	-3.78793
ENSG00000156471	PTDSS1	0.0323721	6.30786	2.09098	0.0371207	0.834599	-3.91971
ENSG00000049192	ADAMTS6	0.0968627	1.58475	2.08991	0.0372173	0.834599	-3.67082
ENSG00000133069	TMCC2	-0.187324	4.28103	-2.08942	0.0372617	0.834599	-3.84918
ENSG00000134698	AGO4	0.0513827	7.93144	2.08942	0.0372618	0.834599	-3.91047
ENSG00000008441	NFIX	-0.176362	3.0452	-2.08795	0.0373942	0.835325	-3.75894
ENSG00000285730		0.069314	3.01109	2.08761	0.0374251	0.835325	-3.75332
ENSG00000100077	ADRBK2	0.0498289	6.39688	2.08545	0.0376218	0.836501	-3.93065
ENSG00000112425	EPM2A	0.0644391	3.2314	2.08487	0.0376751	0.836501	-3.77144
ENSG00000196517	SLC6A9	-0.21191	1.56814	-2.08206	0.0379316	0.836501	-3.68899
ENSG00000131981	LGALS3	-0.114475	5.75445	-2.08175	0.0379607	0.836501	-3.93096
ENSG00000069275	NUCKS1	0.0587089	6.75768	2.08036	0.0380882	0.836501	-3.94064
ENSG00000152454	ZNF256	0.0650751	2.67607	2.07996	0.0381252	0.836501	-3.73842
ENSG00000244509	APOBEC3C	-0.0851651	3.43055	-2.07732	0.0383697	0.836501	-3.80663
ENSG00000092841	MYL6	-0.105758	7.83636	-2.07661	0.0384357	0.836501	-3.93654
ENSG00000119004	CYP20A1	0.0349915	5.54335	2.07598	0.0384935	0.836501	-3.93473
ENSG00000277224	HIST1H2BF	-0.091806	3.76186	-2.07575	0.0385155	0.836501	-3.83739
ENSG00000171940	ZNF217	0.0393794	8.28285	2.07548	0.03854	0.836501	-3.93145
ENSG00000106327	TFR2	-0.17307	1.2107	-2.07519	0.0385672	0.836501	-3.69067
ENSG00000169762	TAPT1	0.0590612	5.15501	2.07372	0.038704	0.836501	-3.92587
ENSG00000198848	CES1	0.161625	3.56433	2.07366	0.0387099	0.836501	-3.82901
ENSG00000158987	RAPGEF6	0.0518328	7.54217	2.0736	0.0387152	0.836501	-3.94812
ENSG00000111642	CHD4	0.0562579	7.19727	2.07249	0.0388198	0.836501	-3.95361
ENSG00000173480	ZNF417	0.0382312	5.79812	2.07143	0.0389189	0.836501	-3.95099
ENSG00000116191	RALGPS2	0.0973176	6.32598	2.07119	0.0389412	0.836501	-3.95636
ENSG00000124641	MED20	-0.0347071	3.72339	-2.07043	0.0390131	0.836501	-3.84421
ENSG00000120008	WDR11	0.0382573	6.49952	2.06973	0.0390788	0.836501	-3.96128
ENSG00000151914	DST	0.0767527	5.08915	2.06931	0.0391182	0.836501	-3.93212
ENSG00000153187	HNRNPU	0.0539513	9.45209	2.06857	0.0391876	0.836501	-3.92143
ENSG00000186792	HYAL3	-0.150841	0.853536	-2.06835	0.0392086	0.836501	-3.69543
ENSG00000186448	ZNF197	0.0591292	4.69046	2.06827	0.0392159	0.836501	-3.91176
ENSG00000004939	SLC4A1	-0.189807	8.65388	-2.06782	0.039259	0.836501	-3.93695
ENSG00000156172	C8orf37	0.100294	0.830062	2.06712	0.0393254	0.836501	-3.69572
ENSG00000167207	NOD2	-0.10612	5.28836	-2.06573	0.0394567	0.836501	-3.95059
ENSG00000163629	PTPN13	0.0950363	3.22139	2.06569	0.0394611	0.836501	-3.80477
ENSG00000122512	PMS2	0.0297255	4.31639	2.06547	0.0394813	0.836501	-3.89454
ENSG00000110713	NUP98	0.0438542	7.97488	2.06545	0.0394837	0.836501	-3.95645
ENSG00000196470	SIAH1	0.042289	4.48645	2.06458	0.0395662	0.836501	-3.91076
ENSG00000151458	ANKRD50	0.0620692	4.71404	2.06449	0.0395744	0.836501	-3.92539
ENSG00000146530	VWDE	0.238634	1.66495	2.06318	0.0396996	0.837075	-3.71977
ENSG00000117174	ZNHIT6	0.0632945	4.11075	2.06179	0.0398321	0.837075	-3.88291
ENSG00000055211	GINM1	0.0552828	4.15815	2.06001	0.0400032	0.837075	-3.8973
ENSG00000139651	ZNF740	0.0299196	5.98141	2.0597	0.0400329	0.837075	-3.97625
ENSG00000172638	EFEMP2	-0.142816	0.914426	-2.05967	0.0400363	0.837075	-3.71017
ENSG00000114388	NPRL2	-0.0654097	4.3241	-2.05952	0.0400507	0.837075	-3.90888
ENSG00000163798	SLC4A1AP	0.0366843	4.82732	2.05924	0.0400772	0.837075	-3.94038
ENSG00000100722	ZC3H14	0.0392136	5.31146	2.05873	0.0401261	0.837075	-3.96057
ENSG00000140526	ABHD2	0.0704156	8.05348	2.05742	0.0402527	0.837123	-3.9692
ENSG00000100815	TRIP11	0.063759	6.1843	2.056	0.0403899	0.837123	-3.98558
ENSG00000158623	COPG2	0.0600984	3.6967	2.05595	0.0403947	0.837123	-3.86612
ENSG00000067191	CACNB1	-0.109985	1.58103	-2.05549	0.0404394	0.837123	-3.7326
ENSG00000114331	ACAP2	0.066991	8.50308	2.05532	0.0404562	0.837123	-3.9655
ENSG00000082397	EPB41L3	0.0689222	4.93038	2.05337	0.0406456	0.838946	-3.95596
ENSG00000120262	CCDC170	0.0782607	2.57098	2.05306	0.0406758	0.838946	-3.78804
ENSG00000103066	PLA2G15	-0.107473	2.06495	-2.05076	0.0409004	0.841248	-3.76262
ENSG00000253729	PRKDC	0.0576964	7.88779	2.0504	0.0409351	0.841248	-3.9872
ENSG00000021776	AQR	0.0471964	6.88556	2.04989	0.0409851	0.841248	-3.99875
ENSG00000205639	MFSD2B	-0.160989	2.82919	-2.04733	0.0412377	0.841833	-3.81761
ENSG00000136213	CHST12	-0.0908493	4.61728	-2.04712	0.0412578	0.841833	-3.94993
ENSG00000198836	OPA1	0.0610207	6.54771	2.04707	0.0412625	0.841833	-4.0046
ENSG00000117859	OSBPL9	0.0404857	6.29194	2.04432	0.0415347	0.841833	-4.00932
ENSG00000086827	ZW10	0.0465176	3.90814	2.04372	0.0415945	0.841833	-3.90377
ENSG00000164663	USP49	-0.0449035	3.56927	-2.04323	0.0416427	0.841833	-3.88168
ENSG00000066422	ZBTB11	0.0454094	6.27685	2.04136	0.0418294	0.841833	-4.01458
ENSG00000215790	SLC35E2	-0.117786	3.3949	-2.03853	0.042113	0.841833	-3.87649
ENSG00000204120	GIGYF2	0.0375359	6.79295	2.03835	0.0421305	0.841833	-4.02098
ENSG00000048392	RRM2B	0.0752208	6.30431	2.03788	0.0421779	0.841833	-4.02119
ENSG00000087470	DNM1L	0.0496196	5.52988	2.03751	0.0422148	0.841833	-4.00815
ENSG00000115421	PAPOLG	0.0549115	5.95277	2.03717	0.0422491	0.841833	-4.01906
ENSG00000141469	SLC14A1	-0.131389	5.34976	-2.03508	0.04246	0.841833	-4.00816
ENSG00000188171	ZNF626	0.0886392	3.58862	2.03491	0.0424769	0.841833	-3.88762
ENSG00000198346	ZNF813	0.085956	3.47859	2.03234	0.0427383	0.841833	-3.88517
ENSG00000102900	NUP93	0.0417377	4.91855	2.03191	0.042781	0.841833	-3.99525
ENSG00000205339	IPO7	0.0585676	6.25639	2.03109	0.0428649	0.841833	-4.0333
ENSG00000128039	SRD5A3	0.0887567	2.37651	2.03042	0.0429328	0.841833	-3.8106
ENSG00000256053	APOPT1	-0.055967	3.01862	-2.0295	0.0430273	0.841833	-3.85935
ENSG00000286030		-0.0779937	3.92333	-2.02554	0.043434	0.841833	-3.93969
ENSG00000144401	METTL21A	0.0414914	3.686	2.02532	0.0434564	0.841833	-3.91947
ENSG00000137177	KIF13A	0.0534132	6.58598	2.02449	0.043542	0.841833	-4.04663
ENSG00000120438	TCP1	0.0414322	6.39226	2.02411	0.043581	0.841833	-4.04755
ENSG00000101265	RASSF2	0.04528	9.67793	2.02274	0.0437224	0.841833	-4.00079
ENSG00000101367	MAPRE1	0.0349026	6.54506	2.02264	0.0437331	0.841833	-4.0509
ENSG00000124228	DDX27	0.0423338	5.14652	2.0224	0.0437586	0.841833	-4.0225
ENSG00000166946	CCNDBP1	-0.0608497	7.46102	-2.02082	0.0439227	0.841833	-4.04801
ENSG00000159111	MRPL10	-0.0666273	3.24981	-2.02043	0.0439632	0.841833	-3.89371
ENSG00000177575	CD163	0.0775781	5.31657	2.0204	0.0439664	0.841833	-4.03432
ENSG00000176658	MYO1D	-0.0635072	3.08668	-2.01948	0.0440614	0.841833	-3.8801
ENSG00000171148	TADA3	-0.0897187	4.47023	-2.01937	0.0440734	0.841833	-3.99675
ENSG00000275700	AATF	0.0319231	5.77991	2.01851	0.0441631	0.841833	-4.05131
ENSG00000128394	APOBEC3F	-0.0874984	1.77099	-2.01804	0.0442117	0.841833	-3.8018
ENSG00000145687	SSBP2	0.053109	5.57066	2.0179	0.0442264	0.841833	-4.04638
ENSG00000126107	HECTD3	-0.0830193	3.89424	-2.0177	0.0442478	0.841833	-3.95491
ENSG00000047315	POLR2B	0.0527206	7.15312	2.01763	0.0442546	0.841833	-4.05785
ENSG00000196371	FUT4	-0.0350887	4.41646	-2.01762	0.0442562	0.841833	-3.9948
ENSG00000164576	SAP30L	0.0303531	5.6479	2.01723	0.0442973	0.841833	-4.05073
ENSG00000172113	NME6	0.0273671	5.01555	2.01673	0.0443494	0.841833	-4.02825
ENSG00000188641	DPYD	0.0470733	8.33617	2.01539	0.04449	0.841833	-4.04354
ENSG00000167565	SERTAD3	-0.061407	3.24777	-2.01457	0.0445763	0.841833	-3.90774
ENSG00000142669	SH3BGRL3	-0.11862	5.24251	-2.01455	0.0445781	0.841833	-4.04509
ENSG00000283293		-0.174138	14.3542	-2.0134	0.0446997	0.841833	-3.89113
ENSG00000154217	PITPNC1	0.0286374	5.70246	2.013	0.0447423	0.841833	-4.05873
ENSG00000111775	COX6A1	-0.0826073	4.83583	-2.01181	0.0448683	0.841833	-4.03144
ENSG00000179262	RAD23A	-0.147683	4.24978	-2.01141	0.0449106	0.841833	-3.99581
ENSG00000178163	ZNF518B	0.0517995	6.00197	2.01103	0.0449501	0.841833	-4.0687
ENSG00000136999	NOV	0.104831	3.44109	2.01103	0.0449507	0.841833	-3.93103
ENSG00000168280	KIF5C	0.0801126	3.7115	2.00984	0.0450764	0.841833	-3.94305
ENSG00000152969	JAKMIP1	-0.118169	2.64792	-2.00933	0.0451316	0.841833	-3.86704
ENSG00000251301	RP11-81H14.2	-0.15793	3.22919	-2.0085	0.0452192	0.841833	-3.91639
ENSG00000066084	DIP2B	0.0447788	7.58218	2.00832	0.0452383	0.841833	-4.07016
ENSG00000238243	OR2W3	-0.200057	4.16924	-2.00813	0.0452591	0.841833	-3.99436
ENSG00000236104	ZBTB22	-0.0801841	3.67238	-2.00812	0.0452599	0.841833	-3.95343
ENSG00000170852	KBTBD2	0.0463793	6.84212	2.00471	0.0456254	0.841833	-4.08371
ENSG00000013503	POLR3B	0.0464526	3.64323	2.00348	0.0457577	0.841833	-3.95474
ENSG00000175606	TMEM70	0.0616969	3.53143	2.00229	0.0458857	0.841833	-3.94912
ENSG00000100348	TXN2	-0.0783898	2.67175	-2.0013	0.0459921	0.841833	-3.88345
ENSG00000197044	ZNF441	0.108306	4.37178	2.00062	0.0460661	0.841833	-4.01482
ENSG00000059804	SLC2A3	0.062166	8.39156	2.0002	0.0461116	0.841833	-4.0703
ENSG00000104129	DNAJC17	-0.0688492	3.25169	-1.99804	0.0463459	0.841833	-3.93381
ENSG00000145391	SETD7	0.0452687	5.05241	1.99793	0.0463579	0.841833	-4.06527
ENSG00000160741	CRTC2	-0.0945603	3.03449	-1.997	0.0464593	0.841833	-3.92006
ENSG00000135932	CAB39	0.0525627	7.64356	1.99668	0.0464947	0.841833	-4.09094
ENSG00000124549	BTN2A3P	-0.0677389	1.80909	-1.99638	0.046527	0.841833	-3.8427
ENSG00000139644	TMBIM6	0.0337492	9.06348	1.99619	0.0465478	0.841833	-4.06431
ENSG00000175984	DENND2C	0.10673	1.51309	1.99584	0.0465863	0.841833	-3.82743
ENSG00000197951	ZNF71	-0.0718469	2.84727	-1.99499	0.0466791	0.841833	-3.90432
ENSG00000113580	NR3C1	0.0447466	8.11763	1.99404	0.0467831	0.841833	-4.08792
ENSG00000176390	CRLF3	0.0422977	7.11621	1.99347	0.0468461	0.841833	-4.10286
ENSG00000224086	LL22NC03-86G7.1	0.0964451	1.1325	1.99317	0.0468784	0.841833	-3.82211
ENSG00000196411	EPHB4	0.126839	2.98311	1.99313	0.0468832	0.841833	-3.92298
ENSG00000123684	LPGAT1	0.0572745	7.85675	1.99297	0.0469006	0.841833	-4.09386
ENSG00000170296	GABARAP	-0.0558059	6.74062	-1.99184	0.0470254	0.841833	-4.10766
ENSG00000112144	ICK	0.0406135	4.36182	1.99173	0.047037	0.841833	-4.03373
ENSG00000163900	TMEM41A	0.0322451	4.15113	1.99091	0.0471282	0.841833	-4.01916
ENSG00000100372	SLC25A17	0.0411573	2.97249	1.98889	0.0473513	0.841833	-3.92298
ENSG00000116641	DOCK7	0.0636096	3.88383	1.98872	0.0473701	0.841833	-4.00163
ENSG00000134330	IAH1	-0.0396775	4.17342	-1.98799	0.0474512	0.841833	-4.02899
ENSG00000177076	ACER2	-0.0713006	1.59797	-1.98754	0.0475014	0.841833	-3.84506
ENSG00000276216	CH17-373J23.1	-0.0923265	1.44558	-1.98681	0.0475819	0.841833	-3.8398
ENSG00000124198	ARFGEF2	0.0295222	6.24656	1.98641	0.0476265	0.841833	-4.1167
ENSG00000168661	ZNF30	0.0734674	1.74659	1.9864	0.0476275	0.841833	-3.84983
ENSG00000071794	HLTF	0.0685317	4.40998	1.98586	0.0476877	0.841833	-4.04531
ENSG00000115317	HTRA2	-0.0580777	4.017	-1.98579	0.0476959	0.841833	-4.02321
ENSG00000115649	CNPPD1	-0.11714	5.59053	-1.98388	0.0479093	0.841833	-4.11088
ENSG00000105723	GSK3A	-0.0727136	3.63144	-1.9826	0.048053	0.841833	-3.99839
ENSG00000151893	CACUL1	0.0526105	7.23526	1.98254	0.0480599	0.841833	-4.12168
ENSG00000279491	RP11-810P12.7	0.0675987	1.71415	1.98241	0.0480746	0.841833	-3.85909
ENSG00000139946	PELI2	0.0568757	6.52855	1.98209	0.0481096	0.841833	-4.12578
ENSG00000070269	TMEM260	0.0495222	5.51871	1.98124	0.0482059	0.841833	-4.11316
ENSG00000008311	AASS	0.0940555	2.54053	1.98091	0.0482423	0.841833	-3.90131
ENSG00000164611	PTTG1	-0.0838423	1.67915	-1.98006	0.0483382	0.841833	-3.86164
ENSG00000163993	S100P	-0.217569	3.79882	-1.97927	0.048428	0.841833	-4.03726
ENSG00000154814	OXNAD1	0.0565065	6.86816	1.97837	0.0485295	0.841833	-4.13195
ENSG00000158796	DEDD	-0.049395	3.15949	-1.97774	0.0486003	0.841833	-3.96363
ENSG00000125944	HNRNPR	0.0586297	6.99925	1.97708	0.0486759	0.841833	-4.13401
ENSG00000153339	TRAPPC8	0.0515019	7.14735	1.977	0.048685	0.841833	-4.13296
ENSG00000272106	RP11-345P4.9	-0.0845479	1.14628	-1.97696	0.0486896	0.841833	-3.84751
ENSG00000196628	TCF4	0.0793385	5.13538	1.97558	0.0488462	0.841833	-4.10448
ENSG00000164134	NAA15	0.058762	5.81877	1.97527	0.0488812	0.841833	-4.12981
ENSG00000254788	CKLF-CMTM1	0.119006	1.3921	1.97418	0.0490053	0.841833	-3.86021
ENSG00000088970	KIZ	-0.0420432	4.42344	-1.97364	0.0490666	0.841833	-4.07397
ENSG00000102580	DNAJC3	0.0565409	6.86548	1.9734	0.0490944	0.841833	-4.14095
ENSG00000100697	DICER1	0.0583996	8.32453	1.97316	0.0491216	0.841833	-4.12181
ENSG00000102054	RBBP7	0.0386623	5.55878	1.9714	0.0493234	0.841833	-4.13083
ENSG00000143612	C1orf43	-0.0422734	5.52731	-1.97109	0.0493589	0.841833	-4.13369
ENSG00000112697	TMEM30A	0.066108	7.5506	1.9703	0.0494504	0.841833	-4.1406
ENSG00000104695	PPP2CB	0.05046	3.89591	1.97027	0.0494528	0.841833	-4.03679
ENSG00000065183	WDR3	0.0454832	4.91245	1.96998	0.0494869	0.841833	-4.1067
ENSG00000166130	IKBIP	0.0738913	4.93034	1.96977	0.0495108	0.841833	-4.11192
ENSG00000138029	HADHB	0.0331023	6.32132	1.96961	0.0495287	0.841833	-4.14853
ENSG00000117394	SLC2A1	-0.111455	5.71621	-1.96944	0.0495486	0.841833	-4.13956
ENSG00000270062	RP11-248J18.3	0.116196	1.31111	1.96914	0.0495833	0.841833	-3.86357
ENSG00000163882	POLR2H	-0.0617226	3.01528	-1.96672	0.0498628	0.841833	-3.96731
ENSG00000135837	CEP350	0.04741	8.03737	1.96665	0.0498715	0.841833	-4.13998
ENSG00000211791	TRAV13-2	0.099661	1.15542	1.96632	0.0499087	0.841833	-3.86273
ENSG00000197771	MCMBP	0.0443098	6.76274	1.9657	0.0499812	0.841833	-4.15582

## Sheet: ST3_Phase3
ST3: Significant Genes (p-value < 0.05) Identified in Phase 3 Cross-Sectional Analysis of FEV1
ENSG	geneID	logFC	AveExpr	t	P.Value	adj.P.Val	B
ENSG00000196507	TCEAL3	-0.145939	1.19509	-3.65069	0.000293935	0.999862	-0.0185391
ENSG00000170365	SMAD1	-0.172581	1.55358	-3.05477	0.0023933	0.999862	-1.61106
ENSG00000151023	ENKUR	-0.191186	1.5757	-3.03869	0.00252188	0.999862	-1.65076
ENSG00000171574	ZNF584	0.111592	1.33627	3.03044	0.00259033	0.999862	-1.69345
ENSG00000274641	HIST1H2BO	-0.143368	2.39412	-3.02693	0.00261994	0.999862	-1.66007
ENSG00000170917	NUDT6	0.117842	1.08727	3.00224	0.0028372	0.999862	-1.78114
ENSG00000206341	HLA-H	-0.230768	6.4847	-2.92086	0.00367554	0.999862	-2.05736
ENSG00000258056	RP11-644F5.11	0.10507	1.08147	2.90105	0.00391125	0.999862	-2.02465
ENSG00000177427	MIEF2	0.0758417	2.75191	2.82112	0.00500863	0.999862	-2.19939
ENSG00000041988	THAP3	0.0641205	2.90361	2.81682	0.00507495	0.999862	-2.21824
ENSG00000089127	OAS1	-0.168323	6.24458	-2.74206	0.00636186	0.999862	-2.53289
ENSG00000160214	RRP1	0.084857	2.27653	2.73074	0.00658056	0.999862	-2.40183
ENSG00000144134	RABL2A	0.102103	1.81432	2.7289	0.00661674	0.999862	-2.39958
ENSG00000248905	FMN1	-0.282037	3.19221	-2.72856	0.00662358	0.999862	-2.459
ENSG00000067113	PPAP2A	0.115771	1.10294	2.71625	0.00687048	0.999862	-2.44402
ENSG00000175550	DRAP1	-0.0873093	4.05068	-2.71574	0.00688084	0.999862	-2.55113
ENSG00000059122	FLYWCH1	0.108152	3.07742	2.6959	0.00729695	0.999862	-2.52661
ENSG00000111364	DDX55	0.0533925	3.65177	2.63872	0.008626	0.999862	-2.71062
ENSG00000122557	HERPUD2	-0.0413157	5.49151	-2.626	0.00894962	0.999862	-2.82641
ENSG00000104783	KCNN4	0.118877	2.89886	2.62139	0.0090697	0.999862	-2.69122
ENSG00000142227	EMP3	-0.0568421	6.06079	-2.60813	0.00942279	0.999862	-2.87032
ENSG00000116586	LAMTOR2	-0.0629019	3.69593	-2.60065	0.00962734	0.999862	-2.80876
ENSG00000230092	RP11-206L10.8	0.145171	0.76175	2.59206	0.00986716	0.999862	-2.72156
ENSG00000140987	ZSCAN32	-0.0319958	4.39068	-2.58815	0.00997808	0.999862	-2.88431
ENSG00000135114	OASL	-0.173995	4.7671	-2.58084	0.0101884	0.999862	-2.91989
ENSG00000131849	ZNF132	0.104915	2.8907	2.57108	0.0104756	0.999862	-2.81059
ENSG00000160783	PMF1	-0.0519794	4.25578	-2.56504	0.0106569	0.999862	-2.93187
ENSG00000256274	TAS2R64P	-0.169461	2.43402	-2.54462	0.0112903	0.999862	-2.843
ENSG00000136933	RABEPK	-0.0604462	3.02591	-2.54286	0.0113464	0.999862	-2.88813
ENSG00000010803	SCMH1	0.0685871	3.1486	2.53946	0.0114557	0.999862	-2.90331
ENSG00000002549	LAP3	-0.129581	5.72709	-2.52962	0.0117771	0.999862	-3.05981
ENSG00000132256	TRIM5	-0.0686999	4.76467	-2.52794	0.0118327	0.999862	-3.04559
ENSG00000171943	SRGAP2C	-0.0609229	4.65131	-2.52783	0.0118362	0.999862	-3.04112
ENSG00000006282	SPATA20	0.163445	2.44581	2.52558	0.0119111	0.999862	-2.88234
ENSG00000183647	ZNF530	0.0635506	2.62127	2.51233	0.0123609	0.999862	-2.92394
ENSG00000173218	VANGL1	-0.101967	2.28513	-2.5114	0.012393	0.999862	-2.90724
ENSG00000123130	ACOT9	-0.0600883	5.24805	-2.50895	0.0124781	0.999862	-3.10414
ENSG00000164116	GUCY1A3	-0.132227	3.2171	-2.48761	0.0132406	0.999862	-3.03144
ENSG00000100462	PRMT5	-0.0667207	4.07964	-2.48582	0.0133064	0.999862	-3.10558
ENSG00000146085	MUT	0.0518916	4.05298	2.47522	0.0137023	0.999862	-3.12593
ENSG00000125148	MT2A	-0.144118	3.36686	-2.47249	0.0138058	0.999862	-3.07997
ENSG00000136827	TOR1A	-0.0417346	4.80207	-2.46764	0.0139916	0.999862	-3.18765
ENSG00000169860	P2RY1	-0.0947514	2.17208	-2.4513	0.0146337	0.999862	-3.03163
ENSG00000196141	SPATS2L	-0.142833	2.02106	-2.45028	0.0146744	0.999862	-3.0265
ENSG00000217930	PAM16	0.113482	1.27567	2.44972	0.0146969	0.999862	-3.00512
ENSG00000004809	SLC22A16	-0.155288	1.27509	-2.44617	0.0148405	0.999862	-3.01295
ENSG00000115750	TAF1B	-0.0639578	3.68363	-2.43898	0.0151348	0.999862	-3.18169
ENSG00000130303	BST2	-0.083435	5.05618	-2.42708	0.0156332	0.999862	-3.28873
ENSG00000184979	USP18	-0.186252	1.47634	-2.39934	0.0168517	0.999862	-3.11063
ENSG00000092010	PSME1	-0.055322	7.38717	-2.38923	0.0173163	0.999862	-3.34949
ENSG00000107443	CCNJ	-0.0460087	3.38187	-2.38792	0.0173777	0.999862	-3.26818
ENSG00000007944	MYLIP	-0.0643062	6.0256	-2.38746	0.017399	0.999862	-3.38656
ENSG00000164054	SHISA5	-0.0702251	6.83917	-2.38598	0.0174684	0.999862	-3.37426
ENSG00000245498	RP11-677M14.7	0.0909389	1.77109	2.37539	0.0179708	0.999862	-3.16678
ENSG00000148110	HIATL1	-0.0637714	6.07264	-2.37018	0.0182224	0.999862	-3.42443
ENSG00000121289	CEP89	0.0655783	2.11693	2.36611	0.0184213	0.999862	-3.20461
ENSG00000162227	TAF6L	0.0729811	2.07735	2.3576	0.0188432	0.999862	-3.21744
ENSG00000188825	LINC00910	0.100085	2.60707	2.35267	0.0190916	0.999862	-3.26805
ENSG00000232859	LYRM9	0.0633012	2.26862	2.35044	0.019205	0.999862	-3.24643
ENSG00000143995	MEIS1	-0.128865	1.98837	-2.34867	0.0192953	0.999862	-3.23408
ENSG00000187535	IFT140	0.0919846	0.944941	2.33447	0.0200335	0.999862	-3.22961
ENSG00000104472	CHRAC1	-0.0569706	3.11211	-2.33403	0.0200568	0.999862	-3.35812
ENSG00000177409	SAMD9L	-0.109049	7.82889	-2.32945	0.0203001	0.999862	-3.46309
ENSG00000182712	CMC4	0.143683	1.43168	2.32603	0.0204838	0.999862	-3.25256
ENSG00000197020	ZNF100	-0.111944	4.31759	-2.32551	0.0205121	0.999862	-3.48168
ENSG00000227051	C14orf132	0.19604	1.32242	2.32154	0.0207273	0.999862	-3.25776
ENSG00000228140	RP3-467K16.4	-0.103495	1.17343	-2.31179	0.0212638	0.999862	-3.27581
ENSG00000164951	PDP1	-0.042979	5.52234	-2.3044	0.0216786	0.999862	-3.56907
ENSG00000182463	TSHZ2	0.136511	3.33962	2.29939	0.0219644	0.999862	-3.4457
ENSG00000185651	UBE2L3	-0.0346171	5.38684	-2.29712	0.0220946	0.999862	-3.58322
ENSG00000196204	RNF216P1	0.0776675	2.88844	2.28091	0.023045	0.999862	-3.44264
ENSG00000156587	UBE2L6	-0.0954936	5.49631	-2.27668	0.0232989	0.999862	-3.62843
ENSG00000186818	LILRB4	-0.0987499	2.55231	-2.27232	0.0235629	0.999862	-3.43132
ENSG00000022976	ZNF839	0.0423211	3.48351	2.2671	0.0238829	0.999862	-3.53303
ENSG00000283189		0.185828	1.77415	2.26659	0.0239141	0.999862	-3.3821
ENSG00000137878	GCOM1	0.22261	1.08128	2.26466	0.0240336	0.999862	-3.3613
ENSG00000261222	CTD-2006K23.1	-0.147157	2.00313	-2.26138	0.0242374	0.999862	-3.41291
ENSG00000244045	TMEM199	-0.0300087	4.5685	-2.25969	0.024343	0.999862	-3.63564
ENSG00000091127	PUS7	-0.0722414	2.16725	-2.25445	0.0246734	0.999862	-3.43479
ENSG00000137656	BUD13	-0.0385474	3.91335	-2.25388	0.0247094	0.999862	-3.60205
ENSG00000234127	TRIM26	-0.0488937	4.09711	-2.25065	0.024915	0.999862	-3.6233
ENSG00000174171	RP11-23P13.6	0.157596	1.04773	2.24618	0.0252025	0.999862	-3.39516
ENSG00000249731	RP11-259O2.3	-0.106032	3.06828	-2.24189	0.0254809	0.999862	-3.54686
ENSG00000013374	NUB1	-0.0486423	5.83558	-2.23779	0.0257493	0.999862	-3.71228
ENSG00000137965	IFI44	-0.200738	4.55569	-2.23698	0.0258028	0.999862	-3.68421
ENSG00000165029	ABCA1	-0.113816	6.51043	-2.23548	0.0259013	0.999862	-3.70788
ENSG00000140105	WARS	-0.0979501	6.85596	-2.23526	0.0259162	0.999862	-3.6991
ENSG00000153029	MR1	-0.0386164	5.71362	-2.23475	0.0259501	0.999862	-3.7187
ENSG00000141664	ZCCHC2	-0.0932138	5.6883	-2.23393	0.0260042	0.999862	-3.72014
ENSG00000223865	HLA-DPB1	-0.0768263	7.4274	-2.2338	0.0260132	0.999862	-3.68286
ENSG00000119655	NPC2	-0.0624476	5.94944	-2.23316	0.026055	0.999862	-3.72153
ENSG00000259030	FPGT-TNNI3K	0.123675	0.743121	2.22928	0.0263145	0.999862	-3.42213
ENSG00000196498	NCOR2	0.0964313	2.95304	2.22003	0.0269409	0.999862	-3.57266
ENSG00000155313	USP25	-0.0372972	6.89987	-2.21823	0.027064	0.999862	-3.73372
ENSG00000275713	HIST1H2BH	-0.0731341	3.63324	-2.21821	0.0270651	0.999862	-3.64956
ENSG00000170581	STAT2	-0.0816002	6.15761	-2.21473	0.0273051	0.999862	-3.75789
ENSG00000162961	DPY30	0.0977744	2.65355	2.2126	0.0274533	0.999862	-3.55771
ENSG00000120690	ELF1	-0.0386174	7.44481	-2.21187	0.0275037	0.999862	-3.72808
ENSG00000107020	PLGRKT	-0.058321	2.64446	-2.2105	0.0275997	0.999862	-3.56456
ENSG00000178028	DMAP1	0.0433644	4.14309	2.21005	0.0276307	0.999862	-3.70902
ENSG00000255339	RP11-411B6.6	-0.219971	0.804933	-2.2091	0.0276977	0.999862	-3.46074
ENSG00000268555	RP11-678G14.3	-0.224695	3.46378	-2.20591	0.0279218	0.999862	-3.65941
ENSG00000178665	ZNF713	-0.109346	0.771215	-2.2054	0.0279578	0.999862	-3.46558
ENSG00000139531	SUOX	-0.0799152	1.74851	-2.20334	0.0281039	0.999862	-3.50414
ENSG00000126709	IFI6	-0.178147	5.00298	-2.19693	0.0285616	0.999862	-3.78556
ENSG00000143110	C1orf162	-0.0547007	5.74374	-2.19634	0.0286039	0.999862	-3.7986
ENSG00000204642	HLA-F	-0.0589211	7.75506	-2.19496	0.0287038	0.999862	-3.75013
ENSG00000185885	IFITM1	-0.0834397	7.95376	-2.18747	0.0292491	0.999862	-3.75653
ENSG00000173852	DPY19L1	-0.051583	4.19601	-2.1873	0.029262	0.999862	-3.76221
ENSG00000136108	CKAP2	-0.0645253	3.95522	-2.18669	0.0293067	0.999862	-3.74278
ENSG00000128789	PSMG2	-0.0377968	4.74508	-2.18537	0.0294038	0.999862	-3.79887
ENSG00000184221	OLIG1	0.132374	1.36697	2.18108	0.029722	0.999862	-3.52294
ENSG00000105939	ZC3HAV1	-0.0475121	7.60626	-2.17844	0.029919	0.999862	-3.79006
ENSG00000025772	TOMM34	0.0683873	2.46843	2.17551	0.030139	0.999862	-3.61182
ENSG00000104635	SLC39A14	0.0754567	1.77213	2.17543	0.0301454	0.999862	-3.55488
ENSG00000136231	IGF2BP3	-0.112337	1.63987	-2.17523	0.03016	0.999862	-3.55027
ENSG00000056277	ZNF280C	-0.0586276	2.33081	-2.17422	0.0302369	0.999862	-3.60407
ENSG00000196126	HLA-DRB1	-0.0862761	7.71086	-2.17269	0.0303522	0.999862	-3.79809
ENSG00000060982	BCAT1	-0.129895	3.53435	-2.1712	0.0304652	0.999862	-3.73929
ENSG00000112293	GPLD1	0.137204	1.01314	2.16441	0.030986	0.999862	-3.54104
ENSG00000119431	HDHD3	0.0778032	2.1023	2.16394	0.0310219	0.999862	-3.60033
ENSG00000125868	DSTN	-0.0505876	4.11546	-2.1576	0.0315159	0.999862	-3.81607
ENSG00000183726	TMEM50A	-0.0454816	6.4129	-2.15663	0.0315913	0.999862	-3.87297
ENSG00000153896	ZNF599	0.0786987	1.56515	2.15636	0.0316128	0.999862	-3.57675
ENSG00000068784	SRBD1	-0.0475882	5.17921	-2.15094	0.0320407	0.999862	-3.8843
ENSG00000105771	SMG9	0.0626313	2.5645	2.15048	0.0320775	0.999862	-3.66977
ENSG00000147592	LACTB2	-0.0593025	2.5531	-2.14885	0.0322077	0.999862	-3.67426
ENSG00000140259	MFAP1	-0.0523444	4.59827	-2.14541	0.0324827	0.999862	-3.87255
ENSG00000188313	PLSCR1	-0.109124	6.09405	-2.14494	0.032521	0.999862	-3.90115
ENSG00000138646	HERC5	-0.16863	5.15511	-2.1425	0.0327174	0.999862	-3.90071
ENSG00000221963	APOL6	-0.0755551	7.93375	-2.14209	0.0327505	0.999862	-3.84921
ENSG00000174136	RGMB	0.1085	2.56777	2.14161	0.0327894	0.999862	-3.68353
ENSG00000188242	PP7080	0.0784407	1.97411	2.14127	0.032817	0.999862	-3.63318
ENSG00000280128	XXbac-BPG283O16.9	0.0583393	4.12501	2.13969	0.0329459	0.999862	-3.85084
ENSG00000069849	ATP1B3	-0.0555786	4.64628	-2.13894	0.0330068	0.999862	-3.88798
ENSG00000110002	VWA5A	-0.0583087	2.85898	-2.13593	0.033253	0.999862	-3.73084
ENSG00000129158	SERGEF	0.046958	3.70499	2.1338	0.0334275	0.999862	-3.82406
ENSG00000126522	ASL	-0.0567033	3.44104	-2.13327	0.0334719	0.999862	-3.80023
ENSG00000105662	CRTC1	0.0985132	1.82954	2.13062	0.0336904	0.999862	-3.6412
ENSG00000138286	FAM149B1	0.0327671	3.85221	2.12908	0.0338187	0.999862	-3.84844
ENSG00000185621	LMLN	-0.0869302	1.48731	-2.12794	0.0339134	0.999862	-3.62632
ENSG00000261136	RP11-37C7.3	0.0706825	1.38786	2.11745	0.0347984	0.999862	-3.63815
ENSG00000115738	ID2	-0.0661262	5.59968	-2.11588	0.0349328	0.999862	-3.96109
ENSG00000059758	CDK17	-0.0318867	6.16081	-2.11528	0.0349845	0.999862	-3.96031
ENSG00000223496	EXOSC6	0.0507526	4.37988	2.11176	0.0352867	0.999862	-3.92393
ENSG00000141858	SAMD1	0.0796896	1.17895	2.11077	0.035372	0.999862	-3.64032
ENSG00000104856	RELB	0.0698638	3.28747	2.10842	0.0355758	0.999862	-3.82835
ENSG00000132530	XAF1	-0.121515	6.11133	-2.10816	0.0355989	0.999862	-3.97434
ENSG00000054277	OPN3	-0.0591754	3.32136	-2.09838	0.0364582	0.999862	-3.8567
ENSG00000216490	IFI30	-0.0720093	8.16086	-2.09791	0.0364997	0.999862	-3.92615
ENSG00000152778	IFIT5	-0.113316	5.78151	-2.09757	0.0365301	0.999862	-3.99755
ENSG00000270157	RP5-894A10.6	0.0779442	2.53279	2.09663	0.0366133	0.999862	-3.76703
ENSG00000173950	XXYLT1	-0.0647118	2.12474	-2.0953	0.0367318	0.999862	-3.73299
ENSG00000163565	IFI16	-0.064776	7.50508	-2.09383	0.0368638	0.999862	-3.96216
ENSG00000019991	HGF	-0.0739055	3.76734	-2.09284	0.0369523	0.999862	-3.914
ENSG00000167553	TUBA1C	-0.0569411	4.5686	-2.09259	0.036975	0.999862	-3.97576
ENSG00000134326	CMPK2	-0.16872	3.92974	-2.08787	0.037401	0.999862	-3.93978
ENSG00000136816	TOR1B	-0.064523	4.67723	-2.08783	0.0374049	0.999862	-3.99127
ENSG00000134321	RSAD2	-0.246629	5.13106	-2.0877	0.0374166	0.999862	-4.00851
ENSG00000285581		0.103017	0.951782	2.08376	0.0377757	0.999862	-3.67918
ENSG00000101363	MANBAL	-0.0470374	2.62324	-2.08143	0.0379893	0.999862	-3.80894
ENSG00000131067	GGT7	0.0851883	1.77604	2.08085	0.0380429	0.999862	-3.72629
ENSG00000277072	STAG3L2	0.0753578	2.68246	2.07332	0.038741	0.999862	-3.82811
ENSG00000215039	CD27-AS1	-0.065211	2.00629	-2.07312	0.0387594	0.999862	-3.76263
ENSG00000127957	PMS2P3	0.0590294	2.28997	2.0727	0.0387991	0.999862	-3.78852
ENSG00000094914	AAAS	0.0595336	2.18628	2.07034	0.0390208	0.999862	-3.78143
ENSG00000070814	TCOF1	0.0613922	3.52013	2.0671	0.0393264	0.999862	-3.93386
ENSG00000109919	MTCH2	-0.0377602	4.54135	-2.06367	0.0396523	0.999862	-4.03044
ENSG00000236753	MKLN1-AS	-0.0896151	0.551658	-2.0611	0.0398976	0.999862	-3.70923
ENSG00000166927	MS4A7	-0.0789922	6.00771	-2.06027	0.0399778	0.999862	-4.06987
ENSG00000137200	CMTR1	-0.0468936	5.55517	-2.05641	0.0403493	0.999862	-4.07742
ENSG00000147164	SNX12	-0.0323061	3.91999	-2.05535	0.040452	0.999862	-3.99952
ENSG00000137449	CPEB2	-0.0619178	5.32572	-2.05333	0.0406484	0.999862	-4.0804
ENSG00000137700	SLC37A4	0.0575097	2.21679	2.05037	0.0409374	0.999862	-3.82062
ENSG00000176915	ANKLE2	0.0251655	6.00428	2.04898	0.0410739	0.999862	-4.09206
ENSG00000130479	MAP1S	0.0850501	1.84308	2.04736	0.0412338	0.999862	-3.7914
ENSG00000213185	FAM24B	-0.0904644	1.15942	-2.0471	0.0412592	0.999862	-3.75001
ENSG00000215012	C22orf29	0.0547835	3.33321	2.04565	0.0414028	0.999862	-3.95342
ENSG00000279236	RP11-120K19.3	-0.110597	2.04791	-2.04379	0.0415871	0.999862	-3.82018
ENSG00000187608	ISG15	-0.190125	4.36545	-2.04356	0.0416099	0.999862	-4.05898
ENSG00000271862	RP11-343L5.2	-0.0584226	1.96714	-2.04291	0.0416744	0.999862	-3.81412
ENSG00000164924	YWHAZ	-0.0322696	9.05676	-2.04263	0.0417019	0.999862	-3.99171
ENSG00000144048	DUSP11	-0.0267511	4.72179	-2.03852	0.042113	0.999862	-4.0882
ENSG00000101856	PGRMC1	-0.0719553	4.82145	-2.03751	0.0422147	0.999862	-4.09478
ENSG00000172500	FIBP	-0.044401	3.95513	-2.03644	0.0423224	0.999862	-4.03766
ENSG00000170265	ZNF282	0.0595191	2.79423	2.03531	0.0424359	0.999862	-3.90976
ENSG00000187116	LILRA5	-0.0958462	6.85151	-2.0318	0.0427919	0.999862	-4.1062
ENSG00000023697	DERA	-0.0397958	3.83018	-2.0304	0.0429348	0.999862	-4.03805
ENSG00000148773	MKI67	-0.105854	3.57522	-2.02924	0.0430528	0.999862	-4.015
ENSG00000179886	TIGD5	0.0644267	2.59981	2.02805	0.0431749	0.999862	-3.90114
ENSG00000166262	FAM227B	0.0837892	1.00329	2.02665	0.0433181	0.999862	-3.77649
ENSG00000166974	MAPRE2	-0.0356985	5.83865	-2.02575	0.0434108	0.999862	-4.13719
ENSG00000132294	EFR3A	-0.0320863	6.53151	-2.02537	0.0434507	0.999862	-4.12826
ENSG00000069869	NEDD4	-0.0582974	4.51446	-2.02153	0.0438479	0.999862	-4.10995
ENSG00000138642	HERC6	-0.0821719	4.26981	-2.0112	0.0449315	0.999862	-4.11269
ENSG00000232063	RP11-307E17.8	-0.106996	1.04029	-2.01086	0.0449678	0.999862	-3.80699
ENSG00000133106	EPSTI1	-0.147737	5.10909	-2.01076	0.0449779	0.999862	-4.15657
ENSG00000007047	MARK4	0.0779913	1.62997	2.0077	0.0453036	0.999862	-3.84465
ENSG00000181135	ZNF707	0.0535758	2.48032	2.00375	0.0457276	0.999862	-3.93171
ENSG00000184831	APOO	-0.071597	0.966358	-2.00316	0.0457906	0.999862	-3.81629
ENSG00000255374	TAS2R43	-0.175594	1.2511	-2.00241	0.0458724	0.999862	-3.83257
ENSG00000187741	FANCA	-0.0855929	2.65213	-1.99432	0.046752	0.999862	-3.97092
ENSG00000224356	RP11-151A6.4	-0.0973644	0.923027	-1.99422	0.0467631	0.999862	-3.8286
ENSG00000180900	SCRIB	0.0792364	2.53579	1.99172	0.0470372	0.999862	-3.95774
ENSG00000215845	TSTD1	0.0500729	3.54665	1.99123	0.047092	0.999862	-4.07972
ENSG00000100292	HMOX1	-0.0813608	4.53107	-1.99094	0.0471236	0.999862	-4.16797
ENSG00000130772	MED18	-0.0389893	3.984	-1.98785	0.0474662	0.999862	-4.13146
ENSG00000226067	CH17-118O6.2	-0.069068	3.57555	-1.98673	0.0475901	0.999862	-4.09349
ENSG00000169756	LIMS1	-0.0539361	6.70371	-1.98618	0.0476518	0.999862	-4.19766
ENSG00000286834		-0.0949572	5.87724	-1.9814	0.048187	0.999862	-4.22015
ENSG00000103415	HMOX2	-0.0380461	4.63401	-1.98139	0.0481883	0.999862	-4.19113
ENSG00000085185	BCORL1	0.112847	1.22949	1.98077	0.0482572	0.999862	-3.86348
ENSG00000172775	FAM192A	-0.0255144	5.821	-1.97985	0.048361	0.999862	-4.22389
ENSG00000107872	FBXL15	0.0819875	1.93036	1.97972	0.048376	0.999862	-3.9154
ENSG00000130699	TAF4	0.0887039	2.05481	1.9786	0.0485029	0.999862	-3.93175
ENSG00000277149	TYW1B	-0.0653775	2.62993	-1.97852	0.048512	0.999862	-3.99936
ENSG00000178149	DALRD3	0.0482652	3.28395	1.97654	0.0487357	0.999862	-4.07542
ENSG00000187210	GCNT1	-0.0511783	4.37946	-1.97502	0.0489085	0.999862	-4.18894
ENSG00000180855	ZNF443	0.0710374	2.46321	1.97453	0.0489652	0.999862	-3.98326
ENSG00000091483	FH	-0.0436656	4.20895	-1.9727	0.0491743	0.999862	-4.17917
ENSG00000116863	ADPRHL2	-0.0429895	4.21155	-1.96913	0.0495838	0.999862	-4.18569
ENSG00000127080	IPPK	0.0344144	3.32857	1.96844	0.049663	0.999862	-4.09609
ENSG00000160932	LY6E	-0.132137	4.13949	-1.96798	0.049716	0.999862	-4.18289
ENSG00000239282	GATSL3	0.105855	1.0665	1.96708	0.0498201	0.999862	-3.87666
ENSG00000068394	GPKOW	-0.0446492	3.68904	-1.96606	0.0499385	0.999862	-4.1427

## Sheet: ST4_FEV1Change
ST4: Significant Genes (p-value < 0.05) Identified in FEV1 Chnage Analysis
ENSG	geneID	logFC	AveExpr	t	P.Value	adj.P.Val	B
ENSG00000257176	RP11-996F15.2	0.00183478	2.59943	3.29126	0.00108024	0.999922	-4.67466
ENSG00000185909	KLHDC8B	-0.00205144	2.65328	-3.22974	0.00133481	0.999922	-4.90927
ENSG00000173068	BNC2	0.0024844	1.69852	2.94455	0.00341092	0.999922	-5.5803
ENSG00000196511	TPK1	0.00077799	4.7694	2.90856	0.00382054	0.999922	-6.16515
ENSG00000025772	TOMM34	-0.00108861	2.74642	-2.90826	0.00382416	0.999922	-5.8807
ENSG00000010626	LRRC23	-0.00125098	1.26875	-2.82532	0.00494495	0.999922	-5.88796
ENSG00000213462	ERV3-1	-0.00107978	6.3777	-2.81668	0.00507743	0.999922	-6.49828
ENSG00000244041	LINC01011	0.000831541	2.33398	2.79964	0.00534801	0.999922	-6.10161
ENSG00000135898	GPR55	-0.00155096	2.41097	-2.78432	0.00560244	0.999922	-6.17956
ENSG00000124243	BCAS4	-0.00093824	3.48625	-2.75642	0.00609417	0.999922	-6.42149
ENSG00000145431	PDGFC	0.00117229	2.04105	2.72441	0.00670612	0.999922	-6.26371
ENSG00000251660	AC007036.5	0.00283049	1.36723	2.70133	0.00718135	0.999922	-6.22341
ENSG00000170836	PPM1D	0.000516195	4.48833	2.67998	0.0076476	0.999922	-6.77
ENSG00000172116	CD8B	-0.00163308	4.95137	-2.63933	0.00861115	0.999922	-6.91841
ENSG00000100342	APOL1	-0.00113473	4.40422	-2.62624	0.00894381	0.999922	-6.90475
ENSG00000168421	RHOH	-0.000494328	5.95634	-2.61921	0.00912713	0.999922	-7.01899
ENSG00000167768	KRT1	0.00288188	5.17308	2.60237	0.00958032	0.999922	-6.99397
ENSG00000102078	SLC25A14	0.00079717	2.40649	2.60061	0.0096289	0.999922	-6.64557
ENSG00000124226	RNF114	-0.000383312	6.0937	-2.59878	0.00967936	0.999922	-7.07745
ENSG00000137942	FNBP1L	0.00103506	2.99095	2.57369	0.0103986	0.999922	-6.80987
ENSG00000168556	ING2	0.00100317	2.1548	2.56103	0.0107789	0.999922	-6.70625
ENSG00000111962	UST	0.000943908	2.71106	2.52778	0.0118383	0.999922	-6.87046
ENSG00000203999	LINC01270	0.0016652	2.53704	2.52505	0.0119293	0.999922	-6.88087
ENSG00000132383	RPA1	0.000588544	5.63196	2.51566	0.012247	0.999922	-7.26959
ENSG00000236255	AC009404.2	0.000919951	2.15917	2.51199	0.0123732	0.999922	-6.82737
ENSG00000173114	LRRN3	-0.00204929	3.78966	-2.50318	0.0126808	0.999922	-7.14376
ENSG00000132801	ZSWIM3	-0.000753283	2.22623	-2.48619	0.0132934	0.999922	-6.91268
ENSG00000125445	MRPS7	-0.000781804	3.77214	-2.46806	0.0139759	0.999922	-7.21547
ENSG00000153563	CD8A	-0.00151109	5.83913	-2.46399	0.0141334	0.999922	-7.4053
ENSG00000232855	AF131217.1	0.00156872	1.6295	2.45119	0.0146385	0.999922	-6.88536
ENSG00000151718	WWC2	0.000817288	2.8499	2.44446	0.0149104	0.999922	-7.10762
ENSG00000163596	ICA1L	0.00115774	1.25938	2.43685	0.0152234	0.999922	-6.87752
ENSG00000211660	IGLV2-23	-0.00249735	1.49341	-2.43346	0.0153647	0.999922	-6.94719
ENSG00000116199	FAM20B	0.000787403	5.53233	2.42881	0.0155606	0.999922	-7.47835
ENSG00000180667	YOD1	0.00191948	7.69515	2.42211	0.0158462	0.999922	-7.50742
ENSG00000110104	CCDC86	-0.0012971	1.54553	-2.41673	0.0160792	0.999922	-6.98043
ENSG00000119950	MXI1	0.00177239	7.79123	2.41231	0.0162727	0.999922	-7.52899
ENSG00000182518	FAM104B	0.00117164	1.64831	2.40256	0.016707	0.999922	-7.01051
ENSG00000151023	ENKUR	0.00191316	1.58107	2.39359	0.0171152	0.999922	-7.01746
ENSG00000185436	IFNLR1	-0.00130466	1.98394	-2.39125	0.0172232	0.999922	-7.10173
ENSG00000162735	PEX19	-0.000341565	4.98079	-2.38696	0.0174228	0.999922	-7.5487
ENSG00000211795	TRAV8-6	-0.00111632	1.34558	-2.38194	0.0176591	0.999922	-7.02463
ENSG00000166046	TCP11L2	0.000906224	7.83822	2.37915	0.0177915	0.999922	-7.6063
ENSG00000253982	CTD-2336O2.1	0.00168967	4.10216	2.37735	0.0178774	0.999922	-7.46051
ENSG00000141034	GID4	0.00116155	4.04128	2.3742	0.0180283	0.999922	-7.46994
ENSG00000072694	FCGR2B	-0.00114415	5.35591	-2.37214	0.018128	0.999922	-7.60838
ENSG00000287839		-0.000809689	4.34441	-2.36917	0.0182722	0.999922	-7.52935
ENSG00000019995	ZRANB1	0.000847122	6.50193	2.35537	0.0189556	0.999922	-7.67604
ENSG00000171451	DSEL	-0.00163884	2.13899	-2.35098	0.0191779	0.999922	-7.23361
ENSG00000170476	MZB1	-0.00221494	1.67773	-2.34735	0.0193634	0.999922	-7.18147
ENSG00000163251	FZD5	0.00133324	1.63422	2.34602	0.0194316	0.999922	-7.14764
ENSG00000076770	MBNL3	0.00177584	8.42858	2.33165	0.0201837	0.999922	-7.7034
ENSG00000186591	UBE2H	0.00118502	7.59316	2.32822	0.0203668	0.999922	-7.73035
ENSG00000126249	PDCD2L	-0.00107192	0.888921	-2.32715	0.0204241	0.999922	-7.10172
ENSG00000122378	FAM213A	-0.00101479	1.56164	-2.32708	0.0204281	0.999922	-7.18729
ENSG00000184182	UBE2F	0.000663228	5.10054	2.31678	0.0209881	0.999922	-7.71654
ENSG00000092931	MFSD11	0.000323682	4.31534	2.31105	0.0213058	0.999922	-7.65578
ENSG00000153561	RMND5A	0.000817584	7.62667	2.31046	0.0213387	0.999922	-7.77014
ENSG00000108100	CCNY	0.000403315	6.72272	2.30684	0.0215415	0.999922	-7.78868
ENSG00000231047	GCNT1P3	0.00119431	0.87483	2.29629	0.0221432	0.999922	-7.17491
ENSG00000137133	HINT2	-0.000897296	2.08624	-2.29327	0.0223178	0.999922	-7.34778
ENSG00000106789	CORO2A	-0.000691966	3.56735	-2.28565	0.0227642	0.999922	-7.61876
ENSG00000176597	B3GNT5	0.00108686	4.11615	2.28236	0.0229595	0.999922	-7.70548
ENSG00000010030	ETV7	-0.00279503	1.52101	-2.27634	0.0233202	0.999922	-7.32345
ENSG00000173598	NUDT4	0.00107821	6.38517	2.27441	0.0234371	0.999922	-7.86019
ENSG00000118276	B4GALT6	0.00157897	0.894959	2.27363	0.023484	0.999922	-7.21465
ENSG00000181788	SIAH2	0.00169693	6.80927	2.27211	0.0235766	0.999922	-7.86452
ENSG00000163349	HIPK1	0.000766937	7.89595	2.27186	0.0235919	0.999922	-7.85179
ENSG00000117586	TNFSF4	0.00121273	3.18078	2.24432	0.0253234	0.999922	-7.619
ENSG00000278030	TRBV7-9	-0.00156837	1.75444	-2.23307	0.0260621	0.999922	-7.42878
ENSG00000146426	TIAM2	0.000918524	3.56678	2.22995	0.0262703	0.999922	-7.73251
ENSG00000100030	MAPK1	0.000484522	8.77039	2.22033	0.0269205	0.999922	-7.9404
ENSG00000143324	XPR1	0.00054399	5.46532	2.21613	0.0272095	0.999922	-7.96565
ENSG00000206561	COLQ	0.00111725	2.85751	2.21577	0.0272343	0.999922	-7.62828
ENSG00000189060	H1F0	0.00174153	4.3671	2.2124	0.0274678	0.999922	-7.87283
ENSG00000185630	PBX1	0.00170421	2.97108	2.20961	0.0276622	0.999922	-7.6572
ENSG00000163568	AIM2	-0.00116292	3.14896	-2.20488	0.0279949	0.999922	-7.73802
ENSG00000249459	ZNF286B	0.00121113	1.56686	2.20369	0.0280792	0.999922	-7.44802
ENSG00000274021	RP11-823E8.3	0.00106316	1.03497	2.1989	0.0284208	0.999922	-7.40784
ENSG00000198948	MFAP3L	0.00146755	4.7719	2.19687	0.0285666	0.999922	-7.94699
ENSG00000211675	IGLC1	-0.00308833	1.83587	-2.1809	0.0297357	0.999922	-7.5978
ENSG00000081026	MAGI3	0.000911982	2.25955	2.18055	0.0297619	0.999922	-7.60782
ENSG00000211890	IGHA2	-0.00329442	1.8402	-2.17624	0.0300849	0.999922	-7.61802
ENSG00000135778	NTPCR	-0.000685476	4.29212	-2.17571	0.0301245	0.999922	-7.95749
ENSG00000100490	CDKL1	0.00097955	3.81093	2.17563	0.0301307	0.999922	-7.87349
ENSG00000256060	TRAPPC2B	0.00128117	0.775243	2.17486	0.0301893	0.999922	-7.42185
ENSG00000176410	DNAJC30	-0.00092271	1.4519	-2.1746	0.0302086	0.999922	-7.51075
ENSG00000105227	PRX	-0.00164606	1.01806	-2.17195	0.0304094	0.999922	-7.46769
ENSG00000286010		0.00176142	2.13075	2.1674	0.0307564	0.999922	-7.60835
ENSG00000135452	TSPAN31	-0.000484901	4.01734	-2.167	0.0307871	0.999922	-7.94123
ENSG00000181135	ZNF707	-0.0012207	2.68303	-2.16352	0.0310551	0.999922	-7.73457
ENSG00000148737	TCF7L2	0.00113924	2.662	2.15915	0.0313948	0.999922	-7.73342
ENSG00000129116	PALLD	0.00117706	1.99352	2.15758	0.0315178	0.999922	-7.62126
ENSG00000211752	TRBV27	-0.00122979	1.40206	-2.15315	0.0318661	0.999922	-7.55459
ENSG00000211893	IGHG2	-0.00275446	2.46603	-2.15219	0.0319427	0.999922	-7.75357
ENSG00000183155	RABIF	0.000339777	4.30314	2.15122	0.0320195	0.999922	-8.01082
ENSG00000237522	NONOP2	0.000971881	0.906361	2.14661	0.0323869	0.999922	-7.49391
ENSG00000148175	STOM	0.00102774	7.31916	2.13973	0.0329429	0.999922	-8.1518
ENSG00000212443	SNORA53	-0.00453903	2.83757	-2.13815	0.0330721	0.999922	-7.85093
ENSG00000047597	XK	0.00196413	5.39834	2.13802	0.033082	0.999922	-8.11996
ENSG00000115641	FHL2	0.00180335	0.908833	2.13278	0.0335126	0.999922	-7.5327
ENSG00000184232	OAF	-0.00115598	1.96719	-2.1307	0.0336847	0.999922	-7.70126
ENSG00000260404	RP11-384K6.6	-0.00102454	2.16595	-2.12355	0.0342826	0.999922	-7.73536
ENSG00000104450	SPAG1	0.000954377	2.48604	2.12213	0.0344023	0.999922	-7.78299
ENSG00000136819	C9orf78	0.00148053	7.5052	2.12037	0.0345514	0.999922	-8.18997
ENSG00000116678	LEPR	0.00135684	3.50562	2.10956	0.0354781	0.999922	-7.96993
ENSG00000170464	DNAJC18	-0.00072751	1.98891	-2.10885	0.0355395	0.999922	-7.72999
ENSG00000259529	RP11-468E2.4	-0.00255758	1.79432	-2.10733	0.0356713	0.999922	-7.73527
ENSG00000133606	MKRN1	0.00149497	10.008	2.10411	0.0359533	0.999922	-8.15116
ENSG00000118689	FOXO3	0.00118649	8.05307	2.09646	0.0366292	0.999922	-8.22733
ENSG00000158578	ALAS2	0.00232696	10.5373	2.09339	0.0369039	0.999922	-8.15942
ENSG00000123091	RNF11	0.00145656	6.8699	2.09304	0.036935	0.999922	-8.25315
ENSG00000124214	STAU1	0.000767835	5.53755	2.09192	0.0370358	0.999922	-8.23388
ENSG00000124098	FAM210B	0.00169065	8.03136	2.08803	0.0373875	0.999922	-8.24686
ENSG00000164610	RP9	-0.000656355	2.22143	-2.08766	0.0374205	0.999922	-7.81161
ENSG00000125991	ERGIC3	-0.000649242	4.3663	-2.08706	0.037475	0.999922	-8.15747
ENSG00000150867	PIP4K2A	0.00118006	8.84932	2.08654	0.0375227	0.999922	-8.22673
ENSG00000282988		-0.00109939	3.529	-2.08461	0.0376988	0.999922	-8.05799
ENSG00000135045	C9orf40	0.00111271	2.23447	2.08114	0.0380169	0.999922	-7.81872
ENSG00000211896	IGHG1	-0.00243609	2.94704	-2.07968	0.0381513	0.999922	-7.97522
ENSG00000104361	NIPAL2	0.00173545	3.582	2.07956	0.0381619	0.999922	-8.03209
ENSG00000237773	AC003075.4	0.00101408	1.17327	2.07919	0.0381964	0.999922	-7.66481
ENSG00000112293	GPLD1	0.001274	1.22575	2.07901	0.0382129	0.999922	-7.67195
ENSG00000204348	DXO	-0.00108166	2.04167	-2.07852	0.0382586	0.999922	-7.80583
ENSG00000135090	TAOK3	0.000374046	7.03762	2.07655	0.0384412	0.999922	-8.28726
ENSG00000266412	NCOA4	0.000991627	10.4807	2.07148	0.0389142	0.999922	-8.19868
ENSG00000101782	RIOK3	0.00139346	8.23961	2.05918	0.040083	0.999922	-8.30104
ENSG00000108960	MMD	0.00124919	5.08658	2.05503	0.040484	0.999922	-8.27429
ENSG00000111886	GABRR2	0.00123674	1.50553	2.05502	0.0404851	0.999922	-7.77899
ENSG00000198431	TXNRD1	0.000492608	6.83484	2.05214	0.0407652	0.999922	-8.33816
ENSG00000133048	CHI3L1	-0.0017391	5.56723	-2.05038	0.0409379	0.999922	-8.31345
ENSG00000118777	ABCG2	0.00174112	2.11424	2.05034	0.0409418	0.999922	-7.85461
ENSG00000136999	NOV	-0.00117309	3.44109	-2.05014	0.0409608	0.999922	-8.10411
ENSG00000122224	LY9	-0.000541654	5.21543	-2.0454	0.0414281	0.999922	-8.3102
ENSG00000174365	SNHG11	-0.000855148	1.64826	-2.04324	0.0416421	0.999922	-7.81485
ENSG00000101444	AHCY	-0.000773434	3.03076	-2.04153	0.0418124	0.999922	-8.05129
ENSG00000159346	ADIPOR1	0.00151964	10.1611	2.04079	0.0418865	0.999922	-8.27661
ENSG00000144283	PKP4	0.00055759	4.24182	2.04048	0.041917	0.999922	-8.23014
ENSG00000163629	PTPN13	0.00103749	3.22139	2.04041	0.0419241	0.999922	-8.06534
ENSG00000253882	RP11-61L23.2	-0.00104594	3.23648	-2.03929	0.0420366	0.999922	-8.08255
ENSG00000175029	CTBP2	0.000395447	5.74895	2.03891	0.042075	0.999922	-8.35308
ENSG00000278774	U2	-0.00575815	8.17197	-2.03881	0.0420844	0.999922	-8.33204
ENSG00000154165	GPR15	-0.00150632	4.75115	-2.03325	0.0426458	0.999922	-8.30534
ENSG00000175746	C15orf54	0.00202096	1.5052	2.02967	0.0430096	0.999922	-7.79667
ENSG00000162367	TAL1	0.00148229	5.20012	2.02856	0.043123	0.999922	-8.33186
ENSG00000286699		-0.000679191	2.3871	-2.02834	0.0431456	0.999922	-7.96057
ENSG00000135018	UBQLN1	0.00046134	7.20911	2.02808	0.0431721	0.999922	-8.3842
ENSG00000135631	RAB11FIP5	-0.00126431	2.03462	-2.02708	0.0432755	0.999922	-7.9065
ENSG00000134809	TIMM10	-0.000961126	1.69047	-2.02693	0.0432903	0.999922	-7.85668
ENSG00000117305	HMGCL	-0.000497589	3.96225	-2.02379	0.0436146	0.999922	-8.23374
ENSG00000124570	SERPINB6	0.000539989	5.10511	2.02328	0.0436672	0.999922	-8.35018
ENSG00000213920	MDP1	-0.00129958	1.34107	-2.02185	0.043815	0.999922	-7.8259
ENSG00000112715	VEGFA	-0.000749672	3.10532	-2.02062	0.0439434	0.999922	-8.11334
ENSG00000041353	RAB27B	0.00129389	5.38899	2.01533	0.0444966	0.999922	-8.3757
ENSG00000173436	MINOS1	-0.000439326	3.97628	-2.01001	0.0450589	0.999922	-8.26141
ENSG00000198502	HLA-DRB5	-0.00177121	6.01453	-2.00762	0.0453139	0.999922	-8.4207
ENSG00000236790	LINC00299	0.00115075	4.4288	2.00287	0.0458235	0.999922	-8.31662
ENSG00000188352	FOCAD	0.000570522	5.2059	2.00246	0.0458675	0.999922	-8.39661
ENSG00000100614	PPM1A	0.000964226	7.87717	2.00212	0.0459037	0.999922	-8.42422
ENSG00000177628	GBA	-0.000852107	3.94303	-2.00205	0.0459116	0.999922	-8.28417
ENSG00000152766	ANKRD22	-0.00161902	1.79577	-1.99936	0.0462027	0.999922	-7.96081
ENSG00000066926	FECH	0.00173404	7.24642	1.99759	0.0463952	0.999922	-8.44365
ENSG00000275793	RIMBP3	-0.00145736	2.10544	-1.99613	0.0465549	0.999922	-7.98355
ENSG00000198876	DCAF12	0.00159697	10.1661	1.99502	0.0466761	0.999922	-8.36791
ENSG00000107669	ATE1	0.000437409	4.9403	1.99119	0.0470969	0.999922	-8.40011
ENSG00000280828	RP11-274B21.1	0.000656325	3.78996	1.9882	0.0474274	0.999922	-8.2701
ENSG00000256581	NLRP9P	0.00122001	1.13216	1.98809	0.0474395	0.999922	-7.87015
ENSG00000051108	HERPUD1	-0.000310025	6.24286	-1.98496	0.0477883	0.999922	-8.47233
ENSG00000197632	SERPINB2	-0.00119353	1.14457	-1.98449	0.0478411	0.999922	-7.88652
ENSG00000182318	ZSCAN22	-0.000615938	2.32604	-1.97813	0.0485561	0.999922	-8.04748
ENSG00000060138	YBX3	0.00152069	8.68604	1.97468	0.0489488	0.999922	-8.45783
ENSG00000186153	WWOX	0.000527963	2.91513	1.97247	0.0492004	0.999922	-8.14979
ENSG00000163993	S100P	-0.00241039	3.79882	-1.97205	0.0492492	0.999922	-8.33434
ENSG00000201998	SNORA23	-0.00328638	2.15872	-1.97008	0.0494752	0.999922	-8.06277
ENSG00000121903	ZSCAN20	-0.000585309	1.96799	-1.96978	0.0495101	0.999922	-8.01005
ENSG00000118096	IFT46	-0.000613266	2.2544	-1.96941	0.0495518	0.999922	-8.05867
ENSG00000116857	TMEM9	-0.000951523	2.73089	-1.96871	0.0496333	0.999922	-8.1405
ENSG00000167333	TRIM68	-0.000491609	3.31086	-1.9686	0.0496459	0.999922	-8.23225
ENSG00000187193	MT1X	-0.00131546	1.4855	-1.96766	0.049754	0.999922	-7.94488

## Sheet: ST5_Longitudinal
ST5: Significant Genes (p-value < 0.05) Identified in Longitudinal Analysis of FEV1
ensg	geneID	logFC	AveExpr	t	P.Value	adj.P.Val	B
ENSG00000149483	TMEM138	-0.00141297	-0.00347522	-3.81562	0.00015613	0.865195	-2.86782
ENSG00000133935	C14orf1	-0.00122461	-0.000512715	-3.7031	0.000241232	0.865195	-3.2781
ENSG00000152894	PTPRK	-0.00212395	-0.0180759	-3.70167	0.000242555	0.865195	-3.28325
ENSG00000084110	HAL	0.00115488	-0.00852363	3.5	0.000514753	0.865195	-3.98944
ENSG00000169877	AHSP	-0.003501	-0.0350958	-3.4714	0.000571093	0.865195	-4.08655
ENSG00000035664	DAPK2	0.00139689	-0.00916229	3.47131	0.000571294	0.865195	-4.08688
ENSG00000258476	RP11-76E17.3	0.0024728	-0.0321553	3.46158	0.000591741	0.865195	-4.11973
ENSG00000114770	ABCC5	0.00114286	-0.00605537	3.45514	0.000605664	0.865195	-4.14146
ENSG00000166347	CYB5A	-0.00111004	-0.00451311	-3.41836	0.00069117	0.865195	-4.26471
ENSG00000188690	UROS	-0.000866417	-0.00212713	-3.38948	0.000766044	0.865195	-4.3606
ENSG00000164142	FAM160A1	0.00205646	-0.0293124	3.38251	0.000785229	0.865195	-4.38364
ENSG00000122642	FKBP9	0.00175747	0.00716411	3.29989	0.00104924	0.865195	-4.6532
ENSG00000179909	ZNF154	-0.00136341	-0.0197612	-3.29385	0.00107145	0.865195	-4.67265
ENSG00000247774	PCED1B-AS1	-0.00101777	-0.00517723	-3.27953	0.0011259	0.865195	-4.71866
ENSG00000159339	PADI4	0.00189572	-0.017501	3.27381	0.00114838	0.865195	-4.737
ENSG00000186184	POLR1D	-0.00121461	-0.00121077	-3.23801	0.00129862	0.865195	-4.85095
ENSG00000160179	ABCG1	0.0016762	-0.0113856	3.23114	0.00132948	0.865195	-4.87271
ENSG00000145354	CISD2	-0.00215141	-0.0125046	-3.22241	0.00136967	0.865195	-4.90027
ENSG00000186205	MARC1	0.00141041	-0.0121285	3.2192	0.00138469	0.865195	-4.91037
ENSG00000263731	RP11-498C9.15	-0.00168632	-0.0113358	-3.19306	0.00151306	0.865195	-4.99237
ENSG00000108384	RAD51C	-0.00146667	-0.00920117	-3.18243	0.00156835	0.865195	-5.02555
ENSG00000157045	NTAN1	-0.00145091	-0.000555397	-3.18116	0.00157507	0.865195	-5.0295
ENSG00000176749	CDK5R1	0.00133987	-0.0114874	3.17121	0.00162872	0.865195	-5.06044
ENSG00000158578	ALAS2	-0.00348559	-0.0397375	-3.17114	0.00162911	0.865195	-5.06066
ENSG00000163297	ANTXR2	0.000900273	-0.00239472	3.13647	0.00182955	0.868139	-5.16774
ENSG00000183960	KCNH8	-0.00227127	-0.0416114	-3.12926	0.00187397	0.868139	-5.18986
ENSG00000182389	CACNB4	0.00228674	-0.0250106	3.12399	0.00190708	0.868139	-5.206
ENSG00000101464	PIGU	-0.000953126	-0.00458618	-3.12185	0.00192066	0.868139	-5.21254
ENSG00000229473	RGS17P1	0.00177925	-0.00987693	3.10762	0.00201338	0.868139	-5.25598
ENSG00000175970	UNC119B	0.000785327	-0.00197578	3.08244	0.00218761	0.868139	-5.33236
ENSG00000118777	ABCG2	-0.00265126	-0.0249026	-3.07437	0.00224633	0.868139	-5.35672
ENSG00000224177	LINC00570	-0.00269537	-0.0253421	-3.07055	0.00227458	0.868139	-5.36821
ENSG00000196517	SLC6A9	-0.00364583	-0.0180426	-3.06199	0.00233921	0.868139	-5.39397
ENSG00000158769	F11R	0.00115114	-0.00486682	3.02927	0.00260196	0.868139	-5.49171
ENSG00000182518	FAM104B	-0.00174266	-0.0131602	-3.02465	0.00264112	0.868139	-5.50542
ENSG00000169413	RNASE6	0.00130992	-0.006521	3.02043	0.00267746	0.868139	-5.51795
ENSG00000138678	AGPAT9	0.0011546	-0.00676355	3.01532	0.00272198	0.868139	-5.53307
ENSG00000249459	ZNF286B	-0.00216151	-0.00967295	-3.00986	0.0027703	0.868139	-5.54921
ENSG00000155749	ALS2CR12	-0.00225579	-0.0114153	-2.99302	0.00292442	0.868139	-5.59881
ENSG00000152102	FAM168B	0.000700116	-0.00134093	2.99291	0.00292544	0.868139	-5.59913
ENSG00000275791	TRBV10-3	-0.00217149	-0.00805986	-2.9902	0.00295103	0.868139	-5.60711
ENSG00000228649	AC005682.5	-0.00145716	-0.0130847	-2.98699	0.00298153	0.868139	-5.61652
ENSG00000144659	SLC25A38	-0.00105347	-0.00123812	-2.98621	0.00298892	0.868139	-5.61879
ENSG00000181788	SIAH2	-0.00220918	-0.0169575	-2.98096	0.00303963	0.868139	-5.63419
ENSG00000002016	RAD52	-0.00112219	-0.00237967	-2.97694	0.0030789	0.868139	-5.64594
ENSG00000092200	RPGRIP1	0.00145012	-0.0139244	2.96967	0.00315109	0.868139	-5.66714
ENSG00000146409	SLC18B1	-0.00115487	-0.00497787	-2.96472	0.0032012	0.868139	-5.68157
ENSG00000255801	RP11-561P12.5	0.00245962	-0.0386937	2.9486	0.00336941	0.870616	-5.72839
ENSG00000115602	IL1RL1	0.00231212	-0.0323053	2.94333	0.00342603	0.870616	-5.74362
ENSG00000163933	RFT1	-0.000821954	-0.00192134	-2.94106	0.00345082	0.870616	-5.7502
ENSG00000051620	HEBP2	0.000865143	-0.00470672	2.93807	0.00348356	0.870616	-5.75882
ENSG00000183889	AC138969.4	-0.00212548	-0.0113641	-2.93099	0.00356225	0.870978	-5.77922
ENSG00000196562	SULF2	0.00112063	-0.00746626	2.92574	0.00362167	0.870978	-5.79432
ENSG00000247271	ZBED5-AS1	-0.001106	0.00295431	-2.88882	0.00406584	0.943555	-5.8998
ENSG00000182512	GLRX5	-0.0022952	-0.0186121	-2.88751	0.00408255	0.943555	-5.90354
ENSG00000109667	SLC2A9	0.00122049	-0.0069658	2.87347	0.00426479	0.943555	-5.9433
ENSG00000285533		-0.00121139	0.0094484	-2.8648	0.00438092	0.943555	-5.96774
ENSG00000167768	KRT1	-0.00270482	-0.0373781	-2.86447	0.00438537	0.943555	-5.96866
ENSG00000143727	ACP1	-0.00115473	-0.00299909	-2.86264	0.0044103	0.943555	-5.97382
ENSG00000115590	IL1R2	0.00159032	-0.0117448	2.85715	0.00448587	0.943555	-5.98927
ENSG00000153253	SCN3A	-0.00202372	-0.0345182	-2.85209	0.00455651	0.943555	-6.00348
ENSG00000286482		-0.00117744	-0.00611737	-2.84974	0.00458971	0.943555	-6.01007
ENSG00000198131	ZNF544	-0.000772145	-0.00430524	-2.83064	0.00486731	0.972385	-6.06342
ENSG00000141469	SLC14A1	-0.00192365	-0.0139251	-2.82604	0.00493642	0.972385	-6.07622
ENSG00000179914	ITLN1	-0.00311194	-0.0252717	-2.82456	0.00495881	0.972385	-6.08032
ENSG00000152439	ZNF773	-0.00100417	-0.00799534	-2.81151	0.00516067	0.989793	-6.11652
ENSG00000129595	EPB41L4A	-0.00168404	-0.0110463	-2.79912	0.00535899	0.989793	-6.15071
ENSG00000128891	C15orf57	-0.000847903	-0.00235385	-2.7913	0.00548775	0.989793	-6.17222
ENSG00000221923	ZNF880	-0.00123134	-0.0127461	-2.79059	0.00549961	0.989793	-6.17417
ENSG00000120868	APAF1	0.00103646	-0.00641013	2.78311	0.00562568	0.989793	-6.1947
ENSG00000102760	RGCC	-0.00138756	-0.00621977	-2.77817	0.00571029	0.989793	-6.20821
ENSG00000129472	RAB2B	-0.00192519	-0.0121504	-2.77637	0.0057414	0.989793	-6.21313
ENSG00000168785	TSPAN5	-0.00201276	-0.0153903	-2.76855	0.00587848	0.989793	-6.23448
ENSG00000105810	CDK6	-0.00106442	-0.00785359	-2.76664	0.00591236	0.989793	-6.23967
ENSG00000258819	RP11-7F17.3	0.00173374	-0.0222759	2.76593	0.00592513	0.989793	-6.24162
ENSG00000265972	TXNIP	0.000936322	-0.00185635	2.76414	0.00595699	0.989793	-6.24647
ENSG00000047597	XK	-0.00244854	-0.0237199	-2.7527	0.00616532	0.989793	-6.27755
ENSG00000165060	FXN	-0.00100019	-0.00526069	-2.75054	0.00620536	0.989793	-6.2834
ENSG00000133742	CA1	-0.00278515	-0.0424893	-2.74791	0.00625459	0.989793	-6.29054
ENSG00000124813	RUNX2	0.00124371	-0.00694468	2.74689	0.00627372	0.989793	-6.2933
ENSG00000125810	CD93	0.00093461	-0.00875237	2.74475	0.00631393	0.989793	-6.29907
ENSG00000186529	CYP4F3	0.00125019	-0.0150145	2.74006	0.00640319	0.989793	-6.31174
ENSG00000167037	SGSM1	-0.00158804	0.00260063	-2.73786	0.00644538	0.989793	-6.31768
ENSG00000122025	FLT3	0.00191443	-0.00941811	2.73362	0.00652753	0.990476	-6.32911
ENSG00000100985	MMP9	0.00285274	-0.0421513	2.72662	0.00666517	0.992564	-6.34794
ENSG00000164674	SYTL3	0.000870892	-0.0038119	2.71481	0.00690313	0.992564	-6.37957
ENSG00000149548	CCDC15	-0.00144551	-0.0103805	-2.71189	0.00696326	0.992564	-6.38739
ENSG00000270550	IGHV3-30	-0.00278677	-0.0357714	-2.71123	0.00697685	0.992564	-6.38915
ENSG00000127946	HIP1	0.00152424	-0.020489	2.7111	0.00697954	0.992564	-6.3895
ENSG00000164576	SAP30L	0.000639631	-0.00167157	2.7097	0.00700853	0.992564	-6.39323
ENSG00000184182	UBE2F	-0.000922103	-0.000964267	-2.69566	0.00730546	0.997444	-6.43061
ENSG00000204613	TRIM10	-0.00215265	-0.0172148	-2.69011	0.00742591	0.997444	-6.44533
ENSG00000257167	TMPO-AS1	-0.00124014	-0.00830039	-2.6843	0.00755404	0.997444	-6.46073
ENSG00000205559	CHKB-AS1	-0.00124058	-0.00930676	-2.68406	0.00755944	0.997444	-6.46137
ENSG00000040199	PHLPP2	-0.00134537	-0.00412671	-2.68298	0.00758346	0.997444	-6.46423
ENSG00000172824	CES4A	-0.00149155	0.0160142	-2.6802	0.00764564	0.997444	-6.47157
ENSG00000058866	DGKG	0.0012831	-0.00826314	2.67823	0.00768988	0.997444	-6.47676
ENSG00000188175	HEPACAM2	-0.00271605	-0.016962	-2.67516	0.00775946	0.997444	-6.48486
ENSG00000135605	TEC	0.00118192	-0.00727599	2.67111	0.00785213	0.997444	-6.49554
ENSG00000123240	OPTN	-0.00141906	-0.0058222	-2.67058	0.00786431	0.997444	-6.49693
ENSG00000119950	MXI1	-0.00203943	-0.0166645	-2.66887	0.0079038	0.997444	-6.50143
ENSG00000277072	STAG3L2	-0.0012287	-0.00407497	-2.66108	0.00808581	0.999592	-6.52189
ENSG00000250616	RP11-455F5.3	0.00114817	-0.00994188	2.64976	0.00835718	0.999592	-6.55154
ENSG00000227678	RP11-73O6.3	-0.00175526	-0.0180645	-2.64633	0.0084411	0.999592	-6.56051
ENSG00000197608	ZNF841	-0.000869041	-0.00546956	-2.64556	0.00846001	0.999592	-6.56251
ENSG00000197134	ZNF257	-0.00163735	-0.026653	-2.64519	0.00846915	0.999592	-6.56348
ENSG00000229358	DPY19L1P1	-0.00223338	-0.0146486	-2.6424	0.00853807	0.999592	-6.57076
ENSG00000137073	UBAP2	-0.00134912	-0.00277585	-2.64116	0.0085688	0.999592	-6.57398
ENSG00000170191	NANP	-0.00130553	-0.00428896	-2.63981	0.00860241	0.999592	-6.57749
ENSG00000170515	PA2G4	-0.00102855	-0.00265953	-2.63555	0.00870922	0.999592	-6.58856
ENSG00000109906	ZBTB16	0.00171866	-0.0138943	2.62812	0.00889878	0.999592	-6.60787
ENSG00000126870	WDR60	-0.000970185	-0.00572456	-2.62661	0.00893763	0.999592	-6.61177
ENSG00000165568	AKR1E2	-0.00178014	-0.019869	-2.62628	0.00894599	0.999592	-6.61261
ENSG00000164754	RAD21	0.00110248	-0.00633477	2.61729	0.00918115	0.999592	-6.63586
ENSG00000271699	SNX29P2	-0.00204934	-0.0221201	-2.60869	0.00941127	0.999592	-6.65802
ENSG00000170180	GYPA	-0.00258365	-0.0254683	-2.60723	0.00945094	0.999592	-6.66179
ENSG00000141076	CIRH1A	-0.000875304	-0.00278306	-2.60488	0.00951509	0.999592	-6.66784
ENSG00000248905	FMN1	0.00189679	-0.0538439	2.59563	0.00977073	0.999592	-6.69156
ENSG00000284602		-0.00124347	-0.00460385	-2.5953	0.00977986	0.999592	-6.6924
ENSG00000120833	SOCS2	-0.00102496	-0.00659037	-2.59514	0.00978445	0.999592	-6.69282
ENSG00000204514	ZNF814	-0.000882754	-0.00727903	-2.59367	0.00982567	0.999592	-6.69658
ENSG00000197965	MPZL1	0.0010857	-0.0099991	2.58785	0.00999047	0.999592	-6.71145
ENSG00000066926	FECH	-0.00223176	-0.0226114	-2.58489	0.0100752	0.999592	-6.719
ENSG00000025293	PHF20	0.0006579	-0.00217793	2.58137	0.0101772	0.999592	-6.72799
ENSG00000131781	FMO5	0.000999623	-0.00506052	2.57957	0.0102293	0.999592	-6.73256
ENSG00000172349	IL16	0.000550298	0.0003078	2.57757	0.010288	0.999592	-6.73767
ENSG00000165775	FUNDC2	-0.00104789	-0.00185028	-2.57156	0.0104653	0.999592	-6.75293
ENSG00000082146	STRADB	-0.00215185	-0.0180199	-2.56912	0.010538	0.999592	-6.75911
ENSG00000253982	CTD-2336O2.1	-0.00165327	-0.00978147	-2.56624	0.0106245	0.999592	-6.76641
ENSG00000086232	EIF2AK1	-0.00168798	-0.0100979	-2.56615	0.0106273	0.999592	-6.76664
ENSG00000269609	RPARP-AS1	-0.00079332	-0.0012911	-2.56274	0.0107306	0.999592	-6.77527
ENSG00000099251	HSD17B7P2	-0.00149171	-0.017978	-2.55336	0.0110194	0.999592	-6.79896
ENSG00000124098	FAM210B	-0.00211914	-0.0190374	-2.55315	0.0110259	0.999592	-6.79949
ENSG00000171466	ZNF562	-0.00085625	-0.00480713	-2.54631	0.011241	0.999592	-6.81671
ENSG00000093134	VNN3	0.00111116	-0.0133297	2.54156	0.0113923	0.999592	-6.82862
ENSG00000122696	SLC25A51	-0.000808579	-0.00223449	-2.54149	0.0113946	0.999592	-6.8288
ENSG00000110693	SOX6	-0.00195817	-0.0104215	-2.53891	0.0114776	0.999592	-6.83527
ENSG00000214517	PPME1	-0.000905914	-0.00173601	-2.53725	0.0115315	0.999592	-6.83944
ENSG00000196345	ZKSCAN7	-0.000893707	-0.0113032	-2.53525	0.0115966	0.999592	-6.84445
ENSG00000141384	TAF4B	-0.00093411	-0.00545857	-2.52984	0.0117742	0.999592	-6.85798
ENSG00000153574	RPIA	-0.00157154	-0.00908904	-2.52939	0.0117888	0.999592	-6.85909
ENSG00000125459	MSTO1	-0.000896801	0.000984312	-2.52851	0.0118182	0.999592	-6.8613
ENSG00000260592	CTA-363E6.6	-0.00206784	-0.0120687	-2.52465	0.0119466	0.999592	-6.87092
ENSG00000103196	CRISPLD2	0.00129967	-0.0150731	2.5178	0.012178	0.999592	-6.88798
ENSG00000198876	DCAF12	-0.0020934	-0.0190226	-2.51382	0.0123143	0.999592	-6.89788
ENSG00000272037	KB-431C1.5	0.00175687	-0.0267673	2.51367	0.0123194	0.999592	-6.89824
ENSG00000120217	CD274	-0.00159461	-0.0148895	-2.51328	0.0123326	0.999592	-6.8992
ENSG00000026751	SLAMF7	-0.000997692	-0.00947468	-2.51053	0.0124277	0.999592	-6.90603
ENSG00000147535	PPAPDC1B	-0.000833601	-0.00607128	-2.50859	0.0124953	0.999592	-6.91085
ENSG00000147684	NDUFB9	-0.000575273	-0.0013534	-2.50829	0.0125057	0.999592	-6.91159
ENSG00000177575	CD163	0.0014338	-0.0106067	2.49789	0.0128727	0.999592	-6.93728
ENSG00000187621	TCL6	-0.00170646	-0.0300915	-2.49662	0.0129185	0.999592	-6.94043
ENSG00000162722	TRIM58	-0.00229211	-0.0255807	-2.49658	0.0129197	0.999592	-6.94051
ENSG00000185950	IRS2	0.0011664	-0.00576241	2.49224	0.0130764	0.999592	-6.95121
ENSG00000108515	ENO3	-0.00167288	-0.000847376	-2.49199	0.0130856	0.999592	-6.95184
ENSG00000214293	APTR	0.000988808	-0.00945804	2.48782	0.0132374	0.999592	-6.96208
ENSG00000145287	PLAC8	-0.000708001	-0.0038011	-2.48453	0.0133586	0.999592	-6.97016
ENSG00000198805	PNP	-0.00102882	-0.00245164	-2.48337	0.0134018	0.999592	-6.97302
ENSG00000182183	FAM159A	-0.00124172	-0.00254369	-2.48034	0.0135145	0.999592	-6.98045
ENSG00000256751	PLBD1-AS1	0.00103758	-0.0122905	2.47607	0.0136746	0.999592	-6.99089
ENSG00000114126	TFDP2	-0.000856558	-0.00343636	-2.47033	0.0138928	0.999592	-7.00492
ENSG00000136999	NOV	0.00149229	-0.0177244	2.46996	0.0139071	0.999592	-7.00583
ENSG00000057935	MTA3	-0.000876419	-0.00662835	-2.4642	0.0141291	0.999592	-7.01986
ENSG00000175691	ZNF77	-0.00110241	-0.00858358	-2.46331	0.0141637	0.999592	-7.02203
ENSG00000155962	CLIC2	-0.00179767	-0.0148393	-2.46075	0.014264	0.999592	-7.02827
ENSG00000072274	TFRC	-0.00120868	-0.00492738	-2.45967	0.0143061	0.999592	-7.03089
ENSG00000279425	CTD-2017D11.2	-0.00178808	-0.00458619	-2.45911	0.0143282	0.999592	-7.03225
ENSG00000161654	LSM12	-0.000830968	-0.00384947	-2.45884	0.0143388	0.999592	-7.03291
ENSG00000197497	ZNF665	-0.001381	-0.0138043	-2.45882	0.0143398	0.999592	-7.03297
ENSG00000204161	C10orf128	0.000909599	-0.0094116	2.45581	0.0144586	0.999592	-7.04027
ENSG00000197721	CR1L	-0.00198833	-0.0121362	-2.45434	0.0145168	0.999592	-7.04382
ENSG00000099968	BCL2L13	-0.000924391	-0.00171607	-2.45204	0.0146088	0.999592	-7.04941
ENSG00000135679	MDM2	0.000932926	-0.00540216	2.45105	0.0146486	0.999592	-7.05182
ENSG00000065978	YBX1	-0.00144442	-0.00539228	-2.44711	0.0148074	0.999592	-7.06135
ENSG00000152990	GPR125	-0.00145989	-0.0247615	-2.44588	0.014857	0.999592	-7.06432
ENSG00000004468	CD38	-0.00129622	-0.00967565	-2.44198	0.0150163	0.999592	-7.07374
ENSG00000287255		0.00174037	-0.0202293	2.43894	0.0151412	0.999592	-7.08107
ENSG00000135823	STX6	0.00062586	-0.00221614	2.43871	0.0151509	0.999592	-7.08163
ENSG00000144468	RHBDD1	-0.00116777	-0.00319271	-2.43684	0.0152282	0.999592	-7.08613
ENSG00000225224	RP4-814D15.2	-0.00165433	-0.00364348	-2.43531	0.0152918	0.999592	-7.08981
ENSG00000004939	SLC4A1	-0.00240464	-0.0284271	-2.43226	0.0154193	0.999592	-7.09715
ENSG00000180509	KCNE1	0.00140189	-0.00820615	2.43129	0.0154604	0.999592	-7.0995
ENSG00000096060	FKBP5	0.0014772	-0.010556	2.42703	0.0156402	0.999592	-7.10971
ENSG00000120942	UBIAD1	-0.000741694	-0.000710887	-2.42675	0.0156522	0.999592	-7.11039
ENSG00000196502	SULT1A1	0.00113708	-0.0126763	2.42654	0.0156612	0.999592	-7.11089
ENSG00000197943	PLCG2	0.000613947	-0.00156726	2.42625	0.0156733	0.999592	-7.11157
ENSG00000256525	POLG2	-0.000833686	-0.00414099	-2.42494	0.0157294	0.999592	-7.11473
ENSG00000230615	RP5-1198O20.4	-0.00212914	-0.0116548	-2.4237	0.0157823	0.999592	-7.11769
ENSG00000184307	ZDHHC23	-0.000919585	-0.00702583	-2.42001	0.0159411	0.999592	-7.12653
ENSG00000125375	ATP5S	-0.000944321	-0.00356738	-2.4194	0.0159674	0.999592	-7.12798
ENSG00000113048	MRPS27	-0.000611988	-0.00295897	-2.41902	0.0159842	0.999592	-7.12891
ENSG00000151882	CCL28	-0.000998086	-0.00772372	-2.41626	0.0161039	0.999592	-7.13549
ENSG00000185104	FAF1	-0.000554948	-0.00254231	-2.41477	0.0161693	0.999592	-7.13907
ENSG00000148175	STOM	-0.00122694	-0.00563742	-2.41259	0.0162646	0.999592	-7.14425
ENSG00000168646	AXIN2	-0.00105871	-0.0119329	-2.41205	0.0162886	0.999592	-7.14555
ENSG00000108244	KRT23	0.0011057	-0.0119183	2.41051	0.0163565	0.999592	-7.14922
ENSG00000123836	PFKFB2	0.00115025	-0.00559862	2.40964	0.0163949	0.999592	-7.15129
ENSG00000184702	SEPT5	0.00329677	-0.0513386	2.40704	0.0165106	0.999592	-7.15748
ENSG00000111962	UST	-0.00102924	-0.000658447	-2.40543	0.0165826	0.999592	-7.16132
ENSG00000171453	POLR1C	-0.00073615	-0.002069	-2.40391	0.0166507	0.999592	-7.16493
ENSG00000039068	CDH1	-0.00194852	-0.00928753	-2.40385	0.0166536	0.999592	-7.16508
ENSG00000001084	GCLC	-0.00116184	-0.00593283	-2.40355	0.0166669	0.999592	-7.16579
ENSG00000196411	EPHB4	0.00161888	-0.00982883	2.40243	0.0167174	0.999592	-7.16845
ENSG00000161551	ZNF577	-0.000831403	-0.00641817	-2.40132	0.0167675	0.999592	-7.17109
ENSG00000184903	IMMP2L	-0.00103566	-0.0102715	-2.39923	0.0168622	0.999592	-7.17605
ENSG00000140044	JDP2	0.00107208	-0.00409209	2.39813	0.0169118	0.999592	-7.17864
ENSG00000243176	RP11-550I24.2	-0.00107734	-0.00709365	-2.39767	0.0169329	0.999592	-7.17974
ENSG00000197872	FAM49A	0.000823152	-0.00483477	2.397	0.0169634	0.999592	-7.18132
ENSG00000011198	ABHD5	0.00108838	-0.0099501	2.39664	0.0169798	0.999592	-7.18217
ENSG00000178075	GRAMD1C	0.00145413	-0.0167376	2.3955	0.0170323	0.999592	-7.18489
ENSG00000204010	IFIT1B	-0.00232926	-0.0321285	-2.3936	0.0171195	0.999592	-7.18939
ENSG00000165209	STRBP	-0.000882605	-0.00970156	-2.3919	0.0171978	0.999592	-7.1934
ENSG00000131844	MCCC2	-0.00078905	-0.00587155	-2.38972	0.0172989	0.999592	-7.19856
ENSG00000171970	ZNF57	-0.00122726	-0.00164734	-2.38944	0.0173119	0.999592	-7.19922
ENSG00000247092	SNHG10	-0.00091108	-0.00404472	-2.38649	0.0174495	0.999592	-7.20619
ENSG00000143416	SELENBP1	-0.00237059	-0.0275182	-2.38375	0.017578	0.999592	-7.21264
ENSG00000117090	SLAMF1	-0.000774339	-0.00628023	-2.38182	0.0176693	0.999592	-7.21721
ENSG00000275835	TUBGCP5	-0.000788967	-0.00719855	-2.37773	0.0178639	0.999592	-7.22684
ENSG00000117242	PINK1-AS	-0.000923007	0.00587822	-2.37535	0.0179776	0.999592	-7.23242
ENSG00000212978	AC016747.3	-0.00106439	-0.00601791	-2.37473	0.0180076	0.999592	-7.23388
ENSG00000237484	AP000476.1	-0.00132294	-0.0115506	-2.37204	0.0181373	0.999592	-7.24018
ENSG00000143486	EIF2D	-0.000554675	-0.000114963	-2.37105	0.0181855	0.999592	-7.24252
ENSG00000143502	SUSD4	-0.00160007	-0.0242793	-2.36879	0.0182954	0.999592	-7.24781
ENSG00000149970	CNKSR2	-0.00112975	-0.0125684	-2.36751	0.0183582	0.999592	-7.25082
ENSG00000157514	TSC22D3	0.000950639	-0.0011678	2.3664	0.0184122	0.999592	-7.2534
ENSG00000183111	ARHGEF37	-0.00220301	-0.00942138	-2.36415	0.0185231	0.999592	-7.25868
ENSG00000125124	BBS2	-0.000845888	-0.00769485	-2.36255	0.018602	0.999592	-7.26241
ENSG00000145332	KLHL8	0.000986277	-0.00572539	2.3618	0.0186394	0.999592	-7.26418
ENSG00000197629	MPEG1	0.000854875	-0.00657322	2.36141	0.0186586	0.999592	-7.26508
ENSG00000260495	RP11-55K13.1	-0.0012173	-0.0116355	-2.35912	0.0187728	0.999592	-7.27044
ENSG00000133059	DSTYK	0.000524719	-0.00155011	2.35799	0.0188291	0.999592	-7.27306
ENSG00000120910	PPP3CC	-0.000682775	-0.00375689	-2.35775	0.0188414	0.999592	-7.27364
ENSG00000130921	C12orf65	-0.00063622	-0.00333998	-2.35767	0.0188455	0.999592	-7.27382
ENSG00000136908	DPM2	-0.0019403	-0.0131397	-2.35734	0.018862	0.999592	-7.27459
ENSG00000134061	CD180	-0.000977807	-0.0106196	-2.35255	0.0191033	0.999592	-7.28575
ENSG00000226660	TRBV2	-0.00156041	-0.0182557	-2.35193	0.0191345	0.999592	-7.28718
ENSG00000115604	IL18R1	0.00125315	-0.00830391	2.35177	0.0191426	0.999592	-7.28755
ENSG00000157734	SNX22	-0.00126849	-0.00977215	-2.34506	0.0194861	0.999592	-7.30315
ENSG00000230006	ANKRD36BP2	-0.00210353	-0.026469	-2.34487	0.0194957	0.999592	-7.30358
ENSG00000133460	SLC2A11	-0.000954396	0.0010594	-2.34372	0.0195551	0.999592	-7.30625
ENSG00000125633	CCDC93	0.000514576	-0.00161465	2.34299	0.019593	0.999592	-7.30794
ENSG00000125037	EMC3	-0.00129728	-0.00453256	-2.34075	0.0197096	0.999592	-7.31315
ENSG00000267855	NDUFA7	0.0023811	-0.0334193	2.33605	0.0199558	0.999592	-7.32402
ENSG00000140403	DNAJA4	-0.00131889	-0.0087875	-2.33452	0.0200362	0.999592	-7.32755
ENSG00000163393	SLC22A15	0.000867595	-0.00877729	2.33378	0.0200754	0.999592	-7.32926
ENSG00000070614	NDST1	0.00132942	-0.0119897	2.33123	0.0202107	0.999592	-7.33514
ENSG00000136938	ANP32B	-0.00149955	-0.0107388	-2.328	0.0203833	0.999592	-7.34258
ENSG00000131876	SNRPA1	-0.000867872	-0.00584619	-2.32681	0.0204475	0.999592	-7.34534
ENSG00000170464	DNAJC18	0.0010388	-0.0154995	2.32522	0.0205332	0.999592	-7.349
ENSG00000261804	RP11-44F14.2	0.00112476	-0.0120368	2.32254	0.0206785	0.999592	-7.35517
ENSG00000155265	GOLGA7B	-0.00100196	-0.00123593	-2.31852	0.0208976	0.999592	-7.36439
ENSG00000068383	INPP5A	0.000638242	-0.000899314	2.31782	0.020936	0.999592	-7.36599
ENSG00000149269	PAK1	0.000783054	-0.00360104	2.31719	0.0209705	0.999592	-7.36743
ENSG00000086848	ALG9	-0.000736878	-0.00524746	-2.31585	0.0210443	0.999592	-7.3705
ENSG00000213742	ZNF337-AS1	-0.00130806	-0.00867644	-2.31476	0.0211047	0.999592	-7.37301
ENSG00000148908	RGS10	-0.0012849	-0.00429214	-2.31217	0.0212482	0.999592	-7.37893
ENSG00000046647	GEMIN8	-0.00097136	-0.00375549	-2.31099	0.0213144	0.999592	-7.38165
ENSG00000121897	LIAS	-0.000847641	-0.00604164	-2.31044	0.0213448	0.999592	-7.3829
ENSG00000205531	NAP1L4	-0.000618899	-0.00050439	-2.30914	0.0214174	0.999592	-7.38587
ENSG00000213390	ARHGAP19	0.000716258	-0.00381671	2.30787	0.0214887	0.999592	-7.38877
ENSG00000146909	NOM1	-0.000630795	-0.00391284	-2.30759	0.0215047	0.999592	-7.38942
ENSG00000115998	C2orf42	-0.00062881	-0.00274674	-2.30474	0.0216652	0.999592	-7.39592
ENSG00000211801	TRAV21	-0.00146998	-0.0170181	-2.29957	0.0219596	0.999592	-7.4077
ENSG00000123473	STIL	-0.00185339	-0.0128864	-2.29501	0.0222223	0.999592	-7.41808
ENSG00000135070	ISCA1	-0.00143189	-0.010869	-2.29499	0.0222232	0.999592	-7.41812
ENSG00000186166	CCDC84	-0.000768579	-0.00451368	-2.28774	0.0226463	0.999592	-7.43457
ENSG00000090013	BLVRB	-0.00239809	-0.02279	-2.28716	0.0226804	0.999592	-7.43589
ENSG00000100596	SPTLC2	0.000802342	-0.00347942	2.28457	0.022833	0.999592	-7.44173
ENSG00000166523	CLEC4E	0.00116268	-0.0117835	2.28287	0.0229339	0.999592	-7.44558
ENSG00000221817	PPP3CB-AS1	-0.000817122	-0.00574279	-2.2822	0.0229739	0.999592	-7.4471
ENSG00000138311	ZNF365	-0.0013367	-0.0189926	-2.28193	0.02299	0.999592	-7.44771
ENSG00000163257	DCAF16	-0.000651169	-0.00415999	-2.28174	0.0230013	0.999592	-7.44814
ENSG00000274602	PI4KAP1	-0.00154934	-0.0259581	-2.28064	0.0230669	0.999592	-7.45062
ENSG00000248275	TRIM52-AS1	-0.00104989	0.00710924	-2.28035	0.0230844	0.999592	-7.45128
ENSG00000189060	H1F0	-0.00162029	-0.0164053	-2.27987	0.023113	0.999592	-7.45236
ENSG00000198959	TGM2	-0.00219835	-0.0208551	-2.27896	0.0231674	0.999592	-7.45441
ENSG00000125304	TM9SF2	0.000964975	-0.00559144	2.27875	0.0231803	0.999592	-7.45489
ENSG00000196227	FAM217B	0.000806492	-0.00454549	2.27736	0.0232639	0.999592	-7.45803
ENSG00000137274	BPHL	-0.00105126	-0.0153433	-2.27563	0.0233683	0.999592	-7.46193
ENSG00000178585	CTNNBIP1	0.000993647	0.00344504	2.27311	0.0235213	0.999592	-7.46761
ENSG00000012983	MAP4K5	-0.000946959	-0.00498829	-2.27262	0.0235506	0.999592	-7.4687
ENSG00000240849	TMEM189	-0.00084609	-0.00183269	-2.27163	0.0236113	0.999592	-7.47094
ENSG00000132155	RAF1	0.000506034	-0.00150498	2.27063	0.0236725	0.999592	-7.47319
ENSG00000106537	TSPAN13	-0.00120871	-0.0065131	-2.27002	0.0237096	0.999592	-7.47456
ENSG00000132965	ALOX5AP	0.0010186	-0.00718308	2.26808	0.0238285	0.999592	-7.47891
ENSG00000129158	SERGEF	-0.00058615	-0.00082163	-2.26329	0.0241247	0.999592	-7.48966
ENSG00000241106	HLA-DOB	-0.0010781	-0.0147396	-2.26257	0.0241692	0.999592	-7.49127
ENSG00000115525	ST3GAL5	-0.000767382	-0.00570794	-2.26035	0.0243078	0.999592	-7.49624
ENSG00000225783	MIAT	-0.000844511	-0.0100942	-2.25932	0.0243724	0.999592	-7.49855
ENSG00000218809	RP1-229K20.5	0.00132997	-0.0166762	2.25481	0.0246564	0.999592	-7.50862
ENSG00000179715	PCED1B	-0.00109263	-0.00702808	-2.25177	0.02485	0.999592	-7.51542
ENSG00000230438	SERPINB9P1	-0.000986509	-0.00921018	-2.24903	0.0250254	0.999592	-7.52153
ENSG00000143862	ARL8A	0.000994648	4.88731e-06	2.24624	0.025205	0.999592	-7.52774
ENSG00000137267	TUBB2A	-0.00292256	-0.101597	-2.24372	0.0253677	0.999592	-7.53334
ENSG00000169964	TMEM42	-0.000751309	-0.00205194	-2.24311	0.0254075	0.999592	-7.5347
ENSG00000270640	RP11-373D23.2	0.00184477	-0.0457462	2.23575	0.0258896	0.999592	-7.55101
ENSG00000232021	LEF1-AS1	-0.00140166	-0.0262552	-2.23478	0.0259544	0.999592	-7.55318
ENSG00000152078	TMEM56	-0.00212901	-0.0195904	-2.23434	0.0259833	0.999592	-7.55415
ENSG00000104765	BNIP3L	-0.00176135	-0.0147909	-2.23426	0.0259882	0.999592	-7.55431
ENSG00000137198	GMPR	-0.00200961	-0.0205109	-2.23393	0.0260101	0.999592	-7.55504
ENSG00000188315	C3orf62	0.000669139	-0.004474	2.23365	0.0260288	0.999592	-7.55566
ENSG00000131981	LGALS3	-0.0013108	-0.00895568	-2.23137	0.0261807	0.999592	-7.56071
ENSG00000197993	KEL	-0.00205364	-0.0161137	-2.23109	0.0261995	0.999592	-7.56134
ENSG00000214736	TOMM6	-0.00100079	-0.0034291	-2.22902	0.0263376	0.999592	-7.56589
ENSG00000181826	RELL1	0.000872653	-0.00539497	2.22759	0.0264341	0.999592	-7.56907
ENSG00000131480	AOC2	0.00162714	-0.0137662	2.22384	0.026687	0.999592	-7.57732
ENSG00000165115	KIF27	0.00104992	-0.0112953	2.22228	0.0267936	0.999592	-7.58077
ENSG00000148606	POLR3A	-0.000644764	-0.00320383	-2.22005	0.0269454	0.999592	-7.58567
ENSG00000184305	CCSER1	-0.00103563	-0.0121175	-2.21964	0.0269736	0.999592	-7.58658
ENSG00000179240	RP11-111M22.2	-0.000898879	-0.00656956	-2.21953	0.026981	0.999592	-7.58681
ENSG00000236255	AC009404.2	-0.00114585	-0.0115095	-2.21905	0.0270143	0.999592	-7.58788
ENSG00000125257	ABCC4	-0.00126192	-0.00723997	-2.21878	0.0270323	0.999592	-7.58846
ENSG00000171960	PPIH	-0.000661732	-0.00492473	-2.21849	0.0270524	0.999592	-7.5891
ENSG00000120158	RCL1	-0.000951818	-0.00492146	-2.21844	0.0270559	0.999592	-7.58922
ENSG00000261208	RP11-452D12.1	-0.00161278	-0.0222224	-2.21721	0.0271405	0.999592	-7.59192
ENSG00000172331	BPGM	-0.00190053	-0.0241955	-2.21523	0.027277	0.999592	-7.59626
ENSG00000173614	NMNAT1	0.00068967	-0.00601646	2.21505	0.0272893	0.999592	-7.59666
ENSG00000082512	TRAF5	-0.00069309	-0.00680806	-2.21372	0.0273818	0.999592	-7.59958
ENSG00000197312	DDI2	-0.000735534	-0.00329931	-2.21266	0.0274549	0.999592	-7.60189
ENSG00000286796		0.00133902	0.00118875	2.21078	0.0275861	0.999592	-7.60602
ENSG00000173926	MARCH3	-0.00116465	-0.00190161	-2.21033	0.0276175	0.999592	-7.607
ENSG00000101158	NELFCD	-0.00051672	-0.00216123	-2.20914	0.027701	0.999592	-7.60962
ENSG00000239998	LILRA2	0.000951204	-0.0067372	2.20871	0.0277309	0.999592	-7.61055
ENSG00000198429	ZNF69	-0.000956376	-0.0157477	-2.20842	0.0277513	0.999592	-7.61119
ENSG00000166228	PCBD1	0.00105539	0.00333584	2.2079	0.0277878	0.999592	-7.61232
ENSG00000006530	AGK	-0.000627457	-0.00483522	-2.20725	0.0278337	0.999592	-7.61375
ENSG00000205045	SLFN12L	-0.000903029	-0.00923738	-2.20539	0.0279645	0.999592	-7.61781
ENSG00000119326	CTNNAL1	-0.00183832	-0.0177322	-2.20478	0.0280081	0.999592	-7.61916
ENSG00000267787	RP11-35G9.5	-0.000940665	-0.00641907	-2.20469	0.0280145	0.999592	-7.61935
ENSG00000143185	XCL2	-0.00181111	-0.00256805	-2.20404	0.02806	0.999592	-7.62076
ENSG00000169826	CSGALNACT2	0.000861557	-0.00513398	2.19784	0.0285023	0.999592	-7.63428
ENSG00000197535	MYO5A	0.00068502	-0.00389695	2.19753	0.0285252	0.999592	-7.63497
ENSG00000224616	RTCA-AS1	-0.00111879	-0.00777261	-2.19734	0.0285386	0.999592	-7.63538
ENSG00000105993	DNAJB6	0.000536662	-0.00258729	2.1954	0.0286784	0.999592	-7.6396
ENSG00000152484	USP12	-0.00145562	-0.0137618	-2.19517	0.0286946	0.999592	-7.64009
ENSG00000212907	MT-ND4L	-0.00206535	-0.0203052	-2.1947	0.0287286	0.999592	-7.64112
ENSG00000145741	BTF3	-0.000962798	-0.00327113	-2.19367	0.0288033	0.999592	-7.64336
ENSG00000139354	GAS2L3	-0.00167684	-0.00601148	-2.19346	0.0288189	0.999592	-7.64383
ENSG00000167555	ZNF528	-0.000750923	-0.00654088	-2.18935	0.0291176	0.999592	-7.65274
ENSG00000139629	GALNT6	-0.000840465	-0.00138779	-2.18879	0.0291593	0.999592	-7.65397
ENSG00000005882	PDK2	-0.00147795	-0.00529361	-2.18852	0.0291789	0.999592	-7.65455
ENSG00000005020	SKAP2	0.00104679	-0.0105836	2.18761	0.0292453	0.999592	-7.65651
ENSG00000112294	ALDH5A1	-0.00128912	-0.01032	-2.18704	0.0292876	0.999592	-7.65776
ENSG00000102100	SLC35A2	0.000901892	0.00551346	2.18698	0.0292915	0.999592	-7.65788
ENSG00000134779	TPGS2	-0.000876913	-0.00231756	-2.18502	0.0294361	0.999592	-7.66213
ENSG00000242294	STAG3L5P	-0.000842747	-0.00548488	-2.18118	0.0297209	0.999592	-7.67044
ENSG00000104695	PPP2CB	0.000821821	-0.0046708	2.18059	0.0297646	0.999592	-7.67171
ENSG00000160908	ZNF394	-0.000467231	0.000995482	-2.17999	0.0298099	0.999592	-7.67302
ENSG00000156869	FRRS1	0.00115928	-0.0143101	2.17911	0.0298757	0.999592	-7.67492
ENSG00000135074	ADAM19	0.000931295	-0.00575034	2.17727	0.0300137	0.999592	-7.6789
ENSG00000117640	MTFR1L	-0.000484203	-0.000288664	-2.17679	0.0300497	0.999592	-7.67993
ENSG00000147454	SLC25A37	-0.00134109	-0.0073214	-2.17517	0.0301712	0.999592	-7.68341
ENSG00000164398	ACSL6	-0.000987784	-0.00756432	-2.17421	0.030244	0.999592	-7.68549
ENSG00000131355	EMR3	0.000852285	-0.00845961	2.17278	0.030352	0.999592	-7.68856
ENSG00000168405	CMAHP	-0.00080518	-0.00492572	-2.17269	0.0303591	0.999592	-7.68876
ENSG00000135250	SRPK2	0.00076477	-0.00476313	2.17167	0.0304363	0.999592	-7.69096
ENSG00000053524	MCF2L2	-0.00121818	-0.0148908	-2.17105	0.0304833	0.999592	-7.69228
ENSG00000117009	KMO	-0.00108406	-0.0116495	-2.1696	0.0305939	0.999592	-7.69541
ENSG00000179456	ZBTB18	0.000513834	-0.00122775	2.16822	0.0306994	0.999592	-7.69837
ENSG00000279738	RP5-1014D13.2	-0.0009002	-0.00296263	-2.16621	0.0308538	0.999592	-7.7027
ENSG00000093000	NUP50	0.000614382	-0.00313018	2.16488	0.0309561	0.999592	-7.70555
ENSG00000101052	IFT52	-0.000913949	-0.00317035	-2.16418	0.0310103	0.999592	-7.70705
ENSG00000057704	TMCC3	0.000806274	-0.00813451	2.16376	0.0310425	0.999592	-7.70795
ENSG00000228794	LINC01128	-0.000601709	-0.00136753	-2.15731	0.031545	0.999592	-7.72178
ENSG00000183688	FAM101B	0.000940118	-0.00778938	2.15707	0.0315635	0.999592	-7.72228
ENSG00000168264	IRF2BP2	0.000460727	-0.000382915	2.15533	0.0317003	0.999592	-7.726
ENSG00000169902	TPST1	0.00148516	-0.0213591	2.155	0.0317267	0.999592	-7.72672
ENSG00000186063	AIDA	-0.00103295	-0.00543932	-2.15069	0.0320672	0.999592	-7.7359
ENSG00000148187	MRRF	-0.000725756	-0.00669793	-2.14899	0.0322028	0.999592	-7.73953
ENSG00000253981	ALG1L13P	0.00114207	-0.0106537	2.14847	0.0322443	0.999592	-7.74064
ENSG00000241878	PISD	0.000894847	-0.0060212	2.14817	0.0322684	0.999592	-7.74128
ENSG00000189144	ZNF573	-0.0010232	-0.0112539	-2.14583	0.0324558	0.999592	-7.74626
ENSG00000186818	LILRB4	0.00111141	-0.000802838	2.14395	0.0326071	0.999592	-7.75026
ENSG00000116771	AGMAT	-0.000935931	0.000360443	-2.14369	0.032628	0.999592	-7.75081
ENSG00000166947	EPB42	-0.00198302	-0.0245292	-2.14295	0.0326877	0.999592	-7.75238
ENSG00000242125	SNHG3	-0.000665712	-0.00247882	-2.14049	0.0328876	0.999592	-7.75762
ENSG00000105352	CEACAM4	0.000984051	-0.0111454	2.13961	0.0329586	0.999592	-7.75947
ENSG00000235683	AC018442.1	0.00153231	0.000396162	2.13915	0.0329962	0.999592	-7.76045
ENSG00000135052	GOLM1	0.000989269	-0.00770398	2.13747	0.0331338	0.999592	-7.76402
ENSG00000172671	ZFAND4	-0.000843565	-0.00373111	-2.13652	0.033211	0.999592	-7.76602
ENSG00000112335	SNX3	-0.00128661	-0.0071742	-2.1363	0.0332296	0.999592	-7.7665
ENSG00000008405	CRY1	-0.000655886	-0.00416324	-2.13606	0.033249	0.999592	-7.76701
ENSG00000147416	ATP6V1B2	0.000712207	-0.0039772	2.13462	0.0333672	0.999592	-7.77005
ENSG00000183943	PRKX	-0.000490045	-0.00464137	-2.13353	0.0334568	0.999592	-7.77236
ENSG00000197061	HIST1H4C	-0.00137477	-0.00767252	-2.13176	0.033603	0.999592	-7.7761
ENSG00000263465	SRSF8	-0.000645701	-0.00146017	-2.13145	0.033629	0.999592	-7.77676
ENSG00000116260	QSOX1	0.00112815	-0.00434642	2.12904	0.0338285	0.999592	-7.78184
ENSG00000005100	DHX33	-0.000698271	-0.00334075	-2.12854	0.0338707	0.999592	-7.78291
ENSG00000159733	ZFYVE28	-0.00129431	-0.000765239	-2.12846	0.0338775	0.999592	-7.78308
ENSG00000254614	AP003068.23	-0.00123567	-0.00245775	-2.12753	0.0339546	0.999592	-7.78503
ENSG00000255717	SNHG1	-0.000791826	-0.00581483	-2.12734	0.0339707	0.999592	-7.78544
ENSG00000268555	RP11-678G14.3	-0.00180816	-0.0327114	-2.12734	0.033971	0.999592	-7.78545
ENSG00000135362	PRR5L	-0.000733574	-0.00573549	-2.12463	0.0341979	0.999592	-7.79116
ENSG00000109586	GALNT7	0.000873084	-0.00565875	2.12358	0.0342861	0.999592	-7.79336
ENSG00000103047	TANGO6	-0.000492087	-0.00292032	-2.12275	0.034356	0.999592	-7.79511
ENSG00000106610	STAG3L4	-0.000845061	-0.00418422	-2.12089	0.0345134	0.999592	-7.79903
ENSG00000135426	TESPA1	-0.000772198	-0.00797824	-2.12013	0.0345773	0.999592	-7.80062
ENSG00000166965	RCCD1	-0.0012733	0.0184683	-2.11901	0.0346729	0.999592	-7.80298
ENSG00000225101	OR52K3P	0.00101899	-0.0101768	2.11807	0.0347525	0.999592	-7.80495
ENSG00000233355	CHRM3-AS2	-0.00137729	-0.0094985	-2.11765	0.0347888	0.999592	-7.80584
ENSG00000100380	ST13	-0.00100255	-0.00437105	-2.11691	0.0348516	0.999592	-7.80739
ENSG00000065491	TBC1D22B	-0.00121773	-0.00615168	-2.11667	0.0348722	0.999592	-7.80789
ENSG00000240583	AQP1	-0.00216098	-0.0211399	-2.11369	0.0351274	0.999592	-7.81414
ENSG00000138744	NAAA	0.000565527	-0.00534538	2.11348	0.0351452	0.999592	-7.81458
ENSG00000113719	ERGIC1	0.000758846	-0.00209844	2.11334	0.0351576	0.999592	-7.81488
ENSG00000136273	HUS1	-0.000650658	-0.00349763	-2.11262	0.0352192	0.999592	-7.81638
ENSG00000243064	ABCC13	-0.00186477	-0.0210291	-2.11259	0.0352221	0.999592	-7.81645
ENSG00000130703	OSBPL2	0.000549355	-0.00115713	2.1119	0.0352814	0.999592	-7.81789
ENSG00000166669	ATF7IP2	-0.000855923	-0.00832186	-2.11158	0.0353092	0.999592	-7.81856
ENSG00000116120	FARSB	-0.000768784	-0.00616365	-2.10727	0.0356827	0.999592	-7.82757
ENSG00000134463	ECHDC3	0.00162857	-0.00997009	2.10709	0.0356986	0.999592	-7.82795
ENSG00000137193	PIM1	-0.0012877	-0.0072948	-2.10426	0.0359461	0.999592	-7.83387
ENSG00000057757	PITHD1	-0.00159573	-0.0180138	-2.10365	0.0359997	0.999592	-7.83514
ENSG00000170315	UBB	-0.00163649	-0.0176507	-2.1032	0.0360393	0.999592	-7.83608
ENSG00000230487	PSMG3-AS1	-0.00139393	0.0260468	-2.10295	0.0360615	0.999592	-7.83661
ENSG00000170919	TPT1-AS1	-0.00100487	-0.00741711	-2.10269	0.0360839	0.999592	-7.83714
ENSG00000250361	GYPB	-0.00170455	-0.0177973	-2.10096	0.0362365	0.999592	-7.84075
ENSG00000211794	TRAV12-3	-0.00124227	-0.00668833	-2.09732	0.0365593	0.999592	-7.84834
ENSG00000116138	DNAJC16	-0.000663629	-0.00412855	-2.09612	0.0366657	0.999592	-7.85082
ENSG00000142405	NLRP12	0.000958042	-0.00689706	2.09472	0.0367912	0.999592	-7.85374
ENSG00000104522	TSTA3	-0.00180657	-0.0151502	-2.09278	0.036965	0.999592	-7.85777
ENSG00000106346	USP42	-0.000779477	-0.00449309	-2.09249	0.0369914	0.999592	-7.85838
ENSG00000173812	EIF1	-0.000926293	-0.00375365	-2.09183	0.0370506	0.999592	-7.85975
ENSG00000162367	TAL1	-0.0015614	-0.0120608	-2.09079	0.0371445	0.999592	-7.86191
ENSG00000287979		-0.00112093	-0.00422873	-2.08779	0.0374151	0.999592	-7.86811
ENSG00000076770	MBNL3	-0.00179324	-0.0198457	-2.08644	0.0375383	0.999592	-7.87092
ENSG00000117036	ETV3	0.00049695	-0.00190083	2.08566	0.0376092	0.999592	-7.87253
ENSG00000160194	NDUFV3	-0.000465855	5.84822e-05	-2.08398	0.0377623	0.999592	-7.876
ENSG00000256269	HMBS	-0.00142702	-0.00555817	-2.08145	0.0379948	0.999592	-7.88124
ENSG00000164849	GPR146	-0.00202125	-0.022353	-2.08034	0.0380969	0.999592	-7.88353
ENSG00000223705	NSUN5P1	-0.000899914	-0.00598285	-2.07915	0.0382063	0.999592	-7.88597
ENSG00000116675	DNAJC6	-0.00176048	-0.013046	-2.07853	0.0382635	0.999592	-7.88725
ENSG00000112299	VNN1	0.00110047	-0.0180317	2.07732	0.0383762	0.999592	-7.88976
ENSG00000171105	INSR	0.000791452	-0.00303968	2.07699	0.0384063	0.999592	-7.89043
ENSG00000170271	FAXDC2	-0.00172196	-0.0212108	-2.07639	0.038462	0.999592	-7.89166
ENSG00000148158	SNX30	0.000543478	-0.00350195	2.07546	0.0385486	0.999592	-7.89358
ENSG00000246596	RP11-1277A3.2	-0.000895943	-0.00525037	-2.07474	0.0386157	0.999592	-7.89506
ENSG00000100387	RBX1	-0.0010377	-0.00569062	-2.07354	0.0387274	0.999592	-7.89753
ENSG00000100697	DICER1	0.000850832	-0.0059009	2.07331	0.0387489	0.999592	-7.898
ENSG00000179088	C12orf42	-0.00118996	-0.0151543	-2.07193	0.0388779	0.999592	-7.90083
ENSG00000184226	PCDH9	-0.00146908	-0.0360365	-2.07147	0.0389212	0.999592	-7.90178
ENSG00000198336	MYL4	-0.00201752	-0.0181596	-2.06939	0.0391175	0.999592	-7.90607
ENSG00000185379	RAD51D	-0.000617135	-0.0044118	-2.0689	0.0391635	0.999592	-7.90707
ENSG00000103037	SETD6	-0.000689553	-0.00536222	-2.0683	0.0392203	0.999592	-7.90831
ENSG00000075340	ADD2	-0.00105752	-0.00549417	-2.06771	0.0392756	0.999592	-7.90951
ENSG00000038219	BOD1L1	0.000719158	-0.00467866	2.06762	0.039284	0.999592	-7.90969
ENSG00000143457	GOLPH3L	-0.000763963	-0.00415687	-2.06633	0.0394068	0.999592	-7.91235
ENSG00000100558	PLEK2	-0.00174635	-0.0176509	-2.06589	0.0394477	0.999592	-7.91324
ENSG00000228340	MIR646HG	0.00131712	-0.0184958	2.06406	0.0396224	0.999592	-7.917
ENSG00000244731	C4A	-0.00284721	-0.0345368	-2.06289	0.0397338	0.999592	-7.91939
ENSG00000166130	IKBIP	0.00105623	-0.00886463	2.06273	0.0397489	0.999592	-7.91971
ENSG00000112406	HECA	0.00063451	-0.00252704	2.06238	0.0397822	0.999592	-7.92043
ENSG00000257335	MGAM	0.00117613	-0.0165158	2.06117	0.0398986	0.999592	-7.92292
ENSG00000072134	EPN2	0.00105072	-0.00182113	2.06004	0.040007	0.999592	-7.92523
ENSG00000183625	CCR3	0.00104953	-0.0181322	2.0544	0.0405521	0.999592	-7.93674
ENSG00000100099	HPS4	-0.000521911	-0.00236468	-2.05301	0.0406872	0.999592	-7.93957
ENSG00000165275	TRMT10B	-0.000842887	-0.00341017	-2.05265	0.0407225	0.999592	-7.94031
ENSG00000175536	LIPT2	-0.00135084	-0.00309508	-2.04884	0.0410956	0.999592	-7.94806
ENSG00000211695	TRGV9	-0.00148926	-0.0188708	-2.04829	0.0411496	0.999592	-7.94918
ENSG00000151611	MMAA	-0.00088201	-0.00774992	-2.04828	0.04115	0.999592	-7.94919
ENSG00000159131	GART	-0.00054433	-0.00301953	-2.04786	0.0411918	0.999592	-7.95005
ENSG00000130349	C6orf203	-0.000954437	-0.0175196	-2.04658	0.0413182	0.999592	-7.95266
ENSG00000151458	ANKRD50	0.000880132	-0.00848401	2.04642	0.0413332	0.999592	-7.95297
ENSG00000118007	STAG1	0.000770342	-0.00467525	2.04561	0.0414139	0.999592	-7.95462
ENSG00000095932	SMIM24	-0.00210717	-0.0316667	-2.04507	0.041467	0.999592	-7.95571
ENSG00000179833	SERTAD2	0.00114793	-0.00978248	2.0447	0.0415038	0.999592	-7.95647
ENSG00000143878	RHOB	0.00110596	-0.00538956	2.04464	0.0415096	0.999592	-7.95658
ENSG00000173110	HSPA6	0.00103781	-0.00840893	2.04214	0.0417587	0.999592	-7.96167
ENSG00000148950	IMMP1L	-0.00112836	-0.0110019	-2.04127	0.0418449	0.999592	-7.96342
ENSG00000234420	ZNF37BP	-0.00069251	-0.0051953	-2.04108	0.0418636	0.999592	-7.9638
ENSG00000103194	USP10	0.000657695	-0.00342563	2.03839	0.0421336	0.999592	-7.96926
ENSG00000188227	ZNF793	-0.00100079	-0.0114455	-2.03433	0.0425421	0.999592	-7.97745
ENSG00000106034	CPED1	0.000998431	-0.00850393	2.03324	0.0426533	0.999592	-7.97967
ENSG00000100490	CDKL1	-0.00100001	-0.00700139	-2.03275	0.0427026	0.999592	-7.98065
ENSG00000153066	TXNDC11	-0.000511322	-0.00185216	-2.03241	0.0427378	0.999592	-7.98134
ENSG00000150867	PIP4K2A	-0.00126091	-0.00870476	-2.03158	0.0428213	0.999592	-7.983
ENSG00000198712	MT-CO2	-0.00160091	-0.0156643	-2.03044	0.0429376	0.999592	-7.9853
ENSG00000090686	USP48	0.000703942	-0.00509328	2.02612	0.0433804	0.999592	-7.994
ENSG00000278259	MYO19	-0.000662503	-0.000771193	-2.02555	0.0434397	0.999592	-7.99516
ENSG00000197632	SERPINB2	0.00159363	-0.044684	2.02368	0.0436322	0.999592	-7.99891
ENSG00000065882	TBC1D1	0.00051878	-0.00110526	2.02175	0.0438322	0.999592	-8.00279
ENSG00000110042	DTX4	0.00100444	-0.00499713	2.02112	0.0438979	0.999592	-8.00405
ENSG00000215424	MCM3AP-AS1	-0.000788531	-0.00767239	-2.01936	0.0440805	0.999592	-8.00757
ENSG00000171051	FPR1	0.000920502	-0.0061945	2.01711	0.0443162	0.999592	-8.01209
ENSG00000128050	PAICS	-0.000743248	-0.00648236	-2.01616	0.0444157	0.999592	-8.01399
ENSG00000108423	TUBD1	-0.000862751	-0.00943681	-2.01611	0.0444206	0.999592	-8.01408
ENSG00000137842	TMEM62	-0.000645194	-0.00437748	-2.01564	0.04447	0.999592	-8.01502
ENSG00000133488	SEC14L4	-0.00205888	-0.0240858	-2.01496	0.0445416	0.999592	-8.01638
ENSG00000060138	YBX3	-0.00161322	-0.0165022	-2.01478	0.0445612	0.999592	-8.01676
ENSG00000131089	ARHGEF9	-0.000639616	-0.00467506	-2.01433	0.0446085	0.999592	-8.01765
ENSG00000225205	AC093818.1	-0.000920827	-0.0142319	-2.014	0.0446429	0.999592	-8.01831
ENSG00000115325	DOK1	0.00114949	-0.00283521	2.01386	0.0446576	0.999592	-8.01859
ENSG00000161638	ITGA5	0.000817854	-0.0032185	2.01159	0.0448978	0.999592	-8.02313
ENSG00000053501	USE1	-0.00103222	0.00475685	-2.00877	0.0451969	0.999592	-8.02874
ENSG00000120318	ARAP3	0.001371	-0.0120682	2.0087	0.0452054	0.999592	-8.0289
ENSG00000152582	SPEF2	-0.0010148	-0.0121162	-2.00695	0.0453921	0.999592	-8.03239
ENSG00000198342	ZNF442	-0.00148514	-0.00594511	-2.00666	0.045423	0.999592	-8.03297
ENSG00000100225	FBXO7	-0.00144433	-0.0123302	-2.00658	0.0454314	0.999592	-8.03312
ENSG00000100266	PACSIN2	0.000791186	-0.00281971	2.002	0.0459234	0.999592	-8.04223
ENSG00000286129		-0.000968921	-0.0142695	-2.0015	0.0459777	0.999592	-8.04323
ENSG00000177125	ZBTB34	0.000571765	-0.00260114	2.00144	0.0459839	0.999592	-8.04334
ENSG00000187796	CARD9	0.00194164	-0.0208394	2.00134	0.0459952	0.999592	-8.04355
ENSG00000188917	TRMT2B	-0.000492833	-0.00235883	-2.00114	0.0460171	0.999592	-8.04395
ENSG00000154640	BTG3	-0.00109452	-0.00410573	-2.00034	0.046103	0.999592	-8.04553
ENSG00000198909	MAP3K3	0.000794807	-0.00301666	1.99657	0.0465131	0.999592	-8.05301
ENSG00000197465	GYPE	-0.00171645	-0.024159	-1.99636	0.046536	0.999592	-8.05343
ENSG00000147526	TACC1	0.000672197	-0.0039195	1.99415	0.0467783	0.999592	-8.05781
ENSG00000140455	USP3	0.000681343	-0.0041392	1.99254	0.0469548	0.999592	-8.06099
ENSG00000076356	PLXNA2	0.00116775	-0.00764136	1.99102	0.0471221	0.999592	-8.064
ENSG00000100568	VTI1B	-0.000791369	-0.00245788	-1.98904	0.0473409	0.999592	-8.06791
ENSG00000114268	PFKFB4	0.00088461	-0.00567036	1.98614	0.0476642	0.999592	-8.07365
ENSG00000185630	PBX1	-0.00161664	-0.0179463	-1.98584	0.0476968	0.999592	-8.07423
ENSG00000169621	APLF	-0.00110251	-0.00885156	-1.98525	0.0477627	0.999592	-8.07539
ENSG00000168916	ZNF608	0.00136	-0.00233992	1.98515	0.0477742	0.999592	-8.07559
ENSG00000129197	RPAIN	-0.000625099	-0.00398756	-1.98489	0.0478037	0.999592	-8.07611
ENSG00000079308	TNS1	-0.00194801	-0.0275248	-1.98374	0.0479322	0.999592	-8.07838
ENSG00000161533	ACOX1	0.000684834	-0.00613969	1.98371	0.0479347	0.999592	-8.07842
ENSG00000131845	ZNF304	-0.000572161	-0.00333028	-1.98361	0.0479466	0.999592	-8.07863
ENSG00000145335	SNCA	-0.00166734	-0.0180491	-1.98233	0.0480904	0.999592	-8.08116
ENSG00000182481	KPNA2	-0.00106342	-0.00248778	-1.98088	0.0482527	0.999592	-8.084
ENSG00000163534	FCRL1	-0.00103195	-0.023136	-1.98037	0.0483104	0.999592	-8.085
ENSG00000125354	SEPT6	-0.000659695	-0.00589673	-1.97962	0.0483945	0.999592	-8.08647
ENSG00000070371	CLTCL1	0.000874731	-0.00605814	1.97956	0.048402	0.999592	-8.0866
ENSG00000136630	HLX	0.0010862	-0.00610098	1.97855	0.0485154	0.999592	-8.08857
ENSG00000176871	WSB2	-0.000617275	-0.00087293	-1.97553	0.0488584	0.999592	-8.09451
ENSG00000245849	RAD51-AS1	-0.00069514	-0.00478843	-1.97508	0.0489093	0.999592	-8.09539
ENSG00000008441	NFIX	-0.00188922	-0.0159004	-1.97393	0.049041	0.999592	-8.09765
ENSG00000211694	TRGV10	-0.00107379	-0.0180475	-1.96981	0.0495134	0.999592	-8.10572
ENSG00000135924	DNAJB2	-0.00138011	-0.00823131	-1.96925	0.0495777	0.999592	-8.10682
ENSG00000284773		-0.00156584	-0.0252195	-1.96919	0.0495843	0.999592	-8.10693
ENSG00000102445	KIAA0226L	0.000774504	-0.00782896	1.96772	0.0497543	0.999592	-8.10981
ENSG00000063854	HAGH	-0.00173994	-0.0151928	-1.96581	0.0499748	0.999592	-8.11353

## Sheet: ST6_Overlaps
ST6: Summary of Gene Overlaps and Unique Genes Identified Across Cross-Sectional, FEV1 Change, and Longitudinal Analyses in the COPDGene Study
Group	Unique_Genes
Longitudinal&FEV1_Change&Phase2	NOV, AC009404.2
Longitudinal&FEV1_Change	ALAS2, ABCG2, FAM104B, ZNF286B, SIAH2, KRT1, XK, UBE2F, MXI1, FECH, CTD-2336O2.1, FAM210B, DCAF12, STOM, UST, DNAJC18, H1F0, TAL1, MBNL3, CDKL1, PIP4K2A, SERPINB2, YBX3, PBX1
CS_Phase3&Longitudinal	STAG3L2, FMN1, SERGEF, LILRB4, RP11-678G14.3
Phase3&FEV1_Change	ENKUR, TOMM34, GPLD1, ZNF707
Phase2&FEV1_Change	GPR15, GPR55, WWC2, CD8B, TPK1, FAM213A, PTPN13, S100P
Phase2&Phase3	ZNF713, TOR1A, C14orf132, DPY30, SMAD1, PP7080, TMEM199, BCAT1, SCMH1, FH, MYLIP
CS_Phase2&Longitudinal	TMEM138, HAL, AHSP, FAM160A1, ANTXR2, SLC6A9, FAM168B, SLC14A1, ZNF773, FLT3, SAP30L, PA2G4, ZBTB16, PHF20, CRISPLD2, CD163, PNP, GPR125, SLC4A1, EPHB4, FAM49A, ABHD5, SELENBP1, CNKSR2, ARHGEF37, DSTYK, IL18R1, SLC22A15, NOM1, TMEM189, LEF1-AS1, LGALS3, TRAF5, PDK2, PPP2CB, ZBTB18, NUP50, TMCC3, AGMAT, EPB42, ZFYVE28, PIM1, ETV3, HMBS, SNX30, DICER1, MYL4, BOD1L1, IKBIP, ANKRD50, STAG1, ZNF793, Z…
Longitudinal	C14orf1, PTPRK, DAPK2, RP11-76E17.3, ABCC5, CYB5A, UROS, FKBP9, ZNF154, PCED1B-AS1, PADI4, POLR1D, ABCG1, CISD2, MARC1, RP11-498C9.15, RAD51C, NTAN1, CDK5R1, KCNH8, CACNB4, PIGU, RGS17P1, UNC119B, LINC00570, F11R, RNASE6, AGPAT9, ALS2CR12, TRBV10-3, AC005682.5, SLC25A38, RAD52, RPGRIP1, SLC18B1, RP11-561P12.5, IL1RL1, RFT1, HEBP2, AC138969.4, SULF2, ZBED5-AS1, GLRX5, SLC2A9, ACP1, IL1R2, SCN3A, Z…
FEV1_Change	RP11-996F15.2, KLHDC8B, BNC2, LRRC23, ERV3-1, LINC01011, BCAS4, PDGFC, AC007036.5, PPM1D, APOL1, RHOH, SLC25A14, RNF114, FNBP1L, ING2, LINC01270, RPA1, LRRN3, ZSWIM3, MRPS7, CD8A, AF131217.1, ICA1L, IGLV2-23, FAM20B, YOD1, CCDC86, IFNLR1, PEX19, TRAV8-6, TCP11L2, GID4, FCGR2B, ZRANB1, DSEL, MZB1, FZD5, UBE2H, PDCD2L, MFSD11, RMND5A, CCNY, GCNT1P3, HINT2, CORO2A, B3GNT5, ETV7, NUDT4, B4GALT6, HIPK…
CS_Phase2	AK5, TNF, FBXO21, CD55, NUGGC, CYP2U1, RP11-196G11.4, CISH, VPS35, JADE1, ITGA6, SOAT1, ADRB2, PRPF4, SNX9, AFG3L2, CREM, ALDH1A1, SLC4A10, GHRL, PIK3R1, ZNF551, ETS1, HIF1A, APLP2, CRAT, LIPN, H2AFV, RP11-291B21.2, ZFYVE9, HOOK1, IARS2, CRNKL1, ALDH6A1, GNS, NUP133, ALDH9A1, PATL2, SPG20, EXPH5, MEF2C, ZNF587B, LDLR, MYBL2, RNASEH1, JAK1, NFXL1, MSR1, RP11-110G21.1, COG2, PI3, C12orf75, SART3, G…
CS_Phase3	TCEAL3, ZNF584, HIST1H2BO, NUDT6, HLA-H, RP11-644F5.11, MIEF2, THAP3, OAS1, RRP1, RABL2A, PPAP2A, DRAP1, FLYWCH1, DDX55, HERPUD2, KCNN4, EMP3, LAMTOR2, RP11-206L10.8, ZSCAN32, OASL, ZNF132, PMF1, TAS2R64P, RABEPK, LAP3, TRIM5, SRGAP2C, SPATA20, ZNF530, VANGL1, ACOT9, GUCY1A3, PRMT5, MUT, MT2A, P2RY1, SPATS2L, PAM16, SLC22A16, TAF1B, BST2, USP18, PSME1, CCNJ, SHISA5, RP11-677M14.7, HIATL1, CEP89, …

## Sheet: ST7_Pathway_Analysis
ST7: Pathway Enrichment Analysis of Significant Genes Identified in the Longitudinal Analysis
source	term_name	term_id	adjusted_p_value	negative_log10_of_adjusted_p_value	term_size	query_size	intersection_size	effective_domain_size	intersections
GO:BP	organonitrogen compound metabolic process	GO:1901564	3.89696e-09	8.40927	5986	400	179	21031	PTPRK,HAL,AHSP,DAPK2,ABCC5,UROS,FKBP9,PADI4,ABCG1,NTAN1,CDK5R1,ALAS2,CACNB4,PIGU,ABCG2,SLC6A9,SLC25A38,SIAH2,RFT1,SULF2,GLRX5,SLC2A9,KRT1,ACP1,IL1R2,ITLN1,APAF1,RGCC,TSPAN5,CDK6,FXN,FLT3,MMP9,HIP1,UBE2F,TRIM10,TEC,NANP,PA2G4,ZBTB16,SOCS2,FECH,FMO5,STRADB,EIF2AK1,PPME1,RPIA,DCAF12,NDUFB9,TRIM58,ENO3,PNP,TFRC,BCL2L13,MDM2,YBX1,CD38,RHBDD1,SLC4A1,FKBP5,SULT1A1,PLCG2,ZDHHC23,MRPS27,FAF1,AXIN2,PFKFB2,…
GO:BP	hemoglobin metabolic process	GO:0020027	7.07012e-05	4.15057	19	400	7	21031	AHSP,ALAS2,SLC6A9,FECH,EIF2AK1,SLC25A37,EPB42
GO:BP	protein metabolic process	GO:0019538	0.000259607	3.58568	4912	400	139	21031	PTPRK,AHSP,DAPK2,FKBP9,PADI4,ABCG1,NTAN1,CDK5R1,ALAS2,PIGU,SLC6A9,SIAH2,RFT1,SULF2,GLRX5,KRT1,ACP1,IL1R2,ITLN1,APAF1,RGCC,TSPAN5,CDK6,FXN,FLT3,MMP9,HIP1,UBE2F,TRIM10,TEC,PA2G4,ZBTB16,SOCS2,FECH,STRADB,EIF2AK1,PPME1,DCAF12,TRIM58,TFRC,BCL2L13,MDM2,YBX1,RHBDD1,FKBP5,PLCG2,ZDHHC23,MRPS27,FAF1,AXIN2,UST,CDH1,GCLC,EPHB4,IMMP2L,ABHD5,EIF2D,KLHL8,DSTYK,PPP3CC,DPM2,NDUFA7,DNAJA4,NDST1,ANP32B,DNAJC18,PAK1…
GO:BP	tetrapyrrole metabolic process	GO:0033013	0.000671828	3.17274	64	400	10	21031	UROS,ALAS2,SLC6A9,SLC25A38,FXN,FECH,EIF2AK1,BLVRB,HMBS,MMAA
GO:BP	porphyrin-containing compound metabolic process	GO:0006778	0.00174723	2.75765	55	400	9	21031	UROS,ALAS2,SLC6A9,SLC25A38,FXN,FECH,EIF2AK1,BLVRB,HMBS
GO:BP	purine-containing compound metabolic process	GO:0072521	0.00314526	2.50234	567	400	29	21031	CACNB4,ABCG2,SLC2A9,FMO5,RPIA,NDUFB9,ENO3,PNP,CD38,SLC4A1,SULT1A1,PFKFB2,MCCC2,NDUFA7,GMPR,BPGM,NMNAT1,MT-ND4L,PDK2,ACSL6,KMO,TPST1,ATP6V1B2,NDUFV3,VNN1,INSR,GART,PAICS,SNCA
GO:BP	protoporphyrinogen IX metabolic process	GO:0046501	0.00344473	2.46285	12	400	5	21031	UROS,ALAS2,FECH,EIF2AK1,HMBS
GO:BP	heme biosynthetic process	GO:0006783	0.00381482	2.41853	32	400	7	21031	UROS,ALAS2,SLC6A9,SLC25A38,FXN,FECH,HMBS
GO:BP	small molecule metabolic process	GO:0044281	0.004169	2.37997	1813	400	63	21031	HAL,UROS,ABCG1,CACNB4,ABCG2,RFT1,SLC2A9,CA1,CYP4F3,NANP,FECH,FMO5,RPIA,NDUFB9,IRS2,ENO3,PNP,CD38,SLC4A1,UBIAD1,SULT1A1,PLCG2,PFKFB2,UST,GCLC,ABHD5,MCCC2,DPM2,NDUFA7,INPP5A,ALG9,LIAS,SPTLC2,ALOX5AP,GMPR,BPGM,NMNAT1,PCBD1,MT-ND4L,PDK2,ALDH5A1,SLC35A2,ACSL6,KMO,TPST1,AGMAT,CRY1,ATP6V1B2,NAAA,OSBPL2,ECHDC3,NDUFV3,VNN1,INSR,LIPT2,MMAA,GART,USP48,PAICS,PFKFB4,ACOX1,SNCA,HAGH
GO:BP	immune system process	GO:0002376	0.00509307	2.29302	2776	400	86	21031	AHSP,DAPK2,PADI4,ALAS2,CACNB4,F11R,RNASE6,TRBV10-3,SLC25A38,IL1RL1,KRT1,IL1R2,RGCC,RAB2B,CDK6,RUNX2,CD93,FLT3,IGHV3-30,TRIM10,TEC,OPTN,ZBTB16,FECH,IL16,FAM210B,DCAF12,CD274,SLAMF7,TRIM58,IRS2,PNP,NOV,TFRC,CR1L,CD38,SLC4A1,PLCG2,CCL28,SLAMF1,SUSD4,TSC22D3,MPEG1,CD180,TRBV2,IL18R1,PAK1,TRAV21,CLEC4E,CTNNBIP1,RAF1,HLA-DOB,LGALS3,POLR3A,BPGM,LILRA2,XCL2,SKAP2,SRPK2,IRF2BP2,LILRB4,EPB42,CEACAM4,DHX33,…
GO:BP	heme metabolic process	GO:0042168	0.00524867	2.27995	47	400	8	21031	UROS,ALAS2,SLC6A9,SLC25A38,FXN,FECH,BLVRB,HMBS
GO:BP	hemoglobin biosynthetic process	GO:0042541	0.00843785	2.07377	14	400	5	21031	ALAS2,SLC6A9,FECH,EIF2AK1,SLC25A37
GO:BP	purine nucleotide metabolic process	GO:0006163	0.0102853	1.98778	538	400	27	21031	CACNB4,FMO5,RPIA,NDUFB9,ENO3,PNP,CD38,SLC4A1,SULT1A1,PFKFB2,MCCC2,NDUFA7,GMPR,BPGM,NMNAT1,MT-ND4L,PDK2,ACSL6,KMO,TPST1,ATP6V1B2,NDUFV3,VNN1,INSR,GART,PAICS,SNCA
GO:BP	porphyrin-containing compound biosynthetic process	GO:0006779	0.0107508	1.96856	37	400	7	21031	UROS,ALAS2,SLC6A9,SLC25A38,FXN,FECH,HMBS
GO:BP	tetrapyrrole biosynthetic process	GO:0033014	0.0107508	1.96856	37	400	7	21031	UROS,ALAS2,SLC6A9,SLC25A38,FXN,FECH,HMBS
GO:BP	protein maturation	GO:0051604	0.0110079	1.9583	540	400	27	21031	AHSP,FKBP9,GLRX5,IL1R2,TSPAN5,FXN,MDM2,RHBDD1,FKBP5,IMMP2L,DNAJA4,DNAJC18,ISCA1,KEL,PPIH,DDI2,DNAJB6,ADAM19,IFT52,PISD,QSOX1,ST13,LIPT2,HSPA6,IMMP1L,APLF,DNAJB2
GO:BP	transport	GO:0006810	0.0113468	1.94513	4350	400	120	21031	ABCC5,CYB5A,ABCG1,CDK5R1,KCNH8,CACNB4,UNC119B,ABCG2,SLC6A9,F11R,SLC25A38,SLC18B1,RFT1,SLC2A9,SCN3A,SLC14A1,ITLN1,RGCC,RAB2B,TXNIP,XK,FXN,CD93,MMP9,SYTL3,HIP1,OPTN,SOCS2,IL16,STRADB,EIF2AK1,SLC25A51,CD163,TRIM58,IRS2,NOV,CLIC2,TFRC,MDM2,YBX1,CD38,STX6,RHBDD1,SLC4A1,KCNE1,PLCG2,STOM,PFKFB2,SEPT5,CDH1,GCLC,GRAMD1C,SELENBP1,SLAMF1,EIF2D,BBS2,MPEG1,PPP3CC,SNX22,SLC2A11,CCDC93,SLC22A15,ANP32B,PAK1,TGM2…
GO:BP	hemopoiesis	GO:0030097	0.0166051	1.77976	965	400	39	21031	AHSP,ALAS2,SLC25A38,IL1RL1,GLRX5,CDK6,RUNX2,FLT3,MMP9,TRIM10,ZBTB16,FECH,EIF2AK1,FAM210B,TRIM58,PNP,TFRC,SLC4A1,PLCG2,SLAMF1,IL18R1,CLEC4E,CTNNBIP1,BPGM,IRF2BP2,LILRB4,EPB42,PRKX,TESPA1,PIM1,PITHD1,TAL1,VNN1,FAXDC2,ADD2,PIP4K2A,FBXO7,PBX1,HLX
GO:BP	regulation of hemoglobin biosynthetic process	GO:0046984	0.0169891	1.76983	8	400	4	21031	SLC6A9,FECH,EIF2AK1,SLC25A37
GO:BP	erythrocyte differentiation	GO:0030218	0.0184065	1.73503	133	400	12	21031	AHSP,ALAS2,SLC25A38,CDK6,TRIM10,FECH,FAM210B,TRIM58,SLC4A1,BPGM,EPB42,TAL1
GO:BP	phosphate-containing compound metabolic process	GO:0006796	0.0196849	1.70587	2571	400	79	21031	PTPRK,DAPK2,CDK5R1,CACNB4,PIGU,ACP1,ITLN1,RGCC,CDK6,FLT3,MMP9,DGKG,TEC,NANP,SOCS2,FECH,FMO5,STRADB,EIF2AK1,RPIA,NDUFB9,IRS2,ENO3,PNP,TFRC,CD38,SLC4A1,SULT1A1,PLCG2,AXIN2,PFKFB2,EPHB4,ABHD5,MCCC2,DSTYK,PPP3CC,DPM2,NDUFA7,INPP5A,PAK1,SPTLC2,MAP4K5,RAF1,GMPR,LGALS3,BPGM,NMNAT1,AGK,MT-ND4L,PDK2,PPP2CB,ACSL6,SRPK2,KMO,TPST1,AIDA,PISD,LILRB4,ATP6V1B2,PRKX,ZFYVE28,PRR5L,NAAA,HUS1,PIM1,NLRP12,NDUFV3,DNAJ…
GO:BP	nitrogen compound transport	GO:0071705	0.0226256	1.6454	1911	400	63	21031	ABCC5,ABCG1,CACNB4,UNC119B,ABCG2,SLC6A9,SLC25A38,SLC18B1,SLC2A9,SLC14A1,RAB2B,TXNIP,XK,SYTL3,HIP1,OPTN,STRADB,SLC25A51,IRS2,NOV,TFRC,MDM2,YBX1,CD38,STX6,RHBDD1,PFKFB2,CDH1,SELENBP1,EIF2D,BBS2,SNX22,CCDC93,SLC22A15,ANP32B,TGM2,RAF1,SERGEF,ARL8A,TOMM6,ABCC4,AGK,MYO5A,BTF3,SLC35A2,KMO,NUP50,SNX3,PRR5L,TANGO6,AQP1,SNX30,GOLPH3L,TRMT10B,ANKRD50,RHOB,TBC1D1,USE1,VTI1B,RPAIN,SNCA,KPNA2,CLTCL1
GO:BP	myeloid cell differentiation	GO:0030099	0.0243516	1.61347	437	400	23	21031	AHSP,ALAS2,SLC25A38,IL1RL1,CDK6,MMP9,TRIM10,ZBTB16,FECH,EIF2AK1,FAM210B,TRIM58,TFRC,SLC4A1,CTNNBIP1,BPGM,LILRB4,EPB42,PRKX,PITHD1,TAL1,FAXDC2,PIP4K2A
GO:BP	erythrocyte development	GO:0048821	0.0259579	1.58573	42	400	7	21031	ALAS2,FAM210B,TRIM58,SLC4A1,BPGM,EPB42,TAL1
GO:BP	phosphorus metabolic process	GO:0006793	0.0279487	1.55364	2596	400	79	21031	PTPRK,DAPK2,CDK5R1,CACNB4,PIGU,ACP1,ITLN1,RGCC,CDK6,FLT3,MMP9,DGKG,TEC,NANP,SOCS2,FECH,FMO5,STRADB,EIF2AK1,RPIA,NDUFB9,IRS2,ENO3,PNP,TFRC,CD38,SLC4A1,SULT1A1,PLCG2,AXIN2,PFKFB2,EPHB4,ABHD5,MCCC2,DSTYK,PPP3CC,DPM2,NDUFA7,INPP5A,PAK1,SPTLC2,MAP4K5,RAF1,GMPR,LGALS3,BPGM,NMNAT1,AGK,MT-ND4L,PDK2,PPP2CB,ACSL6,SRPK2,KMO,TPST1,AIDA,PISD,LILRB4,ATP6V1B2,PRKX,ZFYVE28,PRR5L,NAAA,HUS1,PIM1,NLRP12,NDUFV3,DNAJ…
GO:BP	localization	GO:0051179	0.0295727	1.52911	5520	400	143	21031	PTPRK,ABCC5,CYB5A,ABCG1,CDK5R1,KCNH8,CACNB4,UNC119B,ABCG2,SLC6A9,F11R,SLC25A38,SLC18B1,RFT1,SLC2A9,SCN3A,SLC14A1,ITLN1,RGCC,RAB2B,TSPAN5,TXNIP,XK,FXN,CD93,MMP9,SYTL3,HIP1,OPTN,ZBTB16,RAD21,SOCS2,IL16,STRADB,EIF2AK1,SLC25A51,MSTO1,CD163,TRIM58,IRS2,NOV,CLIC2,TFRC,MDM2,YBX1,CD38,STX6,RHBDD1,SLC4A1,KCNE1,PLCG2,ZDHHC23,FAF1,STOM,AXIN2,PFKFB2,SEPT5,CDH1,GCLC,IMMP2L,ABHD5,GRAMD1C,SELENBP1,SLAMF1,EIF2D,…
GO:BP	erythrocyte homeostasis	GO:0034101	0.0358221	1.44585	142	400	12	21031	AHSP,ALAS2,SLC25A38,CDK6,TRIM10,FECH,FAM210B,TRIM58,SLC4A1,BPGM,EPB42,TAL1
REAC	Heme biosynthesis	REAC:R-HSA-189451	0.00497303	2.30338	13	273	5	10842	UROS,ALAS2,ABCG2,FECH,HMBS
REAC	Metabolism of porphyrins	REAC:R-HSA-189445	0.0133404	1.87483	25	273	6	10842	UROS,ALAS2,ABCG2,FECH,BLVRB,HMBS
WP	Hemesynthesis defects and porphyrias	WP:WP5169	0.0065357	2.18471	9	193	4	8286	UROS,ALAS2,FECH,HMBS
WP	Heme biosynthesis	WP:WP561	0.0065357	2.18471	9	193	4	8286	UROS,ALAS2,FECH,HMBS

## Sheet: ST8_GS_Phase1_2
ST8: Significant Genes (p-value < 0.05) Identified in FEV1 Phase 1 to Phase 2 Chnage Analysis
ensg	geneID	logFC	AveExpr	t	P.Value	adj.P.Val	B
ENSG00000154165	GPR15	-0.00176675	4.73243	-6.21371	5.73376e-10	7.52212e-06	7.85987
ENSG00000116990	MYCL	0.000656019	4.23361	5.60886	2.18199e-08	0.000143128	4.35991
ENSG00000157445	CACNA2D3	0.000866744	1.98361	5.09823	3.59589e-07	0.00157248	1.99899
ENSG00000139651	ZNF740	0.000266907	5.91412	4.88431	1.0807e-06	0.00354444	0.472206
ENSG00000133424	LARGE	0.00119911	2.18935	4.68106	2.95371e-06	0.00774995	-0.0662572
ENSG00000158473	CD1D	0.000519624	5.0504	4.60566	4.24636e-06	0.0082089	-0.804597
ENSG00000145354	CISD2	-0.00113507	4.5482	-4.59917	4.38008e-06	0.0082089	-0.794591
ENSG00000166068	SPRED1	-0.000827914	2.9344	-4.41111	1.05697e-05	0.017333	-1.40995
ENSG00000118985	ELL2	-0.000585791	4.02319	-4.31356	1.64733e-05	0.0224899	-2.00342
ENSG00000066279	ASPM	-0.000999904	2.58375	-4.28971	1.83366e-05	0.0224899	-1.87849
ENSG00000198833	UBE2J1	-0.000554034	6.77552	-4.28344	1.88582e-05	0.0224899	-2.27364
ENSG00000152127	MGAT5	0.000316325	6.43671	4.24691	2.21937e-05	0.0224899	-2.42916
ENSG00000174428	GTF2IRD2B	0.000371864	4.18319	4.24597	2.22859e-05	0.0224899	-2.30861
ENSG00000188175	HEPACAM2	-0.00153964	1.02602	-4.18439	2.9241e-05	0.0263344	-2.08298
ENSG00000159322	ADPGK	0.000216401	7.01513	4.1777	3.01103e-05	0.0263344	-2.71752
ENSG00000143365	RORC	0.00108008	1.46376	4.10204	4.18108e-05	0.0342823	-2.49182
ENSG00000168389	MFSD2A	0.000773035	1.382	4.07546	4.68643e-05	0.0349619	-2.57664
ENSG00000236901	MIR600HG	0.000760694	3.68647	4.07	4.79697e-05	0.0349619	-2.96492
ENSG00000155962	CLIC2	-0.000997257	2.91043	-4.03394	5.59282e-05	0.038617	-2.98862
ENSG00000123091	RNF11	-0.00105921	6.83857	-4.02163	5.89219e-05	0.0386498	-3.35568
ENSG00000165092	ALDH1A1	0.000700055	4.41084	3.97179	7.26571e-05	0.0412077	-3.45405
ENSG00000138778	CENPE	-0.000932977	2.23789	-3.96493	7.47714e-05	0.0412077	-3.15311
ENSG00000011426	ANLN	-0.000955242	1.1045	-3.9594	7.65143e-05	0.0412077	-3.01083
ENSG00000106459	NRF1	0.000232229	4.75733	3.95096	7.92525e-05	0.0412077	-3.57144
ENSG00000125375	ATP5S	-0.000477896	3.54364	-3.94659	8.07079e-05	0.0412077	-3.44069
ENSG00000165949	IFI27	-0.0026224	1.7228	-3.94374	8.16679e-05	0.0412077	-3.18339
ENSG00000139323	POC1B	-0.000568531	4.84252	-3.88361	0.000104669	0.0508575	-3.84236
ENSG00000136938	ANP32B	-0.000848617	4.54328	-3.84846	0.000120819	0.0562679	-3.94859
ENSG00000028839	TBPL1	-0.000516043	4.54973	-3.83666	0.000126745	0.0562679	-3.99635
ENSG00000141232	TOB1	-0.000362259	3.98974	-3.83294	0.000128671	0.0562679	-3.94604
ENSG00000177483	RBM44	-0.000803652	1.68242	-3.81729	0.000137079	0.0568096	-3.63525
ENSG00000125249	RAP2A	-0.000706526	5.45448	-3.79996	0.000146991	0.0568096	-4.19849
ENSG00000143162	CREG1	-0.000747088	5.95801	-3.79565	0.000149557	0.0568096	-4.23131
ENSG00000119326	CTNNAL1	-0.00121738	3.0275	-3.79337	0.000150934	0.0568096	-3.95352
ENSG00000242574	HLA-DMB	0.000445262	6.81585	3.79233	0.000151561	0.0568096	-4.24844
ENSG00000180667	YOD1	-0.00110273	7.63689	-3.75919	0.000173029	0.0630545	-4.36114
ENSG00000114166	KAT2B	-0.000646037	7.6404	-3.74375	0.00018398	0.0638022	-4.41956
ENSG00000198924	DCLRE1A	-0.000542	3.33545	-3.74262	0.000184807	0.0638022	-4.18932
ENSG00000047597	XK	-0.00129848	5.31999	-3.71835	0.000203427	0.0684297	-4.49654
ENSG00000131781	FMO5	0.000414754	3.09025	3.67974	0.000236712	0.077047	-4.38113
ENSG00000272562	RP11-396C23.4	-0.000809018	1.0582	-3.67537	0.00024079	0.077047	-4.08017
ENSG00000152484	USP12	-0.000903737	6.30144	-3.66913	0.000246718	0.077064	-4.7059
ENSG00000103365	GGA2	0.00028364	6.35103	3.66036	0.000255294	0.0776584	-4.73809
ENSG00000184205	TSPYL2	0.000421111	3.41343	3.6552	0.00026046	0.0776584	-4.52011
ENSG00000139160	METTL20	-0.00059069	1.17973	-3.63825	0.000278144	0.0810884	-4.22951
ENSG00000204252	HLA-DOA	0.00064373	4.92362	3.61426	0.000305121	0.0832251	-4.84883
ENSG00000151320	AKAP6	0.000956542	2.22114	3.61259	0.000307086	0.0832251	-4.47183
ENSG00000132185	FCRLA	0.000938866	3.68604	3.61037	0.000309718	0.0832251	-4.72389
ENSG00000184677	ZBTB40	0.000283706	6.01162	3.60942	0.000310849	0.0832251	-4.91851
ENSG00000125384	PTGER2	-0.000367955	5.14499	-3.58166	0.000345705	0.0892264	-4.98375
ENSG00000243317	C7orf73	-0.000702679	5.16293	-3.58078	0.000346867	0.0892264	-4.98987
ENSG00000153814	JAZF1	-0.00082281	4.92085	-3.54694	0.000394441	0.0980528	-5.09417
ENSG00000175970	UNC119B	0.00025726	4.37555	3.54214	0.000401669	0.0980528	-5.06187
ENSG00000133466	C1QTNF6	0.000415324	3.17039	3.54087	0.000403602	0.0980528	-4.89089
ENSG00000178935	ZNF552	0.000283752	4.28776	3.52607	0.000426769	0.101796	-5.10915
ENSG00000111726	CMAS	-0.000570622	3.655	-3.51898	0.000438287	0.102677	-5.05171
ENSG00000109436	TBC1D9	0.000384628	5.18374	3.4941	0.000481108	0.110731	-5.29655
ENSG00000005471	ABCB4	0.000951675	2.09399	3.48785	0.000492455	0.110747	-4.90128
ENSG00000163171	CDC42EP3	-0.000385341	7.13616	-3.48481	0.000498061	0.110747	-5.36065
ENSG00000181852	RNF41	0.000212355	5.89796	3.47092	0.000524469	0.112276	-5.40656
ENSG00000168795	ZBTB5	0.000248825	3.81208	3.46734	0.000531483	0.112276	-5.25013
ENSG00000136492	BRIP1	-0.000611043	2.59235	-3.45809	0.000550006	0.112276	-5.08406
ENSG00000110042	DTX4	0.00058208	2.85845	3.45479	0.000556757	0.112276	-5.13875
ENSG00000019485	PRDM11	0.000578503	2.32775	3.45193	0.000562662	0.112276	-5.06054
ENSG00000131747	TOP2A	-0.00076838	2.2945	-3.44217	0.000583305	0.112276	-5.0953
ENSG00000187912	CLEC17A	0.000899558	2.61213	3.441	0.000585814	0.112276	-5.14639
ENSG00000106701	FSD1L	-0.000713483	2.74275	-3.43776	0.000592859	0.112276	-5.1808
ENSG00000135776	ABCB10	-0.000502231	5.22179	-3.43538	0.000598063	0.112276	-5.5025
ENSG00000269404	SPIB	0.000800218	3.25788	3.4353	0.000598245	0.112276	-5.2735
ENSG00000159958	TNFRSF13C	0.000962467	1.65889	3.43082	0.000608193	0.112276	-5.03483
ENSG00000166503	HDGFRP3	-0.000794536	2.69761	-3.42745	0.000615769	0.112276	-5.20962
ENSG00000222011	FAM185A	0.000313783	2.77543	3.42675	0.000617354	0.112276	-5.2203
ENSG00000176871	WSB2	-0.000311453	5.12101	-3.42343	0.000624899	0.112276	-5.5378
ENSG00000081052	COL4A4	0.000999004	1.08073	3.41598	0.000642197	0.112276	-5.01563
ENSG00000180628	PCGF5	-0.000554912	7.4895	-3.41427	0.000646226	0.112276	-5.59817
ENSG00000110917	MLEC	0.000221732	5.90805	3.41098	0.000654054	0.112276	-5.61196
ENSG00000120708	TGFBI	0.000391669	6.59075	3.40893	0.000658988	0.112276	-5.62482
ENSG00000100614	PPM1A	-0.000617114	7.83323	-3.40177	0.000676442	0.113772	-5.63299
ENSG00000198829	SUCNR1	-0.000987821	0.887783	-3.39052	0.000704718	0.117028	-5.06618
ENSG00000134755	DSC2	-0.000879629	5.27878	-3.38511	0.000718722	0.117861	-5.6686
ENSG00000084234	APLP2	0.000318669	7.60917	3.38009	0.000731933	0.11829	-5.71098
ENSG00000186063	AIDA	-0.00051405	5.91215	-3.3773	0.000739368	0.11829	-5.7261
ENSG00000129473	BCL2L2	0.000326379	2.99087	3.36889	0.000762251	0.120482	-5.45888
ENSG00000124228	DDX27	0.000259506	5.10043	3.36327	0.000777884	0.121489	-5.73842
ENSG00000085511	MAP3K4	0.000238319	5.58893	3.359	0.000789968	0.121925	-5.77603
ENSG00000143776	CDC42BPA	-0.000808225	3.5263	-3.35167	0.000811124	0.122504	-5.60356
ENSG00000178694	NSUN3	-0.000515127	5.65279	-3.35123	0.000812396	0.122504	-5.80584
ENSG00000136895	GARNL3	0.000616996	0.820732	3.33969	0.000846804	0.125452	-5.22826
ENSG00000140943	MBTPS1	0.000169357	6.36854	3.33829	0.000851072	0.125452	-5.86258
ENSG00000172164	SNTB1	-0.000275463	4.96167	-3.33237	0.000869357	0.126723	-5.83341
ENSG00000153786	ZDHHC7	0.000266738	6.5425	3.32333	0.000897934	0.128869	-5.91296
ENSG00000068745	IP6K2	0.00020411	4.89563	3.32153	0.000903725	0.128869	-5.86446
ENSG00000274211	SOCS7	0.000233242	4.08505	3.31706	0.00091825	0.129066	-5.79724
ENSG00000100154	TTC28	0.00082848	1.11385	3.31508	0.000924785	0.129066	-5.34635
ENSG00000120833	SOCS2	-0.000484728	3.38004	-3.30641	0.000953795	0.130917	-5.72111
ENSG00000170275	CRTAP	0.000258814	5.89714	3.30517	0.000958006	0.130917	-5.96645
ENSG00000179029	TMEM107	-0.000328645	2.40849	-3.29211	0.00100347	0.134334	-5.60988
ENSG00000111666	CHPT1	-0.000707137	5.63141	-3.29201	0.00100383	0.134334	-6.0025
ENSG00000156471	PTDSS1	0.000206907	6.24141	3.28925	0.00101373	0.134334	-6.02394
ENSG00000148773	MKI67	-0.00072053	3.96618	-3.27986	0.00104796	0.137482	-5.90613
ENSG00000197465	GYPE	-0.000976657	0.869465	-3.27665	0.0010599	0.137671	-5.43781
ENSG00000182512	GLRX5	-0.000991455	6.58042	-3.2651	0.00110397	0.14199	-6.10297
ENSG00000163808	KIF15	-0.000844224	1.68143	-3.25392	0.00114823	0.144941	-5.62265
ENSG00000135045	C9orf40	-0.00061669	2.22515	-3.25372	0.00114901	0.144941	-5.70562
ENSG00000102554	KLF5	-0.000604312	1.60833	-3.24295	0.00119324	0.148813	-5.64843
ENSG00000168329	CX3CR1	-0.000503101	6.83778	-3.24077	0.00120239	0.148813	-6.18181
ENSG00000106799	TGFBR1	-0.000410009	7.20129	-3.23431	0.00122983	0.150786	-6.19963
ENSG00000287265		0.000362768	3.31133	3.2294	0.00125107	0.15197	-5.96753
ENSG00000118777	ABCG2	-0.00102501	2.10441	-3.22351	0.00127701	0.152642	-5.78406
ENSG00000213639	PPP1CB	-0.000607654	7.73506	-3.22287	0.00127987	0.152642	-6.22621
ENSG00000108932	SLC16A6	-0.000370763	4.76711	-3.2199	0.00129315	0.152736	-6.18594
ENSG00000104765	BNIP3L	-0.000860218	9.92917	-3.21573	0.00131203	0.152736	-6.18203
ENSG00000173598	NUDT4	-0.000598319	6.31691	-3.21151	0.00133143	0.152736	-6.27678
ENSG00000169031	COL4A3	0.000992726	1.23836	3.20878	0.00134408	0.152736	-5.71886
ENSG00000116678	LEPR	-0.000727357	3.44094	-3.20734	0.0013508	0.152736	-6.06353
ENSG00000172331	BPGM	-0.00108445	6.98241	-3.20675	0.0013536	0.152736	-6.28973
ENSG00000150995	ITPR1	0.000295296	7.37222	3.20102	0.0013807	0.152736	-6.30363
ENSG00000136573	BLK	0.000777649	3.59544	3.20059	0.00138276	0.152736	-6.10424
ENSG00000102445	KIAA0226L	0.000458504	6.22632	3.19802	0.00139512	0.152736	-6.3179
ENSG00000204010	IFIT1B	-0.00119475	5.0344	-3.197	0.00140004	0.152736	-6.27444
ENSG00000127080	IPPK	0.000235447	3.49145	3.19521	0.00140872	0.152736	-6.10781
ENSG00000235621	LINC00494	0.000958156	1.06368	3.18219	0.00147344	0.155817	-5.77425
ENSG00000043093	DCUN1D1	-0.00067938	6.54957	-3.18213	0.00147378	0.155817	-6.37128
ENSG00000134198	TSPAN2	-0.000582927	5.08589	-3.17935	0.00148793	0.155817	-6.33822
ENSG00000160712	IL6R	0.000309645	8.52608	3.17712	0.00149939	0.155817	-6.35105
ENSG00000143157	POGK	0.000161235	5.77196	3.17539	0.00150835	0.155817	-6.38203
ENSG00000114346	ECT2	-0.000530337	2.98315	-3.17084	0.00153209	0.155817	-6.10377
ENSG00000100490	CDKL1	-0.000538351	3.77795	-3.16777	0.00154833	0.155817	-6.2359
ENSG00000100014	SPECC1L	0.000215142	5.66562	3.1646	0.00156526	0.155817	-6.413
ENSG00000213614	HEXA	0.000192934	5.78113	3.16446	0.00156598	0.155817	-6.41717
ENSG00000076770	MBNL3	-0.000889299	8.34714	-3.16312	0.0015732	0.155817	-6.40026
ENSG00000151694	ADAM17	-0.000297446	5.99716	-3.16289	0.00157445	0.155817	-6.42786
ENSG00000242616	GNG10	-0.000715628	5.08116	-3.16192	0.00157967	0.155817	-6.39296
ENSG00000138160	KIF11	-0.000621812	2.02033	-3.15325	0.00162726	0.157244	-5.99841
ENSG00000121064	SCPEP1	0.000321098	6.19279	3.15109	0.00163927	0.157244	-6.46708
ENSG00000125485	DDX31	0.000267294	3.42418	3.14681	0.0016634	0.157244	-6.24647
ENSG00000213057	C1orf220	0.000651339	1.65538	3.14671	0.00166395	0.157244	-5.96127
ENSG00000148175	STOM	-0.000583864	7.31643	-3.14485	0.00167454	0.157244	-6.48228
ENSG00000122644	ARL4A	-0.00076106	4.5179	-3.14196	0.00169113	0.157244	-6.40772
ENSG00000135469	COQ10A	0.000312794	2.32106	3.14143	0.0016942	0.157244	-6.07885
ENSG00000008256	CYTH3	0.000399589	3.04215	3.1394	0.00170595	0.157244	-6.20672
ENSG00000066135	KDM4A	0.000203633	5.70967	3.1384	0.00171175	0.157244	-6.49737
ENSG00000185480	PARPBP	-0.000667945	1.69749	-3.13727	0.00171837	0.157244	-5.99467
ENSG00000100461	RBM23	0.000239919	6.82447	3.13317	0.0017425	0.157244	-6.52451
ENSG00000173166	RAPH1	-0.000680216	2.2222	-3.13066	0.00175741	0.157244	-6.10543
ENSG00000135070	ISCA1	-0.000673027	5.71918	-3.12957	0.0017639	0.157244	-6.52469
ENSG00000170180	GYPA	-0.00105218	3.15676	-3.12914	0.00176646	0.157244	-6.25612
ENSG00000089094	KDM2B	0.000288371	4.55044	3.12516	0.00179051	0.157244	-6.46428
ENSG00000156381	ANKRD9	-0.00114592	2.98168	-3.12427	0.00179589	0.157244	-6.25372
ENSG00000172985	SH3RF3	0.000729755	1.8529	3.12394	0.0017979	0.157244	-6.0618
ENSG00000155275	TRMT44	0.000309121	3.69447	3.12192	0.00181029	0.157279	-6.36851
ENSG00000105810	CDK6	-0.000374526	6.0946	-3.11813	0.00183366	0.158262	-6.56788
ENSG00000131368	MRPS25	0.00024833	5.07473	3.11231	0.00187011	0.160353	-6.5464
ENSG00000171604	CXXC5	0.000587065	3.47128	3.10814	0.00189663	0.161571	-6.37642
ENSG00000179922	ZNF784	0.000641668	1.45726	3.1035	0.00192651	0.163058	-6.06483
ENSG00000038210	PI4K2B	-0.000553015	4.23526	-3.09423	0.00198764	0.164361	-6.52784
ENSG00000096968	JAK2	-0.000425512	7.34638	-3.09416	0.00198809	0.164361	-6.63946
ENSG00000269973	RP11-95D17.1	-0.000446648	1.48784	-3.09311	0.00199512	0.164361	-6.1015
ENSG00000230006	ANKRD36BP2	-0.00103814	4.9083	-3.09198	0.00200267	0.164361	-6.6003
ENSG00000112335	SNX3	-0.000650738	6.96557	-3.0917	0.00200455	0.164361	-6.65207
ENSG00000196873	CBWD3	-0.000390905	5.37712	-3.08288	0.00206477	0.167723	-6.65665
ENSG00000123728	RAP2C	-0.00047854	5.06175	-3.08031	0.00208268	0.167723	-6.64724
ENSG00000106392	C1GALT1	-0.000543954	6.05528	-3.08013	0.00208392	0.167723	-6.68618
ENSG00000134531	EMP1	-0.000802162	0.958914	-3.07582	0.00211417	0.16912	-6.09698
ENSG00000118520	ARG1	-0.00095781	2.53789	-3.07163	0.00214401	0.169235	-6.34859
ENSG00000241106	HLA-DOB	0.000713489	3.31859	3.07092	0.00214914	0.169235	-6.46504
ENSG00000052802	MSMO1	-0.000551762	3.48752	-3.06982	0.00215699	0.169235	-6.49988
ENSG00000137812	CASC5	-0.000617662	2.99791	-3.06841	0.00216719	0.169235	-6.427
ENSG00000188649	CC2D2B	-0.000639864	1.59272	-3.05459	0.00226934	0.176163	-6.24255
ENSG00000176410	DNAJC30	0.000485342	1.36955	3.04446	0.002347	0.17833	-6.23275
ENSG00000162543	UBXN10	-0.000700594	1.99681	-3.04417	0.00234924	0.17833	-6.32972
ENSG00000139679	LPAR6	-0.00088893	5.28557	-3.04395	0.00235096	0.17833	-6.76944
ENSG00000123131	PRDX4	-0.000510772	2.56167	-3.04386	0.00235163	0.17833	-6.42639
ENSG00000123609	NMI	-0.000378207	5.65301	-3.03644	0.00241019	0.181338	-6.8092
ENSG00000123240	OPTN	-0.000578441	6.68022	-3.03516	0.0024204	0.181338	-6.82646
ENSG00000240230	COX19	0.000240212	5.07946	3.02813	0.00247723	0.181338	-6.80597
ENSG00000044446	PHKA2	0.000253203	5.1959	3.02755	0.00248198	0.181338	-6.81549
ENSG00000137101	CD72	0.000751256	2.58364	3.02633	0.00249199	0.181338	-6.48012
ENSG00000113812	ACTR8	0.000196667	4.83932	3.02624	0.0024928	0.181338	-6.79403
ENSG00000075856	SART3	0.000179637	5.81767	3.02449	0.0025072	0.181338	-6.84992
ENSG00000279561	AL845472.1	-0.000721451	2.38721	-3.02352	0.00251525	0.181338	-6.44848
ENSG00000176208	ATAD5	-0.000466868	3.2759	-3.02346	0.0025157	0.181338	-6.60519
ENSG00000164808	SPIDR	0.000181282	5.45196	3.02038	0.00254139	0.182189	-6.85002
ENSG00000188848	BEND4	0.000739308	1.79821	3.01499	0.00258693	0.18309	-6.38747
ENSG00000163161	ERCC3	0.000169115	5.28993	3.01266	0.00260677	0.18309	-6.86449
ENSG00000247982	LINC00926	0.000807071	4.01182	3.01255	0.00260768	0.18309	-6.74127
ENSG00000112486	CCR6	0.000660332	3.88549	3.01231	0.00260978	0.18309	-6.73077
ENSG00000110330	BIRC2	-0.000478673	6.89783	-3.00353	0.00268607	0.186952	-6.92093
ENSG00000023909	GCLM	-0.000426104	3.99372	-3.00271	0.00269334	0.186952	-6.77724
ENSG00000110958	PTGES3	-0.000487099	5.64686	-3.00038	0.00271399	0.187394	-6.91766
ENSG00000186318	BACE1	0.000573175	1.03192	2.99424	0.00276909	0.189234	-6.34229
ENSG00000174485	DENND4A	-0.000376404	7.81859	-2.99419	0.00276949	0.189234	-6.93406
ENSG00000214226	C17orf67	0.000457677	1.13789	2.98981	0.00280944	0.190857	-6.36906
ENSG00000204217	BMPR2	-0.000429034	4.65939	-2.98841	0.00282234	0.190857	-6.89273
ENSG00000145365	TIFA	-0.000424642	4.44107	-2.9812	0.0028894	0.194069	-6.89366
ENSG00000051341	POLQ	-0.000566484	1.90239	-2.98014	0.00289942	0.194069	-6.50694
ENSG00000228107	AP000692.9	0.000522029	0.798747	2.97259	0.00297155	0.194902	-6.37998
ENSG00000237803	LINC00211	-0.000626553	3.58331	-2.97176	0.0029796	0.194902	-6.81445
ENSG00000165476	REEP3	-0.00048576	4.42991	-2.97139	0.00298313	0.194902	-6.92359
ENSG00000254876	RP11-23J9.5	0.000356148	3.20681	2.97119	0.00298512	0.194902	-6.74708
ENSG00000112182	BACH2	0.000486469	5.02407	2.97108	0.00298615	0.194902	-6.96499
ENSG00000114812	VIPR1	0.000507166	3.31776	2.96761	0.00301999	0.195323	-6.77601
ENSG00000163629	PTPN13	0.000566338	3.10983	2.96737	0.00302238	0.195323	-6.74791
ENSG00000012983	MAP4K5	-0.000376957	5.46287	-2.9618	0.00307747	0.196787	-7.02476
ENSG00000008952	SEC62	-0.000570651	6.70563	-2.95981	0.00309734	0.196787	-7.05197
ENSG00000117360	PRPF3	0.000193883	5.51254	2.95953	0.00310014	0.196787	-7.03376
ENSG00000109667	SLC2A9	0.000402633	2.84085	2.95782	0.00311736	0.196787	-6.73109
ENSG00000263883	EEF1DP7	0.000502423	1.45894	2.95755	0.00312003	0.196787	-6.50657
ENSG00000168995	SIGLEC7	0.000470626	3.27152	2.95546	0.00314126	0.197031	-6.80847
ENSG00000135622	SEMA4F	0.000353312	2.84753	2.95414	0.00315466	0.197031	-6.73697
ENSG00000120278	PLEKHG1	0.000622701	3.50048	2.95274	0.00316895	0.197031	-6.84701
ENSG00000152229	PSTPIP2	-0.000364865	5.34499	-2.95052	0.00319183	0.197517	-7.05298
ENSG00000176834	VSIG10	-0.000806643	1.69564	-2.9438	0.0032618	0.199868	-6.58295
ENSG00000140968	IRF8	0.000308245	5.7988	2.94376	0.0032622	0.199868	-7.09016
ENSG00000117155	SSX2IP	-0.000513835	3.93847	-2.9406	0.00329553	0.199868	-6.95064
ENSG00000285417		0.000649068	1.1029	2.94058	0.00329575	0.199868	-6.51137
ENSG00000238105	GOLGA2P5	0.000351879	3.78882	2.93916	0.00331091	0.199868	-6.93278
ENSG00000231607	DLEU2	-0.000469557	5.33731	-2.93819	0.00332123	0.199868	-7.08946
ENSG00000131797	CLUHP3	0.00048123	4.58284	2.93582	0.00334661	0.200475	-7.0361
ENSG00000101057	MYBL2	-0.000938291	1.7538	-2.93312	0.00337584	0.201307	-6.6237
ENSG00000151136	BTBD11	0.000453146	3.59229	2.92977	0.00341235	0.202213	-6.93083
ENSG00000285557		-0.00112968	1.26911	-2.9289	0.00342185	0.202213	-6.56782
ENSG00000104219	ZDHHC2	-0.000504509	6.30693	-2.92487	0.00346637	0.203925	-7.15444
ENSG00000278175	GLIDR	0.000613928	1.12507	2.92029	0.00351768	0.20602	-6.5709
ENSG00000119950	MXI1	-0.000824198	7.76952	-2.91781	0.00354573	0.20674	-7.15947
ENSG00000229124	VIM-AS1	-0.000277512	4.46855	-2.9132	0.00359834	0.207586	-7.09729
ENSG00000171860	C3AR1	-0.000559992	3.94015	-2.9128	0.00360296	0.207586	-7.03863
ENSG00000259834	RP11-284N8.3	-0.000618424	5.11791	-2.91239	0.00360771	0.207586	-7.14692
ENSG00000141682	PMAIP1	-0.00057109	2.78862	-2.91048	0.00362975	0.207638	-6.86241
ENSG00000101782	RIOK3	-0.000753389	8.20687	-2.90957	0.00364027	0.207638	-7.17273
ENSG00000004897	CDC27	-0.000408105	6.56746	-2.90535	0.00368968	0.209545	-7.21189
ENSG00000164823	OSGIN2	-0.000468573	5.55161	-2.9029	0.00371859	0.210277	-7.20047
ENSG00000100577	GSTZ1	0.0003538	2.63636	2.89552	0.00380687	0.211239	-6.87563
ENSG00000223865	HLA-DPB1	0.000400457	7.39659	2.89476	0.0038161	0.211239	-7.23424
ENSG00000221823	PPP3R1	-0.000600037	6.12612	-2.89434	0.00382118	0.211239	-7.24098
ENSG00000214279	SCART1	0.000755171	1.82229	2.89323	0.00383471	0.211239	-6.758
ENSG00000225611	RP11-70C1.1	0.000655631	0.882756	2.89299	0.00383771	0.211239	-6.62763
ENSG00000173950	XXYLT1	0.000365027	2.30645	2.88902	0.0038864	0.211239	-6.83695
ENSG00000078070	MCCC1	0.000210381	4.00018	2.88892	0.00388753	0.211239	-7.11019
ENSG00000132330	SCLY	0.000368421	2.70872	2.88789	0.00390027	0.211239	-6.90692
ENSG00000132704	FCRL2	0.000791409	3.88475	2.88777	0.00390177	0.211239	-7.08997
ENSG00000151503	NCAPD3	0.000190336	4.75796	2.88724	0.00390828	0.211239	-7.19674
ENSG00000137462	TLR2	-0.000443573	8.48595	-2.88676	0.00391424	0.211239	-7.23001
ENSG00000141034	GID4	-0.000532889	3.98989	-2.8832	0.00395873	0.211239	-7.13182
ENSG00000288156		0.000366784	4.91844	2.88181	0.00397612	0.211239	-7.22701
ENSG00000198252	STYX	-0.000495484	5.22978	-2.88143	0.0039809	0.211239	-7.24686
ENSG00000197943	PLCG2	0.000245609	7.59447	2.87831	0.00402051	0.211239	-7.27815
ENSG00000133742	CA1	-0.00124718	6.17777	-2.87663	0.00404193	0.211239	-7.2896
ENSG00000162408	NOL9	0.000227021	4.78524	2.87657	0.00404271	0.211239	-7.22875
ENSG00000166860	ZBTB39	0.000256975	3.70685	2.87593	0.00405078	0.211239	-7.10567
ENSG00000170035	UBE2E3	-0.00036165	3.60356	-2.87335	0.00408397	0.211239	-7.10105
ENSG00000196411	EPHB4	0.000725385	2.95795	2.87319	0.004086	0.211239	-6.99604
ENSG00000250361	GYPB	-0.000959553	4.26111	-2.87171	0.00410522	0.211239	-7.19112
ENSG00000205476	CCDC85C	0.000609029	0.941562	2.87068	0.00411854	0.211239	-6.69516
ENSG00000100105	PATZ1	0.000362074	3.92447	2.86927	0.0041369	0.211239	-7.15706
ENSG00000122591	FAM126A	-0.000367923	5.86245	-2.86878	0.00414338	0.211239	-7.30891
ENSG00000176994	SMCR8	0.000220471	6.50079	2.86608	0.00417878	0.211239	-7.32509
ENSG00000100221	JOSD1	0.000211561	5.32076	2.86308	0.0042184	0.211239	-7.30491
ENSG00000170571	EMB	-0.000470414	7.77757	-2.86241	0.00422738	0.211239	-7.31978
ENSG00000272888	LINC01578	-0.000563093	6.65325	-2.86058	0.00425181	0.211239	-7.34061
ENSG00000177565	TBL1XR1	-0.000462065	7.49279	-2.85998	0.00425981	0.211239	-7.333
ENSG00000179088	C12orf42	0.00050726	1.58365	2.85952	0.004266	0.211239	-6.80913
ENSG00000125257	ABCC4	-0.000567393	5.34673	-2.85891	0.00427415	0.211239	-7.318
ENSG00000145191	EIF2B5	0.000183846	5.27086	2.85884	0.0042751	0.211239	-7.31381
ENSG00000112308	C6orf62	-0.000391194	7.45783	-2.85746	0.00429371	0.211239	-7.34078
ENSG00000115540	MOB4	-0.00049983	4.53431	-2.85703	0.00429955	0.211239	-7.26595
ENSG00000172159	FRMD3	-0.000574514	2.62941	-2.8562	0.00431079	0.211239	-6.98447
ENSG00000108094	CUL2	-0.000321316	4.23251	-2.85587	0.00431526	0.211239	-7.23632
ENSG00000170365	SMAD1	-0.000593163	1.73294	-2.8518	0.00437078	0.211878	-6.87101
ENSG00000255833	TIFAB	0.000707812	1.12938	2.85075	0.00438511	0.211878	-6.77576
ENSG00000174607	UGT8	0.000705327	1.35547	2.84855	0.00441559	0.211878	-6.81434
ENSG00000243064	ABCC13	-0.000997503	2.97335	-2.84708	0.00443588	0.211878	-7.07105
ENSG00000139826	ABHD13	-0.000577616	5.4791	-2.84406	0.00447806	0.211878	-7.36759
ENSG00000144645	OSBPL10	0.000714351	3.37734	2.84221	0.00450408	0.211878	-7.14933
ENSG00000012124	CD22	0.000747643	3.93772	2.84216	0.0045048	0.211878	-7.22915
ENSG00000127314	RAP1B	-0.000405422	7.78066	-2.84156	0.00451332	0.211878	-7.3793
ENSG00000109534	GAR1	-0.000587439	1.23379	-2.84073	0.00452508	0.211878	-6.81403
ENSG00000162194	LBHD1	0.000331933	2.56468	2.83894	0.00455046	0.211878	-7.02318
ENSG00000213047	DENND1B	-0.000415745	5.65556	-2.83699	0.00457819	0.211878	-7.39389
ENSG00000143797	MBOAT2	-0.0004581	6.15533	-2.8359	0.00459381	0.211878	-7.40774
ENSG00000132530	XAF1	-0.000672789	6.38779	-2.83562	0.00459785	0.211878	-7.41027
ENSG00000135144	DTX1	0.000839655	0.987513	2.83501	0.00460663	0.211878	-6.8046
ENSG00000104756	KCTD9	-0.000357613	4.29934	-2.83476	0.00461027	0.211878	-7.30307
ENSG00000172671	ZFAND4	-0.000349264	4.591	-2.83416	0.00461887	0.211878	-7.33432
ENSG00000104824	HNRNPL	0.00020393	7.05912	2.83241	0.00464416	0.211878	-7.41777
ENSG00000146373	RNF217	-0.000473635	3.06052	-2.83222	0.00464696	0.211878	-7.13154
ENSG00000143771	CNIH4	-0.000264339	4.86429	-2.83115	0.00466247	0.211878	-7.36765
ENSG00000107758	PPP3CB	-0.000356282	5.19746	-2.8301	0.00467777	0.211878	-7.39262
ENSG00000179542	SLITRK4	-0.000543867	2.38858	-2.82953	0.00468608	0.211878	-7.03065
ENSG00000266127	ZNF415P1	-0.000558363	1.69823	-2.82941	0.00468792	0.211878	-6.9132
ENSG00000115641	FHL2	-0.000831002	0.936295	-2.8286	0.00469978	0.211878	-6.81463
ENSG00000111364	DDX55	0.000215387	3.96154	2.8273	0.00471882	0.212008	-7.28074
ENSG00000135686	KLHL36	0.000211753	6.30543	2.82307	0.00478139	0.213945	-7.44597
ENSG00000175348	TMEM9B	-0.000321791	5.22834	-2.82207	0.0047963	0.213945	-7.41746
ENSG00000143353	LYPLAL1	-0.00051965	3.87697	-2.82109	0.00481088	0.213945	-7.28687
ENSG00000099246	RAB18	-0.000422952	6.07099	-2.81938	0.00483654	0.21426	-7.45429
ENSG00000124098	FAM210B	-0.000875837	7.99038	-2.81845	0.00485061	0.21426	-7.43852
ENSG00000182885	GPR97	0.000592917	5.53018	2.8172	0.00486945	0.21437	-7.4398
ENSG00000088325	TPX2	-0.000591747	1.41624	-2.81491	0.00490428	0.214856	-6.9163
ENSG00000189050	RNFT1	-0.000328731	4.37855	-2.81432	0.00491323	0.214856	-7.37106
ENSG00000117500	TMED5	-0.000447915	6.36499	-2.81119	0.00496121	0.215387	-7.48011
ENSG00000083454	P2RX5	0.000583268	3.8234	2.80937	0.00498921	0.215387	-7.31041
ENSG00000154114	TBCEL	-0.000538967	5.57911	-2.80936	0.00498936	0.215387	-7.46827
ENSG00000149131	SERPING1	-0.00109169	2.04072	-2.80925	0.00499106	0.215387	-7.02027
ENSG00000164048	ZNF589	0.000240164	4.85496	2.8041	0.0050713	0.218132	-7.44055
ENSG00000213906	LTB4R2	0.000436494	2.46446	2.80268	0.00509369	0.21838	-7.10781
ENSG00000106066	CPVL	0.000368561	6.89479	2.80142	0.00511358	0.218518	-7.50535
ENSG00000229106	RP11-4M23.2	0.000682611	1.06312	2.79767	0.00517318	0.219542	-6.92307
ENSG00000130803	ZNF317	0.000156959	5.37707	2.79717	0.00518123	0.219542	-7.49425
ENSG00000145386	CCNA2	-0.000632899	0.905145	-2.79676	0.00518774	0.219542	-6.90285
ENSG00000047621	C12orf4	-0.000351676	3.81765	-2.79243	0.00525755	0.220824	-7.361
ENSG00000144554	FANCD2	0.000239446	4.34648	2.79149	0.0052729	0.220824	-7.42969
ENSG00000162923	WDR26	-0.000441304	7.85445	-2.79094	0.00528173	0.220824	-7.5195
ENSG00000073792	IGF2BP2	-0.00087039	4.92871	-2.79072	0.00528537	0.220824	-7.48429
ENSG00000051620	HEBP2	0.00029359	6.63901	2.7891	0.00531184	0.220933	-7.54117
ENSG00000103051	COG4	0.000213506	5.44143	2.7885	0.00532166	0.220933	-7.52148
ENSG00000136021	SCYL2	-0.000354033	6.38946	-2.78658	0.00535324	0.221374	-7.54914
ENSG00000152683	SLC30A6	-0.000314282	5.04564	-2.7858	0.00536603	0.221374	-7.50721
ENSG00000049759	NEDD4L	-0.000544328	3.48739	-2.78441	0.00538915	0.221631	-7.33619
ENSG00000109332	UBE2D3	-0.000324876	8.72911	-2.78225	0.005425	0.221809	-7.51894
ENSG00000122643	NT5C3A	-0.000465521	5.28628	-2.78149	0.00543768	0.221809	-7.53368
ENSG00000170802	FOXN2	-0.000434686	6.80438	-2.7811	0.00544419	0.221809	-7.56368
ENSG00000136932	C9orf156	0.000176113	5.19535	2.77812	0.00549433	0.223158	-7.53781
ENSG00000149212	SESN3	-0.000531369	7.96326	-2.77483	0.00555005	0.223729	-7.56158
ENSG00000135535	CD164	-0.000442472	7.7875	-2.77336	0.00557525	0.223729	-7.57009
ENSG00000139266	MARCH9	0.000370236	2.76544	2.77333	0.00557576	0.223729	-7.24277
ENSG00000183508	FAM46C	-0.000961277	9.92329	-2.77224	0.00559441	0.223729	-7.50649
ENSG00000144218	AFF3	0.000640715	4.49483	2.76747	0.00567679	0.223729	-7.50446
ENSG00000145911	N4BP3	0.000844532	1.0121	2.76625	0.00569793	0.223729	-7.00563
ENSG00000174946	GPR171	-0.000560964	4.08954	-2.76567	0.005708	0.223729	-7.46681
ENSG00000156735	BAG4	-0.000336586	4.18044	-2.76511	0.00571778	0.223729	-7.48647
ENSG00000260231	JHDM1D-AS1	-0.000726579	3.11349	-2.7648	0.00572337	0.223729	-7.32925
ENSG00000185112	FAM43A	0.00055448	3.3789	2.76467	0.00572563	0.223729	-7.3666
ENSG00000136305	CIDEB	0.00036415	4.16005	2.76448	0.00572895	0.223729	-7.4846
ENSG00000154813	DPH3	-0.000372906	4.20519	-2.76447	0.00572904	0.223729	-7.49102
ENSG00000072401	UBE2D1	-0.000631901	5.83642	-2.7623	0.00576728	0.223729	-7.60643
ENSG00000122965	RBM19	0.000285048	5.00036	2.7613	0.00578486	0.223729	-7.56964
ENSG00000023902	PLEKHO1	0.000303754	6.68071	2.76129	0.00578503	0.223729	-7.61905
ENSG00000134897	BIVM	-0.000392209	3.0703	-2.76083	0.00579324	0.223729	-7.32853
ENSG00000250616	RP11-455F5.3	0.000483609	3.43357	2.76054	0.0057983	0.223729	-7.38986
ENSG00000181704	YIPF6	-0.0003789	5.48688	-2.75846	0.00583527	0.224495	-7.60728
ENSG00000197170	PSMD12	-0.000348824	4.89099	-2.7565	0.00587035	0.224618	-7.5777
ENSG00000206560	ANKRD28	-0.000332437	5.71434	-2.75551	0.00588812	0.224618	-7.62272
ENSG00000125450	NUP85	0.000220787	4.14514	2.75337	0.0059266	0.224618	-7.51266
ENSG00000267430	RP11-635N19.2	0.000296741	2.83978	2.75311	0.00593124	0.224618	-7.30821
ENSG00000064225	ST3GAL6	-0.000388101	4.06128	-2.75286	0.00593577	0.224618	-7.50627
ENSG00000138600	SPPL2A	-0.00030826	5.93013	-2.75256	0.00594119	0.224618	-7.63773
ENSG00000213281	NRAS	-0.000364018	5.62674	-2.74831	0.00601865	0.226341	-7.64036
ENSG00000010810	FYN	0.000183214	7.23931	2.74797	0.00602487	0.226341	-7.6505
ENSG00000116489	CAPZA1	-0.000441853	7.80185	-2.74594	0.00606218	0.226341	-7.64491
ENSG00000198826	ARHGAP11A	-0.000523288	2.40598	-2.74416	0.00609516	0.226341	-7.26235
ENSG00000175073	VCPIP1	-0.000303028	7.62256	-2.74306	0.00611558	0.226341	-7.65725
ENSG00000065911	MTHFD2	-0.0003241	4.77424	-2.74191	0.00613695	0.226341	-7.6096
ENSG00000065600	TMEM206	0.000219308	3.32378	2.74132	0.00614791	0.226341	-7.42492
ENSG00000137628	DDX60	-0.000603076	6.52194	-2.74034	0.00616624	0.226341	-7.67605
ENSG00000102384	CENPI	-0.000622369	1.25907	-2.73474	0.00627193	0.226341	-7.11094
ENSG00000087301	TXNDC16	-0.000431465	4.32892	-2.73416	0.00628294	0.226341	-7.58634
ENSG00000145331	TRMT10A	-0.000511447	1.85149	-2.73401	0.0062859	0.226341	-7.19934
ENSG00000197045	GMFB	-0.000650861	5.53168	-2.73389	0.00628804	0.226341	-7.67665
ENSG00000140153	WDR20	0.000140752	5.016	2.73384	0.00628914	0.226341	-7.64859
ENSG00000180776	ZDHHC20	-0.00041131	6.89948	-2.73316	0.00630207	0.226341	-7.6948
ENSG00000034713	GABARAPL2	-0.000502958	6.19191	-2.73296	0.00630597	0.226341	-7.69529
ENSG00000259956	RBM15B	0.000232104	5.85626	2.73293	0.0063064	0.226341	-7.68911
ENSG00000104626	ERI1	-0.00035227	4.23301	-2.73273	0.00631022	0.226341	-7.57924
ENSG00000113966	ARL6	-0.000556268	1.82172	-2.73107	0.00634207	0.226341	-7.20292
ENSG00000160683	CXCR5	0.00068133	3.4055	2.73054	0.00635235	0.226341	-7.46511
ENSG00000120217	CD274	-0.000631178	4.01106	-2.73016	0.00635958	0.226341	-7.55397
ENSG00000131355	EMR3	0.000351954	6.33667	2.7301	0.00636072	0.226341	-7.70102
ENSG00000114209	PDCD10	-0.000482306	5.02635	-2.72981	0.00636632	0.226341	-7.66056
ENSG00000111711	GOLT1B	-0.000613967	4.43089	-2.72879	0.00638607	0.226429	-7.6116
ENSG00000111110	PPM1H	0.000453748	1.84204	2.72713	0.0064181	0.226952	-7.22062
ENSG00000197860	SGTB	-0.000384617	5.53332	-2.7256	0.00644794	0.227394	-7.69876
ENSG00000238113	LINC01410	-0.000480691	4.94454	-2.72471	0.00646531	0.227395	-7.66741
ENSG00000119487	MAPKAP1	0.000127988	5.79345	2.72158	0.00652669	0.228342	-7.71839
ENSG00000229358	DPY19L1P1	-0.000786836	2.07117	-2.72115	0.00653518	0.228342	-7.27089
ENSG00000186184	POLR1D	-0.000403035	5.73131	-2.71953	0.00656722	0.228342	-7.72206
ENSG00000143390	RFX5	0.000177934	5.73491	2.71925	0.00657277	0.228342	-7.72192
ENSG00000175582	RAB6A	-0.000324237	6.4694	-2.71841	0.00658955	0.228342	-7.73667
ENSG00000117228	GBP1	-0.000612675	7.12364	-2.71805	0.00659666	0.228342	-7.73394
ENSG00000121486	TRMT1L	-0.000300135	4.6232	-2.71646	0.00662833	0.228612	-7.66454
ENSG00000078140	UBE2K	-0.000383151	5.38966	-2.71418	0.006674	0.228612	-7.72352
ENSG00000124333	VAMP7	-0.000429144	5.17097	-2.71371	0.00668358	0.228612	-7.71416
ENSG00000161813	LARP4	-0.000363256	4.99681	-2.71304	0.00669704	0.228612	-7.70299
ENSG00000210082	MT-RNR2	-0.00104656	9.67106	-2.71121	0.00673394	0.228612	-7.68225
ENSG00000166200	COPS2	-0.000579778	4.96072	-2.71078	0.00674265	0.228612	-7.70801
ENSG00000138376	BARD1	-0.000381174	3.94247	-2.71	0.00675863	0.228612	-7.60572
ENSG00000164398	ACSL6	-0.000458643	4.71814	-2.70995	0.00675968	0.228612	-7.68645
ENSG00000105887	MTPN	-0.000395402	7.96258	-2.70987	0.00676128	0.228612	-7.73958
ENSG00000139618	BRCA2	-0.00052592	3.21788	-2.70796	0.00680026	0.228852	-7.4978
ENSG00000144290	SLC4A10	0.00113898	1.6431	2.70781	0.0068033	0.228852	-7.24877
ENSG00000270800	RPS10-NUDT3	0.000683474	3.83165	2.70568	0.00684696	0.229609	-7.60347
ENSG00000264663	KRT8P34	0.000512448	1.13684	2.70473	0.0068665	0.229609	-7.18095
ENSG00000168395	ING5	0.000269812	4.51911	2.70416	0.0068783	0.229609	-7.68588
ENSG00000261150	EPPK1	0.00106556	2.64606	2.70272	0.00690808	0.230018	-7.40337
ENSG00000101391	CDK5RAP1	0.000176047	4.25413	2.70063	0.00695155	0.23088	-7.66741
ENSG00000244115	DNAJC25-GNG10	-0.00077374	3.19931	-2.69844	0.00699735	0.231719	-7.52786
ENSG00000062524	LTK	0.000877761	1.11642	2.69639	0.00704061	0.231719	-7.20878
ENSG00000104343	UBE2W	-0.000496722	6.20224	-2.69607	0.00704724	0.231719	-7.79511
ENSG00000173930	SLCO4C1	-0.000432195	4.71475	-2.69606	0.00704748	0.231719	-7.72663
ENSG00000272345	RP1-30M3.5	-0.000688388	1.24076	-2.69518	0.00706615	0.231752	-7.21526
ENSG00000133069	TMCC2	-0.000973758	4.36159	-2.69334	0.00710512	0.23223	-7.69882
ENSG00000173085	COQ2	0.000257487	3.15344	2.69282	0.00711613	0.23223	-7.53086
ENSG00000150637	CD226	-0.000373338	6.87481	-2.69123	0.00715009	0.232759	-7.80814
ENSG00000196569	LAMA2	0.000623447	1.05862	2.68743	0.00723191	0.23363	-7.21434
ENSG00000160593	AMICA1	0.000212225	9.56654	2.68712	0.0072386	0.23363	-7.75144
ENSG00000244701	RP5-894A10.2	0.000422443	1.44862	2.68692	0.00724297	0.23363	-7.26752
ENSG00000185220	PGBD2	0.000203459	3.54004	2.68668	0.00724807	0.23363	-7.60735
ENSG00000183826	BTBD9	0.000182057	5.20328	2.68574	0.00726844	0.233712	-7.7894
ENSG00000103275	UBE2I	0.000228459	6.07858	2.68465	0.00729218	0.233818	-7.82411
ENSG00000136682	CBWD2	-0.000377516	4.91311	-2.68395	0.00730736	0.233818	-7.77654
ENSG00000173542	MOB1B	-0.00051171	5.05888	-2.68248	0.00733958	0.233859	-7.78974
ENSG00000149516	MS4A3	-0.000974242	1.89201	-2.68226	0.00734431	0.233859	-7.35956
ENSG00000151491	EPS8	-0.000574013	0.807538	-2.68142	0.00736279	0.23388	-7.20741
ENSG00000177917	ARL6IP6	-0.000267673	4.37482	-2.67845	0.00742835	0.235304	-7.74335
ENSG00000196150	ZNF250	0.000210029	3.49451	2.67776	0.00744348	0.235304	-7.62251
ENSG00000157045	NTAN1	-0.000420349	3.88793	-2.67642	0.00747337	0.235681	-7.69034
ENSG00000112983	BRD8	0.000216965	4.53623	2.67487	0.00750795	0.236203	-7.76812
ENSG00000100387	RBX1	-0.000442782	4.10632	-2.67257	0.00755955	0.237258	-7.72848
ENSG00000167483	FAM129C	0.000669773	4.33955	2.67155	0.00758236	0.237406	-7.74997
ENSG00000101773	RBBP8	-0.000443109	3.41437	-2.67038	0.00760883	0.237667	-7.63535
ENSG00000196975	ANXA4	-0.000251787	4.47424	-2.66643	0.00769861	0.2399	-7.78513
ENSG00000136144	RCBTB1	-0.000265261	4.68567	-2.66451	0.00774269	0.240463	-7.80989
ENSG00000181788	SIAH2	-0.000751635	6.79311	-2.66363	0.00776301	0.240463	-7.88229
ENSG00000115902	SLC1A4	-0.000367588	2.75967	-2.66307	0.00777594	0.240463	-7.54371
ENSG00000138496	PARP9	-0.000426018	7.23937	-2.66246	0.00778999	0.240463	-7.88155
ENSG00000186074	CD300LF	0.000271885	5.2768	2.66096	0.00782467	0.24078	-7.86101
ENSG00000177409	SAMD9L	-0.00055772	7.92604	-2.65892	0.00787214	0.24078	-7.87754
ENSG00000107798	LIPA	-0.00037617	5.89677	-2.65802	0.00789315	0.24078	-7.89176
ENSG00000141622	RNF165	0.000761499	1.22945	2.65789	0.00789613	0.24078	-7.31365
ENSG00000133703	KRAS	-0.000379996	6.1649	-2.65744	0.00790669	0.24078	-7.89824
ENSG00000068878	PSME4	-0.000363715	6.9131	-2.65588	0.00794318	0.24078	-7.90278
ENSG00000119048	UBE2B	-0.000471259	5.91847	-2.65508	0.00796203	0.24078	-7.89996
ENSG00000089022	MAPKAPK5	0.000166184	5.26088	2.6546	0.00797343	0.24078	-7.8754
ENSG00000178726	THBD	0.000565452	4.25031	2.65434	0.00797949	0.24078	-7.79303
ENSG00000144320	KIAA1715	-0.000365003	5.30721	-2.65416	0.00798377	0.24078	-7.88072
ENSG00000010030	ETV7	-0.00119679	1.59574	-2.65082	0.00806294	0.241309	-7.37889
ENSG00000143158	MPC2	-0.000323574	4.358	-2.65045	0.0080718	0.241309	-7.81619
ENSG00000104549	SQLE	-0.000371958	2.7809	-2.65042	0.00807248	0.241309	-7.57842
ENSG00000232629	HLA-DQB2	0.00231672	1.58008	2.64749	0.0081427	0.241309	-7.38942
ENSG00000257093	KIAA1147	0.000204459	6.62758	2.64721	0.00814944	0.241309	-7.92597
ENSG00000111790	FGFR1OP2	-0.000393639	6.32045	-2.64645	0.00816772	0.241309	-7.92871
ENSG00000081177	EXD2	0.000244333	2.71372	2.64612	0.00817567	0.241309	-7.57501
ENSG00000104442	ARMC1	-0.000365128	4.35552	-2.64443	0.00821665	0.241309	-7.82883
ENSG00000174442	ZWILCH	-0.00041641	2.57419	-2.64403	0.00822636	0.241309	-7.55972
ENSG00000140403	DNAJA4	-0.000597329	4.77311	-2.64238	0.00826642	0.241309	-7.87641
ENSG00000183111	ARHGEF37	-0.000929408	1.42395	-2.64111	0.00829728	0.241309	-7.38989
ENSG00000097033	SH3GLB1	-0.000296595	7.22308	-2.64106	0.00829861	0.241309	-7.93824
ENSG00000163535	SGOL2	-0.000676914	1.69834	-2.64002	0.00832397	0.241309	-7.43074
ENSG00000037637	FBXO42	0.000156683	5.34437	2.64001	0.00832439	0.241309	-7.91961
ENSG00000143401	ANP32E	-0.000504914	5.11521	-2.64	0.00832446	0.241309	-7.90604
ENSG00000153395	LPCAT1	0.00027748	6.28688	2.63891	0.00835121	0.241309	-7.94814
ENSG00000113638	TTC33	-0.000436348	4.32647	-2.6387	0.00835641	0.241309	-7.84273
ENSG00000099910	KLHL22	0.000374275	4.40386	2.63633	0.00841491	0.241309	-7.85613
ENSG00000130517	PGPEP1	0.000252984	4.19586	2.63613	0.00841998	0.241309	-7.83386
ENSG00000169598	DFFB	0.000254541	3.24757	2.63578	0.00842849	0.241309	-7.69536
ENSG00000163251	FZD5	-0.000558184	1.61567	-2.63534	0.00843953	0.241309	-7.4291
ENSG00000260261	RP11-480A16.1	0.000382299	2.63019	2.6353	0.00844055	0.241309	-7.59047
ENSG00000165434	PGM2L1	-0.000425246	4.29029	-2.63469	0.00845573	0.241309	-7.84698
ENSG00000187147	RNF220	0.00026647	5.11093	2.63426	0.00846639	0.241309	-7.9211
ENSG00000178966	RMI1	-0.000391275	3.44789	-2.63378	0.0084783	0.241309	-7.73629
ENSG00000135218	CD36	-0.000443646	7.1826	-2.63323	0.00849194	0.241309	-7.95859
ENSG00000101146	RAE1	0.000146701	4.51157	2.63299	0.00849795	0.241309	-7.87729
ENSG00000162616	DNAJB4	-0.000503117	2.38599	-2.63015	0.00856915	0.24189	-7.56094
ENSG00000172915	NBEA	0.000496579	3.24284	2.62932	0.0085901	0.24189	-7.70547
ENSG00000167434	CA4	0.000565051	2.7852	2.62927	0.00859148	0.24189	-7.64295
ENSG00000101265	RASSF2	0.000247879	9.64446	2.62924	0.00859218	0.24189	-7.90215
ENSG00000204599	TRIM39	0.000169152	4.69707	2.62446	0.0087135	0.244186	-7.9164
ENSG00000099194	SCD	-0.000526716	1.39775	-2.62429	0.0087179	0.244186	-7.42991
ENSG00000113269	RNF130	0.000226424	7.52502	2.62383	0.00872956	0.244186	-7.97803
ENSG00000163534	FCRL1	0.000687183	5.04272	2.6217	0.0087841	0.244985	-7.94149
ENSG00000112679	DUSP22	0.000191006	6.01002	2.62065	0.0088112	0.244985	-7.9927
ENSG00000066926	FECH	-0.000865329	7.18927	-2.62028	0.00882066	0.244985	-7.99277
ENSG00000228716	DHFR	-0.000308764	3.811	-2.61961	0.00883796	0.244985	-7.8286
ENSG00000162144	CYB561A3	0.00037632	4.92308	2.61898	0.00885434	0.244985	-7.94795
ENSG00000065923	SLC9A7	0.000380418	4.59993	2.61837	0.00887017	0.244985	-7.91999
ENSG00000114127	XRN1	-0.000352814	7.72557	-2.61607	0.00892997	0.246118	-7.99504
ENSG00000135709	KIAA0513	0.000381576	6.65471	2.61408	0.00898227	0.246425	-8.01352
ENSG00000148488	ST8SIA6	-0.000520649	2.17658	-2.61368	0.00899262	0.246425	-7.56803
ENSG00000196220	SRGAP3	0.000437022	1.86768	2.6135	0.00899746	0.246425	-7.53035
ENSG00000100813	ACIN1	0.000168943	7.3227	2.61093	0.00906508	0.24675	-8.01607
ENSG00000188994	ZNF292	-0.000371333	7.9829	-2.61034	0.00908077	0.24675	-8.00362
ENSG00000184428	TOP1MT	0.000473273	2.77604	2.60959	0.00910075	0.24675	-7.68713
ENSG00000102221	JADE3	0.00056228	1.09937	2.60918	0.00911155	0.24675	-7.42922
ENSG00000124225	PMEPA1	0.000607169	1.02565	2.6074	0.00915892	0.24675	-7.43116
ENSG00000181827	RFX7	-0.000330636	5.07816	-2.6064	0.00918563	0.24675	-7.99075
ENSG00000101577	LPIN2	-0.000315641	7.16162	-2.60604	0.0091954	0.24675	-8.03118
ENSG00000180758	GPR157	0.000394707	2.15254	2.60569	0.00920482	0.24675	-7.58589
ENSG00000084093	REST	-0.000293669	6.40418	-2.60465	0.00923258	0.24675	-8.03842
ENSG00000138166	DUSP5	-0.000390034	3.67772	-2.60363	0.00926029	0.24675	-7.84554
ENSG00000198160	MIER1	-0.000418048	6.73809	-2.60328	0.00926949	0.24675	-8.04206
ENSG00000176018	LYSMD3	-0.000545845	5.2475	-2.60281	0.00928236	0.24675	-8.01211
ENSG00000173198	CYSLTR1	-0.000325536	5.13972	-2.60221	0.0092984	0.24675	-8.00672
ENSG00000069956	MAPK6	-0.000332966	4.42658	-2.60221	0.00929847	0.24675	-7.94817
ENSG00000150337	FCGR1A	-0.000680849	5.04903	-2.60208	0.00930209	0.24675	-7.99933
ENSG00000281357	ARRDC3-AS1	-0.000331365	1.97807	-2.60178	0.00931024	0.24675	-7.57167
ENSG00000112294	ALDH5A1	-0.000579064	4.53548	-2.60067	0.00934018	0.247044	-7.96296
ENSG00000156853	ZNF689	0.000253341	3.52559	2.59872	0.00939341	0.247897	-7.83714
ENSG00000170089	RP11-423H2.1	0.000384547	4.12837	2.59811	0.00941021	0.247897	-7.9209
ENSG00000215126	CBWD7	-0.000541455	4.03785	-2.59634	0.00945856	0.248526	-7.91796
ENSG00000171488	LRRC8C	-0.000302351	6.43997	-2.59585	0.00947197	0.248526	-8.06051
ENSG00000275454	CTD-2026K11.4	0.000568642	0.689315	2.59511	0.00949258	0.248569	-7.42089
ENSG00000196092	PAX5	0.00073201	3.73474	2.5943	0.00951475	0.248653	-7.87356
ENSG00000168785	TSPAN5	-0.000724657	6.71549	-2.59332	0.00954183	0.248865	-8.06689
ENSG00000111275	ALDH2	0.000351688	5.17442	2.59237	0.00956829	0.24906	-8.034
ENSG00000178789	CD300LB	0.00036563	4.94489	2.59164	0.00958868	0.249097	-8.02129
ENSG00000198019	FCGR1B	-0.000589069	5.05606	-2.58933	0.00965316	0.250039	-8.03242
ENSG00000113615	SEC24A	-0.000315167	4.46909	-2.58897	0.00966306	0.250039	-7.98831
ENSG00000224616	RTCA-AS1	-0.000349769	3.7863	-2.58661	0.00972937	0.251259	-7.90724
ENSG00000117000	RLF	-0.000321473	6.37434	-2.5827	0.00984018	0.253621	-8.09544
ENSG00000174749	C4orf32	-0.000452385	3.32882	-2.58198	0.00986057	0.253649	-7.8491
ENSG00000198771	RCSD1	0.000179551	8.02695	2.58082	0.00989393	0.253846	-8.0788
ENSG00000135473	PAN2	0.000211789	5.02044	2.57978	0.00992373	0.253846	-8.05536
ENSG00000133302	ANKRD32	-0.000447985	4.58645	-2.57799	0.00997508	0.253846	-8.02561
ENSG00000198919	DZIP3	-0.000424536	4.13496	-2.57577	0.0100391	0.253846	-7.97963
ENSG00000064652	SNX24	-0.000361767	1.47141	-2.57502	0.010061	0.253846	-7.56643
ENSG00000272625	RP11-737O24.5	0.000483278	0.753437	2.57351	0.010105	0.253846	-7.48533
ENSG00000132906	CASP9	0.000286988	3.5262	2.57349	0.0101056	0.253846	-7.90401
ENSG00000110446	SLC15A3	0.000365539	5.42191	2.57315	0.0101154	0.253846	-8.09606
ENSG00000103356	EARS2	0.000201198	3.67604	2.57205	0.0101476	0.253846	-7.92738
ENSG00000026103	FAS	-0.000328672	6.28198	-2.57174	0.0101566	0.253846	-8.12275
ENSG00000171953	ATPAF2	0.000284015	3.26113	2.57156	0.0101619	0.253846	-7.86493
ENSG00000173914	RBM4B	0.000184886	3.53578	2.5715	0.0101637	0.253846	-7.90828
ENSG00000151665	PIGF	-0.000354057	3.84059	-2.5702	0.0102018	0.253846	-7.95783
ENSG00000100445	SDR39U1	0.00028365	3.97951	2.57013	0.0102039	0.253846	-7.97528
ENSG00000151623	NR3C2	0.000325899	4.87363	2.56976	0.0102148	0.253846	-8.06532
ENSG00000101888	NXT2	-0.000562383	2.93021	-2.56957	0.0102203	0.253846	-7.81437
ENSG00000106299	WASL	-0.000395658	3.37987	-2.56817	0.0102617	0.253846	-7.89248
ENSG00000100266	PACSIN2	0.000330719	7.02857	2.5679	0.0102696	0.253846	-8.13061
ENSG00000012232	EXTL3	0.00032248	5.95113	2.56765	0.0102769	0.253846	-8.12724
ENSG00000279294	RP11-274A11.3	0.000523752	1.4541	2.56739	0.0102847	0.253846	-7.5797
ENSG00000134758	RNF138	-0.000491971	4.71833	-2.56717	0.0102913	0.253846	-8.06714
ENSG00000152558	TMEM123	-0.000479013	7.97627	-2.56708	0.0102939	0.253846	-8.11523
ENSG00000262879	RP11-156P1.3	0.000291491	5.14511	2.56349	0.0104007	0.254935	-8.10538
ENSG00000184675	AMER1	0.000271347	3.114	2.5631	0.0104124	0.254935	-7.86047
ENSG00000115738	ID2	-0.000305	5.49558	-2.5629	0.0104185	0.254935	-8.12632
ENSG00000175556	LONRF3	0.00029886	2.84528	2.5617	0.0104544	0.254935	-7.81533
ENSG00000182010	RTKN2	-0.00067076	3.22832	-2.56165	0.0104558	0.254935	-7.87779
ENSG00000177879	AP3S1	-0.00038107	4.32626	-2.56114	0.0104712	0.254935	-8.04591
ENSG00000203880	PCMTD2	-0.000250672	6.16611	-2.56104	0.0104741	0.254935	-8.14912
ENSG00000086288	NME8	-0.000495204	1.89065	-2.55697	0.0105974	0.256646	-7.6742
ENSG00000151743	AMN1	-0.000357788	3.35634	-2.5567	0.0106056	0.256646	-7.91828
ENSG00000154642	C21orf91	-0.000496004	5.71882	-2.55656	0.0106099	0.256646	-8.15099
ENSG00000237541	HLA-DQA2	0.00214654	3.02252	2.55614	0.0106227	0.256646	-7.86332
ENSG00000249592	RP11-440L14.1	0.000237355	4.50054	2.5551	0.0106543	0.256938	-8.07587
ENSG00000163554	SPTA1	-0.000781265	3.92006	-2.5536	0.0107002	0.25757	-8.01168
ENSG00000135679	MDM2	-0.000301106	7.21878	-2.55096	0.0107815	0.259053	-8.17195
ENSG00000001084	GCLC	-0.000424773	4.89978	-2.54987	0.0108154	0.259343	-8.12519
ENSG00000165417	GTF2A1	-0.000390208	5.63317	-2.54919	0.0108365	0.259343	-8.16728
ENSG00000163634	THOC7	-0.000395741	3.26477	-2.54866	0.0108529	0.259343	-7.92655
ENSG00000119812	FAM98A	-0.000279057	3.63557	-2.54792	0.0108757	0.259416	-7.98296
ENSG00000139517	LNX2	-0.000269085	3.96046	-2.54659	0.0109173	0.259715	-8.03636
ENSG00000114648	KLHL18	0.000202534	4.98237	2.54569	0.0109454	0.259715	-8.14245
ENSG00000161204	ABCF3	0.000262734	4.62335	2.54537	0.0109556	0.259715	-8.11302
ENSG00000149231	CCDC82	-0.000467021	5.62411	-2.54487	0.0109712	0.259715	-8.17717
ENSG00000113716	HMGXB3	0.000227262	4.97214	2.54436	0.0109872	0.259715	-8.14341
ENSG00000119782	FKBP1B	-0.000688887	1.60459	-2.54336	0.0110185	0.259985	-7.66032
ENSG00000213694	S1PR3	0.000391787	3.80974	2.54244	0.0110474	0.2602	-8.03252
ENSG00000136999	NOV	0.000561515	3.38702	2.53874	0.0111649	0.26249	-7.96396
ENSG00000013561	RNF14	-0.000475456	6.05699	-2.53789	0.011192	0.26249	-8.2063
ENSG00000173852	DPY19L1	-0.000347477	4.24608	-2.53525	0.0112765	0.26249	-8.10087
ENSG00000163412	EIF4E3	-0.000384712	7.46558	-2.5346	0.0112976	0.26249	-8.20955
ENSG00000218739	CEBPZOS	-0.000388896	3.52646	-2.53413	0.0113126	0.26249	-8.00361
ENSG00000103510	KAT8	0.0002414	5.45579	2.53327	0.0113402	0.26249	-8.20093
ENSG00000101928	MOSPD1	-0.000467886	3.0555	-2.53295	0.0113506	0.26249	-7.92627
ENSG00000138346	DNA2	-0.000457537	3.2103	-2.53266	0.0113599	0.26249	-7.95476
ENSG00000130164	LDLR	-0.000511707	2.73113	-2.53155	0.011396	0.26249	-7.87572
ENSG00000160714	UBE2Q1	0.000180858	5.45579	2.53146	0.0113989	0.26249	-8.20535
ENSG00000122958	VPS26A	-0.000365817	4.62324	-2.53144	0.0113995	0.26249	-8.14958
ENSG00000154589	LY96	-0.000663799	2.71056	-2.53139	0.0114012	0.26249	-7.88341
ENSG00000171848	RRM2	-0.000602511	1.82924	-2.53128	0.0114048	0.26249	-7.73626
ENSG00000280106	CTC-523E23.3	-0.000729378	1.37566	-2.52934	0.011468	0.262515	-7.66906
ENSG00000135048	TMEM2	0.000219302	7.18554	2.5287	0.0114889	0.262515	-8.22927
ENSG00000169877	AHSP	-0.00108413	4.58114	-2.5285	0.0114952	0.262515	-8.1513
ENSG00000197912	SPG7	0.000281077	6.40085	2.52823	0.011504	0.262515	-8.23422
ENSG00000139190	VAMP1	0.000275537	4.59003	2.52818	0.0115059	0.262515	-8.15365
ENSG00000172349	IL16	0.000176904	8.93157	2.5238	0.0116499	0.264015	-8.19727
ENSG00000176444	CLK2	0.000190318	4.71898	2.52377	0.011651	0.264015	-8.17699
ENSG00000173409	ARV1	-0.000386214	2.13063	-2.5236	0.0116564	0.264015	-7.79772
ENSG00000164120	HPGD	-0.000631679	2.09518	-2.52213	0.0117053	0.264015	-7.80002
ENSG00000185986	SDHAP3	0.000305721	2.8335	2.52085	0.011748	0.264015	-7.92285
ENSG00000119599	DCAF4	0.000328374	2.35392	2.52025	0.0117679	0.264015	-7.8389
ENSG00000162722	TRIM58	-0.000894286	7.70418	-2.51971	0.011786	0.264015	-8.24153
ENSG00000168439	STIP1	0.000232974	5.41191	2.5197	0.0117861	0.264015	-8.23179
ENSG00000104320	NBN	-0.000365097	6.59059	-2.51935	0.0117978	0.264015	-8.25713
ENSG00000174021	GNG5	-0.000327987	4.59422	-2.51889	0.0118134	0.264015	-8.17955
ENSG00000144306	SCRN3	-0.000292056	3.36676	-2.51881	0.0118161	0.264015	-8.01654
ENSG00000156136	DCK	-0.000340361	5.85182	-2.51868	0.0118205	0.264015	-8.25032
ENSG00000115232	ITGA4	-0.000315541	8.61241	-2.518	0.0118431	0.264015	-8.22196
ENSG00000001561	ENPP4	-0.000516141	4.36669	-2.5177	0.0118534	0.264015	-8.15438
ENSG00000109906	ZBTB16	0.000540185	3.73217	2.51692	0.0118794	0.264145	-8.07835
ENSG00000100294	MCAT	0.000439012	1.65122	2.51517	0.0119383	0.264795	-7.74152
ENSG00000108370	RGS9	-0.00060832	1.32562	-2.51486	0.011949	0.264795	-7.69871
ENSG00000226266	AC009961.3	-0.000335735	1.61842	-2.51336	0.0119997	0.265472	-7.7413
ENSG00000161526	SAP30BP	0.000207157	5.59499	2.51174	0.0120548	0.265883	-8.2605
ENSG00000150681	RGS18	-0.000556362	6.97041	-2.51081	0.0120866	0.265883	-8.27613
ENSG00000231365	RP11-418J17.1	0.000328934	3.54145	2.51046	0.0120985	0.265883	-8.06227
ENSG00000164611	PTTG1	-0.000440476	1.69574	-2.51019	0.0121078	0.265883	-7.76528
ENSG00000105369	CD79A	0.000809007	2.78338	2.50974	0.0121233	0.265883	-7.94216
ENSG00000152620	NADK2	-0.000348953	3.30636	-2.50925	0.01214	0.265883	-8.03016
ENSG00000111237	VPS29	-0.000377136	5.02591	-2.50773	0.0121923	0.266585	-8.24191
ENSG00000109787	KLF3	-0.000266762	7.77008	-2.50652	0.0122342	0.266863	-8.27408
ENSG00000151553	FAM160B1	-0.000347805	5.97877	-2.50618	0.0122457	0.266863	-8.28508
ENSG00000103342	GSPT1	-0.000661556	8.65176	-2.50482	0.0122929	0.267446	-8.25374
ENSG00000152332	UHMK1	-0.000329668	7.80357	-2.50397	0.0123226	0.267648	-8.2794
ENSG00000140398	NEIL1	0.000534002	2.24261	2.50232	0.0123798	0.268448	-7.86068
ENSG00000137414	FAM8A1	-0.000389849	7.04075	-2.50049	0.0124439	0.269392	-8.30136
ENSG00000250506	CDK3	0.000949143	1.09704	2.49879	0.0125036	0.269795	-7.70663
ENSG00000122741	DCAF10	-0.000260027	5.527	-2.49879	0.0125037	0.269795	-8.2907
ENSG00000128908	INO80	0.000147607	5.51265	2.49708	0.0125643	0.270658	-8.29304
ENSG00000272563	RP11-480C16.1	-0.000635368	1.06686	-2.49589	0.0126062	0.271117	-7.7127
ENSG00000119636	CCDC176	-0.000762372	4.08628	-2.4942	0.0126665	0.271414	-8.18248
ENSG00000177370	TIMM22	0.000254878	3.38389	2.49315	0.0127037	0.271414	-8.08162
ENSG00000177479	ARIH2	0.000124036	6.20297	2.49294	0.0127112	0.271414	-8.32109
ENSG00000006194	ZNF263	0.000191593	4.97756	2.49281	0.012716	0.271414	-8.27341
ENSG00000162980	ARL5A	-0.000449838	5.75744	-2.4926	0.0127235	0.271414	-8.31296
ENSG00000243335	KCTD7	0.000192115	5.24235	2.48966	0.0128289	0.271721	-8.29715
ENSG00000236670	KRT18P5	0.000450902	1.27857	2.48836	0.012876	0.271721	-7.75664
ENSG00000164096	C4orf3	-0.000343176	6.14714	-2.48724	0.0129166	0.271721	-8.33518
ENSG00000011275	RNF216	0.000165399	6.07661	2.48709	0.0129218	0.271721	-8.33408
ENSG00000136048	DRAM1	-0.000273015	3.82456	-2.48668	0.0129369	0.271721	-8.1703
ENSG00000147853	AK3	-0.000284533	4.3208	-2.48665	0.0129379	0.271721	-8.22809
ENSG00000112312	GMNN	-0.000484096	0.955381	-2.48659	0.0129401	0.271721	-7.72348
ENSG00000132275	RRP8	0.000152933	4.62269	2.48656	0.0129412	0.271721	-8.26029
ENSG00000162222	TTC9C	0.000175689	3.76561	2.48649	0.0129438	0.271721	-8.1595
ENSG00000130227	XPO7	-0.000423665	6.84553	-2.48645	0.012945	0.271721	-8.33806
ENSG00000110422	HIPK3	-0.000271965	8.33378	-2.48382	0.013041	0.273299	-8.31491
ENSG00000101407	TTI1	0.000162344	4.79427	2.4821	0.013104	0.273304	-8.2866
ENSG00000130254	SAFB2	0.000164175	6.20266	2.48198	0.0131083	0.273304	-8.34868
ENSG00000101158	NELFCD	0.000184238	4.75653	2.48126	0.013135	0.273304	-8.28506
ENSG00000126775	ATG14	-0.0002113	4.72597	-2.48106	0.0131422	0.273304	-8.28348
ENSG00000064763	FAR2	-0.000312706	5.19824	-2.48097	0.0131454	0.273304	-8.31853
ENSG00000165997	ARL5B	-0.000531082	4.9506	-2.47929	0.0132074	0.273636	-8.30589
ENSG00000175105	ZNF654	-0.000440521	5.42532	-2.47902	0.0132176	0.273636	-8.33475
ENSG00000163605	PPP4R2	-0.000424203	6.45373	-2.47885	0.013224	0.273636	-8.35816
ENSG00000241666	RP3-455J7.4	0.000484072	0.714449	2.47786	0.0132607	0.273963	-7.72631
ENSG00000181191	PJA1	0.000261078	3.51186	2.47706	0.0132903	0.27406	-8.14005
ENSG00000185418	TARSL2	0.000223283	4.24101	2.47622	0.0133215	0.27406	-8.24381
ENSG00000151490	PTPRO	-0.000350814	4.01084	-2.47604	0.013328	0.27406	-8.21961
ENSG00000185630	PBX1	-0.000717588	2.95838	-2.47435	0.0133912	0.274928	-8.05748
ENSG00000276293	PIP4K2B	0.000152245	5.65304	2.47326	0.0134321	0.274939	-8.35745
ENSG00000013583	HEBP1	-0.000629953	1.62896	-2.47322	0.0134336	0.274939	-7.84213
ENSG00000154736	ADAMTS5	0.000690833	1.24509	2.47166	0.0134923	0.275526	-7.79645
ENSG00000135272	MDFIC	-0.000348277	5.93513	-2.47134	0.0135043	0.275526	-8.36889
ENSG00000131725	WDR44	-0.000212216	4.172	-2.46825	0.0136213	0.276842	-8.25838
ENSG00000073737	DHRS9	-0.000515942	4.64858	-2.46787	0.0136357	0.276842	-8.30654
ENSG00000055332	EIF2AK2	-0.000558922	6.29181	-2.46741	0.0136531	0.276842	-8.38536
ENSG00000135018	UBQLN1	-0.00021346	7.14467	-2.46741	0.0136532	0.276842	-8.38234
ENSG00000133316	WDR74	0.000332908	3.56009	2.46478	0.0137539	0.278452	-8.18092
ENSG00000011376	LARS2	0.000153134	4.49543	2.46422	0.0137753	0.278456	-8.30254
ENSG00000102743	SLC25A15	-0.000248235	2.9286	-2.46242	0.0138444	0.278501	-8.0824
ENSG00000122783	C7orf49	0.000182458	4.27038	2.46224	0.0138514	0.278501	-8.28548
ENSG00000102753	KPNA3	-0.000320932	4.54506	-2.46212	0.0138558	0.278501	-8.31486
ENSG00000110777	POU2AF1	0.000606835	2.13799	2.46126	0.0138893	0.278501	-7.96027
ENSG00000119682	AREL1	0.000179991	6.93176	2.46122	0.0138908	0.278501	-8.39982
ENSG00000133106	EPSTI1	-0.000721117	5.25181	-2.46084	0.0139052	0.278501	-8.36798
ENSG00000126749	EMG1	0.000210608	4.66475	2.46031	0.0139261	0.278501	-8.32797
ENSG00000060140	STYK1	-0.000690367	0.907167	-2.45916	0.0139704	0.278962	-7.78949
ENSG00000125633	CCDC93	0.000132832	6.51824	2.45749	0.0140357	0.27932	-8.41084
ENSG00000198554	WDHD1	-0.000367098	2.37885	-2.45732	0.0140423	0.27932	-8.00166
ENSG00000115944	COX7A2L	-0.000278578	5.16343	-2.45603	0.0140926	0.27932	-8.37874
ENSG00000132964	CDK8	-0.000282967	3.48575	-2.45562	0.0141088	0.27932	-8.19326
ENSG00000156026	MCU	-0.000204496	4.20128	-2.45558	0.0141103	0.27932	-8.29532
ENSG00000171453	POLR1C	0.00024002	3.27301	2.45507	0.0141301	0.27932	-8.15765
ENSG00000278948	RP5-1039K5.12	0.00043756	0.813116	2.45455	0.0141506	0.27932	-7.78516
ENSG00000197969	VPS13A	-0.000357638	6.92389	-2.45406	0.0141701	0.27932	-8.41687
ENSG00000157734	SNX22	0.000550034	3.53617	2.45381	0.01418	0.27932	-8.20044
ENSG00000137965	IFI44	-0.000914373	4.48069	-2.45166	0.0142645	0.280498	-8.33252
ENSG00000095585	BLNK	0.000517393	2.98729	2.45121	0.0142825	0.280498	-8.1211
ENSG00000134321	RSAD2	-0.001171	5.27673	-2.44973	0.0143412	0.281228	-8.39387
ENSG00000181754	AMIGO1	0.000368779	3.1386	2.44787	0.0144154	0.282263	-8.15249
ENSG00000278730	RP11-147L13.11	0.000197631	5.25428	2.44691	0.0144536	0.282589	-8.40446
ENSG00000277147	LINC00869	-0.000339169	4.79407	-2.44592	0.0144935	0.282946	-8.37519
ENSG00000259768	RP5-991G20.1	0.000432962	0.979181	2.445	0.0145304	0.283131	-7.83073
ENSG00000135845	PIGC	-0.000456813	5.21925	-2.44461	0.0145461	0.283131	-8.40719
ENSG00000148814	LRRC27	0.000307558	1.99545	2.44284	0.0146176	0.283833	-7.97428
ENSG00000100296	THOC5	0.000210409	5.46421	2.44264	0.0146255	0.283833	-8.42573
ENSG00000165526	RPUSD4	0.00020076	3.97311	2.44188	0.0146564	0.283908	-8.29695
ENSG00000197601	FAR1	-0.000390833	7.06152	-2.44148	0.0146726	0.283908	-8.4468
ENSG00000111911	HINT3	-0.000338928	4.12891	-2.44019	0.0147249	0.284098	-8.32478
ENSG00000108474	PIGL	0.000230197	3.54748	2.44017	0.0147257	0.284098	-8.2383
ENSG00000134970	TMED7	-0.000512546	5.89945	-2.43962	0.0147483	0.284116	-8.44791
ENSG00000138303	ASCC1	0.000240255	2.83818	2.43846	0.0147954	0.284266	-8.12538
ENSG00000147996	CBWD5	-0.000387522	5.5668	-2.43773	0.0148254	0.284266	-8.44246
ENSG00000153006	SREK1IP1	-0.000369647	4.65505	-2.43761	0.0148301	0.284266	-8.38439
ENSG00000242294	STAG3L5P	0.000290497	3.74415	2.43721	0.0148468	0.284266	-8.27554
ENSG00000166128	RAB8B	-0.000421184	7.49146	-2.43678	0.0148644	0.284266	-8.45187
ENSG00000137804	NUSAP1	-0.00060926	3.2206	-2.43621	0.0148879	0.284301	-8.20053
ENSG00000180233	ZNRF2	-0.000308769	5.12364	-2.43491	0.0149411	0.284902	-8.42738
ENSG00000134308	YWHAQ	-0.000262412	6.26392	-2.4337	0.0149914	0.285446	-8.46698
ENSG00000184083	FAM120C	0.000257461	2.82696	2.43174	0.0150725	0.286574	-8.13892
ENSG00000152778	IFIT5	-0.000552045	5.88931	-2.42951	0.0151655	0.287444	-8.47189
ENSG00000165480	SKA3	-0.000694543	2.21414	-2.42908	0.0151833	0.287444	-8.04326
ENSG00000147454	SLC25A37	-0.000554297	10.9207	-2.42906	0.015184	0.287444	-8.35738
ENSG00000065613	SLK	-0.000306255	7.0299	-2.42831	0.0152157	0.28763	-8.47941
ENSG00000007202	KIAA0100	0.000173501	7.33771	2.4267	0.015283	0.288486	-8.47907
ENSG00000173548	SNX33	0.000372949	2.31038	2.42266	0.0154538	0.291073	-8.0751
ENSG00000139970	RTN1	0.000380293	4.06952	2.42241	0.0154644	0.291073	-8.35992
ENSG00000143457	GOLPH3L	-0.000248788	4.00001	-2.42029	0.0155547	0.292085	-8.3521
ENSG00000260228	RP11-483P21.2	0.000389622	1.56458	2.4201	0.0155627	0.292085	-7.96575
ENSG00000147457	CHMP7	0.000239244	6.38264	2.41894	0.0156126	0.292246	-8.50308
ENSG00000137942	FNBP1L	-0.000407658	2.91676	-2.41886	0.0156159	0.292246	-8.19014
ENSG00000137692	DCUN1D5	-0.000353197	3.93145	-2.41726	0.0156849	0.292358	-8.3506
ENSG00000100836	PABPN1	0.000183434	5.50726	2.41679	0.015705	0.292358	-8.49086
ENSG00000004866	ST7	-0.000291396	2.49321	-2.41621	0.0157298	0.292358	-8.11867
ENSG00000156787	TBC1D31	-0.000352332	4.98881	-2.41535	0.0157671	0.292358	-8.46405
ENSG00000114737	CISH	-0.000413913	4.6933	-2.41445	0.015806	0.292358	-8.4414
ENSG00000073464	CLCN4	0.000559546	3.50028	2.41406	0.015823	0.292358	-8.29282
ENSG00000153574	RPIA	-0.000577348	5.50979	-2.41242	0.0158939	0.292358	-8.50084
ENSG00000088876	ZNF343	0.000197532	3.28989	2.41237	0.0158961	0.292358	-8.26433
ENSG00000232653	GOLGA8N	-0.00047937	4.10991	-2.41227	0.0159006	0.292358	-8.38442
ENSG00000166471	TMEM41B	-0.000370697	4.40497	-2.41223	0.0159025	0.292358	-8.42158
ENSG00000086065	CHMP5	-0.000521988	4.14199	-2.4121	0.0159079	0.292358	-8.39676
ENSG00000095574	IKZF5	-0.000413084	4.40837	-2.41204	0.0159108	0.292358	-8.4223
ENSG00000178074	C2orf69	-0.000401004	3.27856	-2.4114	0.0159384	0.292358	-8.26714
ENSG00000187801	ZFP69B	-0.000354386	1.16293	-2.41051	0.0159773	0.292358	-7.93192
ENSG00000267731	RP11-147L13.8	-0.000602308	2.68015	-2.40977	0.0160097	0.292358	-8.16772
ENSG00000236810	TCEB3-AS1	0.000346382	1.08629	2.40968	0.0160138	0.292358	-7.92395
ENSG00000077157	PPP1R12B	0.000361568	6.86202	2.40956	0.0160191	0.292358	-8.52478
ENSG00000155666	KDM8	0.00038235	2.23753	2.40947	0.016023	0.292358	-8.09163
ENSG00000175711	B3GNTL1	0.000427672	3.84453	2.40781	0.0160961	0.293284	-8.3638
ENSG00000215630	GUSBP9	0.000670477	3.00953	2.40487	0.0162257	0.295093	-8.23439
ENSG00000204315	FKBPL	0.000466004	0.584731	2.40454	0.0162404	0.295093	-7.88717
ENSG00000083937	CHMP2B	-0.000384836	4.69191	-2.40396	0.0162664	0.295157	-8.47041
ENSG00000118689	FOXO3	-0.00051448	8.03001	-2.40311	0.0163039	0.295184	-8.52022
ENSG00000110852	CLEC2B	-0.000478693	5.35357	-2.40185	0.0163603	0.295184	-8.5193
ENSG00000132274	TRIM22	-0.000364175	8.41069	-2.40129	0.0163853	0.295184	-8.51444
ENSG00000129187	DCTD	0.000148789	4.40008	2.40103	0.0163968	0.295184	-8.44719
ENSG00000233024	RP11-1212A22.4	0.00136079	1.52313	2.40062	0.0164153	0.295184	-8.0059
ENSG00000156970	BUB1B	-0.00054285	0.809323	-2.40041	0.0164245	0.295184	-7.91894
ENSG00000118193	KIF14	-0.000608144	1.91595	-2.3998	0.0164521	0.295184	-8.06867
ENSG00000162139	NEU3	0.000231067	4.14114	2.39932	0.0164735	0.295184	-8.42238
ENSG00000108963	DPH1	0.000302313	3.00124	2.39929	0.0164749	0.295184	-8.2473
ENSG00000146409	SLC18B1	-0.000308555	4.01154	-2.39879	0.0164974	0.295184	-8.40803
ENSG00000100422	CERK	0.000210636	6.77826	2.39825	0.0165217	0.295184	-8.55383
ENSG00000111602	TIMELESS	0.00030098	2.75579	2.39789	0.0165379	0.295184	-8.2082
ENSG00000175548	ALG10B	-0.000485934	4.03829	-2.39707	0.016575	0.295444	-8.41291
ENSG00000164329	PAPD4	-0.000214948	6.43835	-2.39625	0.016612	0.295557	-8.55925
ENSG00000205413	SAMD9	-0.000612235	7.84742	-2.39579	0.0166325	0.295557	-8.54306
ENSG00000135363	LMO2	-0.000232789	5.38658	-2.39543	0.0166489	0.295557	-8.53713
ENSG00000140280	LYSMD2	-0.000314467	3.96853	-2.39411	0.016709	0.295897	-8.41206
ENSG00000166479	TMX3	-0.00041669	5.77868	-2.39402	0.0167131	0.295897	-8.55422
ENSG00000176105	YES1	-0.00039304	2.76529	-2.39335	0.0167434	0.296033	-8.22051
ENSG00000165516	KLHDC2	-0.000257688	5.21873	-2.39164	0.0168215	0.296138	-8.53686
ENSG00000204899	MZT1	-0.000571594	2.0858	-2.3907	0.0168645	0.296138	-8.11508
ENSG00000213090	AC007256.5	-0.000429219	2.6681	-2.3906	0.0168694	0.296138	-8.20808
ENSG00000172493	AFF1	-0.000326966	6.97516	-2.39026	0.0168848	0.296138	-8.57156
ENSG00000111962	UST	0.000338821	2.62508	2.39007	0.0168934	0.296138	-8.20816
ENSG00000138190	EXOC6	-0.000319866	5.51334	-2.38989	0.0169017	0.296138	-8.55554
ENSG00000186908	ZDHHC17	-0.00035229	6.33737	-2.38977	0.0169073	0.296138	-8.5742
ENSG00000154451	GBP5	-0.000515738	8.56964	-2.38927	0.0169304	0.296147	-8.53978
ENSG00000179562	GCC1	0.000192508	5.70303	2.38833	0.0169738	0.29651	-8.56638
ENSG00000120063	GNA13	-0.000315209	7.93176	-2.38772	0.0170021	0.29661	-8.56036
ENSG00000073849	ST6GAL1	0.000195347	6.83841	2.3867	0.0170491	0.297034	-8.58022
ENSG00000122952	ZWINT	-0.000515923	0.735601	-2.38556	0.017102	0.297147	-7.94648
ENSG00000144451	SPAG16	-0.000481308	0.876587	-2.38534	0.0171122	0.297147	-7.96571
ENSG00000261366	MANEA-AS1	-0.000623298	2.27256	-2.3851	0.0171235	0.297147	-8.15915
ENSG00000164031	DNAJB14	-0.000482658	6.60392	-2.38276	0.0172324	0.297975	-8.59132
ENSG00000139354	GAS2L3	-0.000512502	0.999749	-2.38273	0.0172339	0.297975	-7.98087
ENSG00000144749	LRIG1	0.00026036	4.75048	2.38261	0.0172393	0.297975	-8.5214
ENSG00000116133	DHCR24	-0.000528204	1.68535	-2.38182	0.0172763	0.29822	-8.07427
ENSG00000179387	ELMOD2	-0.000473563	4.94969	-2.37906	0.0174062	0.299454	-8.54989
ENSG00000246790	RP11-730K11.1	0.000395238	3.24293	2.37904	0.0174069	0.299454	-8.33346
ENSG00000166261	ZNF202	0.000182047	3.83029	2.37839	0.0174374	0.299454	-8.42849
ENSG00000147036	LANCL3	-0.000485031	1.78368	-2.37836	0.0174391	0.299454	-8.09385
ENSG00000173933	RBM4	9.53574e-05	6.31002	2.37678	0.0175137	0.300342	-8.60474
ENSG00000266412	NCOA4	-0.000443225	10.4587	-2.37546	0.0175764	0.301024	-8.50611
ENSG00000261997	RP11-212I21.4	-0.000527127	3.75085	-2.37296	0.0176955	0.302669	-8.43326
ENSG00000156876	SASS6	-0.000401082	2.46706	-2.3716	0.017761	0.303394	-8.22292
ENSG00000258634	RP4-773N10.4	0.00027535	2.77766	2.37093	0.017793	0.303545	-8.27556
ENSG00000068796	KIF2A	-0.000310351	6.94357	-2.37026	0.0178252	0.3037	-8.61903
ENSG00000271699	SNX29P2	0.000614307	2.17635	2.36807	0.017931	0.305107	-8.18163
ENSG00000214595	EML6	0.000549905	1.72246	2.36726	0.0179703	0.305378	-8.12119
ENSG00000147138	GPR174	-0.000312521	6.22996	-2.36531	0.0180649	0.306589	-8.62834
ENSG00000078596	ITM2A	-0.000437045	4.73681	-2.36298	0.0181786	0.3074	-8.56491
ENSG00000239961	LILRA4	0.000703293	1.23587	2.36279	0.0181881	0.3074	-8.05432
ENSG00000114784	EIF1B	-0.000343962	4.41054	-2.36234	0.0182102	0.3074	-8.54195
ENSG00000100129	EIF3L	0.000233007	7.78816	2.36063	0.0182945	0.3074	-8.62799
ENSG00000169679	BUB1	-0.000462352	1.91342	-2.36052	0.0182997	0.3074	-8.16239
ENSG00000092140	G2E3	-0.000388381	4.71763	-2.36033	0.0183091	0.3074	-8.57471
ENSG00000102471	NDFIP2	-0.000495366	1.81092	-2.35964	0.018343	0.3074	-8.14645
ENSG00000120942	UBIAD1	0.000241166	3.90563	2.35962	0.0183441	0.3074	-8.48313
ENSG00000104522	TSTA3	-0.000718797	4.82488	-2.35884	0.0183827	0.3074	-8.58772
ENSG00000100100	PIK3IP1	0.00030635	6.92927	2.35872	0.0183883	0.3074	-8.64594
ENSG00000155097	ATP6V1C1	-0.000261017	5.61263	-2.35858	0.0183954	0.3074	-8.63392
ENSG00000198898	CAPZA2	-0.000477248	6.75956	-2.35857	0.018396	0.3074	-8.64792
ENSG00000137198	GMPR	-0.00080202	5.91841	-2.35761	0.0184437	0.3074	-8.64247
ENSG00000011007	TCEB3	0.000156738	4.77735	2.35705	0.0184715	0.3074	-8.58845
ENSG00000185670	ZBTB3	0.000292363	2.78608	2.35703	0.0184723	0.3074	-8.31069
ENSG00000143869	GDF7	0.000882103	1.26036	2.35672	0.0184876	0.3074	-8.08743
ENSG00000198932	GPRASP1	0.00032079	4.92544	2.35526	0.0185606	0.308223	-8.59721
ENSG00000160352	ZNF714	-0.000367397	3.78717	-2.35469	0.0185891	0.308255	-8.48006
ENSG00000189152	GRAPL	0.000513665	2.71262	2.35428	0.0186095	0.308255	-8.30348
ENSG00000134489	HRH4	-0.000505153	2.99787	-2.35276	0.0186855	0.308707	-8.36782
ENSG00000085978	ATG16L1	0.000132755	5.45706	2.35252	0.0186973	0.308707	-8.64026
ENSG00000094975	SUCO	-0.000288205	5.99122	-2.35232	0.0187074	0.308707	-8.65864
ENSG00000134265	NAPG	-0.000267203	4.88092	-2.35089	0.0187792	0.309459	-8.61168
ENSG00000259865	RP11-488L18.10	-0.000869976	1.58333	-2.35048	0.0188001	0.309459	-8.13448
ENSG00000184182	UBE2F	-0.000274588	5.07015	-2.34836	0.0189074	0.310834	-8.63055
ENSG00000198502	HLA-DRB5	0.000733764	6.06632	2.3476	0.0189458	0.310968	-8.66948
ENSG00000153130	SCOC	-0.000614933	2.87138	-2.34727	0.0189629	0.310968	-8.35455
ENSG00000179299	NSUN7	-0.000454343	2.71475	-2.34676	0.0189887	0.311003	-8.33189
ENSG00000023734	STRAP	-0.000357455	3.28663	-2.34537	0.0190596	0.311607	-8.42645
ENSG00000116478	HDAC1	0.000155938	6.44442	2.3451	0.0190731	0.311607	-8.67999
ENSG00000124177	CHD6	0.000148595	6.6723	2.34349	0.0191556	0.312566	-8.6833
ENSG00000161267	BDH1	0.000338495	2.86712	2.34197	0.0192336	0.313132	-8.35775
ENSG00000186132	C2orf76	-0.000420073	0.934905	-2.34188	0.0192381	0.313132	-8.06921
ENSG00000142230	SAE1	0.000195979	4.78137	2.34098	0.0192845	0.313499	-8.62492
ENSG00000149474	CSRP2BP	0.000178756	4.35581	2.33799	0.0194396	0.315338	-8.59001
ENSG00000102226	USP11	0.000344934	3.10329	2.33787	0.0194457	0.315338	-8.40739
ENSG00000143476	DTL	-0.000563091	0.966023	-2.33632	0.0195262	0.316253	-8.08727
ENSG00000135315	CEP162	-0.00033002	4.00648	-2.33575	0.0195563	0.316349	-8.55641
ENSG00000164649	CDCA7L	0.000386553	4.18521	2.3346	0.0196162	0.316887	-8.57715
ENSG00000176681	LRRC37A	0.00072332	3.65939	2.33419	0.0196379	0.316887	-8.5037
ENSG00000085365	SCAMP1	-0.000404705	5.02567	-2.33259	0.0197217	0.317411	-8.66401
ENSG00000062716	VMP1	-0.000212546	8.56298	-2.33231	0.0197362	0.317411	-8.67235
ENSG00000139163	ETNK1	-0.000379048	6.77651	-2.33202	0.0197517	0.317411	-8.7101
ENSG00000141543	EIF4A3	0.000224109	5.11593	2.33173	0.0197671	0.317411	-8.67189
ENSG00000255302	EID1	-0.000405403	5.5371	-2.33053	0.0198305	0.31804	-8.69641
ENSG00000166707	ZCCHC18	0.000421685	1.21071	2.32831	0.0199478	0.319151	-8.13729
ENSG00000179051	RCC2	0.000229274	5.69916	2.3283	0.0199485	0.319151	-8.70678
ENSG00000151611	MMAA	-0.000273586	3.02391	-2.32693	0.0200211	0.319535	-8.42111
ENSG00000170385	SLC30A1	-0.000428768	5.25757	-2.32693	0.0200212	0.319535	-8.69166
ENSG00000185947	ZNF267	-0.000413949	6.31285	-2.32607	0.0200674	0.319883	-8.72387
ENSG00000087589	CASS4	0.000289794	5.49426	2.32444	0.0201546	0.320883	-8.70643
ENSG00000213380	COG8	0.000182454	4.98641	2.32239	0.0202648	0.322248	-8.68431
ENSG00000184898	RBM43	-0.00035214	3.61546	-2.32114	0.0203323	0.322929	-8.5325
ENSG00000145685	LHFPL2	-0.000362026	4.24781	-2.31975	0.0204072	0.323727	-8.62196
ENSG00000087053	MTMR2	-0.000270611	4.07847	-2.3171	0.0205514	0.325354	-8.60552
ENSG00000162909	CAPN2	-0.000154248	7.36202	-2.31621	0.0206	0.325354	-8.74028
ENSG00000213903	LTB4R	0.000293218	5.41563	2.31605	0.0206086	0.325354	-8.72219
ENSG00000171552	BCL2L1	-0.000754108	8.51014	-2.316	0.0206115	0.325354	-8.71307
ENSG00000070495	JMJD6	0.000186029	4.58076	2.31476	0.0206794	0.325354	-8.67034
ENSG00000138119	MYOF	-0.000436706	4.46762	-2.3141	0.0207153	0.325354	-8.65778
ENSG00000134851	TMEM165	-0.000218194	5.64997	-2.31391	0.0207259	0.325354	-8.7396
ENSG00000197417	SHPK	0.000287333	3.1136	2.31357	0.0207447	0.325354	-8.46891
ENSG00000115415	STAT1	-0.000380688	8.84385	-2.31344	0.0207518	0.325354	-8.70857
ENSG00000116747	TROVE2	-0.000363147	6.58693	-2.31297	0.0207773	0.325354	-8.7551
ENSG00000178104	PDE4DIP	0.000183019	5.82041	2.31288	0.0207826	0.325354	-8.74452
ENSG00000164663	USP49	-0.000220632	3.5032	-2.31191	0.0208357	0.32564	-8.5394
ENSG00000112039	FANCE	0.000319686	2.07683	2.30976	0.0209547	0.32564	-8.30106
ENSG00000251600	RP11-673E1.1	0.000609241	0.760682	2.30937	0.0209766	0.32564	-8.1261
ENSG00000189136	UBE2Q2P1	-0.000436202	0.798183	-2.30921	0.0209857	0.32564	-8.13471
ENSG00000111752	PHC1	0.000268951	3.87869	2.30908	0.0209924	0.32564	-8.59751
ENSG00000152926	ZNF117	-0.000526741	6.47968	-2.30899	0.0209975	0.32564	-8.76331
ENSG00000174306	ZHX3	0.00025714	3.00782	2.3086	0.0210193	0.32564	-8.46072
ENSG00000174243	DDX23	0.000205707	6.54209	2.30843	0.0210287	0.32564	-8.76554
ENSG00000196743	GM2A	0.000350499	5.49884	2.3077	0.0210696	0.32564	-8.74813
ENSG00000029534	ANK1	-0.000806801	6.0553	-2.30695	0.0211109	0.32564	-8.7628
ENSG00000158769	F11R	0.000274592	5.88624	2.306	0.0211645	0.32564	-8.76287
ENSG00000118690	ARMC2	-0.000274906	2.80565	-2.30586	0.0211723	0.32564	-8.43076
ENSG00000181982	CCDC149	0.000307806	2.80162	2.30552	0.0211914	0.32564	-8.44135
ENSG00000262265	RP5-867C24.4	-0.000466093	0.946388	-2.30546	0.0211944	0.32564	-8.15269
ENSG00000223482	NUTM2A-AS1	-0.000426444	6.07008	-2.30491	0.0212251	0.32564	-8.77009
ENSG00000112077	RHAG	-0.000734722	1.48891	-2.30488	0.0212271	0.32564	-8.22607
ENSG00000143367	TUFT1	0.000362916	1.79689	2.30467	0.0212387	0.32564	-8.26446
ENSG00000287100		-0.000519773	0.651147	-2.3045	0.0212485	0.32564	-8.12696
ENSG00000288398		0.00043909	0.914378	2.30407	0.0212725	0.32564	-8.15461
ENSG00000139508	SLC46A3	-0.000226321	4.51423	-2.30321	0.0213209	0.325917	-8.69019
ENSG00000140391	TSPAN3	0.000287997	4.49749	2.30287	0.0213402	0.325917	-8.68713
ENSG00000091262	ABCC6	0.000548395	0.807494	2.30192	0.0213935	0.326351	-8.16053
ENSG00000067955	CBFB	-0.000293825	5.58835	-2.30089	0.0214519	0.326862	-8.76631
ENSG00000279361	RP11-360N9.3	0.00037547	1.4963	2.29996	0.0215044	0.32728	-8.23441
ENSG00000108039	XPNPEP1	0.000152568	5.48023	2.29773	0.0216313	0.328831	-8.76867
ENSG00000077721	UBE2A	-0.000258933	4.53072	-2.29609	0.0217251	0.3297	-8.70863
ENSG00000088179	PTPN4	-0.000324606	7.36104	-2.2956	0.0217532	0.3297	-8.78775
ENSG00000157625	TAB3	-0.000251041	5.70576	-2.29534	0.021768	0.3297	-8.78388
ENSG00000070367	EXOC5	-0.000367856	6.00067	-2.29497	0.021789	0.3297	-8.79167
ENSG00000155959	VBP1	-0.000485785	3.90684	-2.29432	0.0218266	0.329889	-8.64152
ENSG00000100220	RTCB	0.000212157	4.99037	2.29355	0.0218708	0.329941	-8.75161
ENSG00000026751	SLAMF7	-0.000370483	5.29656	-2.29284	0.0219117	0.329941	-8.76909
ENSG00000170468	C14orf169	0.000280243	3.83247	2.29265	0.0219226	0.329941	-8.62969
ENSG00000163516	ANKZF1	0.000176084	5.82299	2.29251	0.0219307	0.329941	-8.79301
ENSG00000225783	MIAT	-0.000357753	7.28211	-2.29143	0.0219933	0.330137	-8.79755
ENSG00000196914	ARHGEF12	-0.000574287	7.14102	-2.29057	0.0220426	0.330137	-8.80208
ENSG00000173208	ABCD2	-0.000370892	5.28416	-2.29055	0.0220439	0.330137	-8.77168
ENSG00000256667	KLRAP1	-0.000634859	2.46674	-2.29015	0.022067	0.330137	-8.41016
ENSG00000122085	MTERF4	0.000196282	5.49384	2.28938	0.0221119	0.330137	-8.787
ENSG00000173597	SULT1B1	-0.000475696	6.39662	-2.28926	0.022119	0.330137	-8.80681
ENSG00000273284	RP11-888D10.4	-0.000707546	2.55554	-2.28906	0.0221308	0.330137	-8.42841
ENSG00000242259	C22orf39	0.000166498	4.65587	2.28708	0.0222462	0.330137	-8.73967
ENSG00000108061	SHOC2	-0.000284047	7.20427	-2.28683	0.0222604	0.330137	-8.81028
ENSG00000162929	KIAA1841	-0.000288448	2.91051	-2.28669	0.0222689	0.330137	-8.49817
ENSG00000197121	PGAP1	-0.000494192	3.24978	-2.28646	0.0222819	0.330137	-8.55182
ENSG00000197056	ZMYM1	-0.000450228	3.91426	-2.28637	0.0222877	0.330137	-8.65579
ENSG00000139746	RBM26	-0.00035992	6.14673	-2.28529	0.0223509	0.330137	-8.81559
ENSG00000164330	EBF1	0.000594815	1.82855	2.28475	0.0223827	0.330137	-8.32782
ENSG00000136842	TMOD1	-0.000701017	4.93454	-2.28469	0.0223858	0.330137	-8.76464
ENSG00000169504	CLIC4	-0.000389635	4.93837	-2.28393	0.0224306	0.330137	-8.76886
ENSG00000152700	SAR1B	-0.00023492	5.14298	-2.28331	0.0224673	0.330137	-8.78546
ENSG00000135655	USP15	-0.000305258	9.05105	-2.28312	0.0224786	0.330137	-8.77082
ENSG00000169446	MMGT1	-0.000329348	4.76667	-2.2828	0.022497	0.330137	-8.75993
ENSG00000230084	RP4-613B23.1	-0.000612589	1.07465	-2.28273	0.0225016	0.330137	-8.22848
ENSG00000170540	ARL6IP1	-0.000313011	7.05882	-2.28271	0.0225027	0.330137	-8.82137
ENSG00000141469	SLC14A1	-0.000623561	5.27651	-2.28249	0.0225155	0.330137	-8.79113
ENSG00000277130	RP11-530C5.4	-0.00063541	1.67304	-2.28237	0.0225225	0.330137	-8.30135
ENSG00000129472	RAB2B	-0.00058915	6.54838	-2.28027	0.0226466	0.331358	-8.82917
ENSG00000177853	ZNF518A	-0.000379323	6.51582	-2.28011	0.0226563	0.331358	-8.83055
ENSG00000239213	NCK1-AS1	-0.000298235	1.67319	-2.27847	0.0227538	0.332413	-8.31147
ENSG00000143093	STRIP1	0.000194673	4.90338	2.27781	0.0227934	0.332622	-8.78159
ENSG00000175505	CLCF1	0.000495879	0.862084	2.27716	0.0228322	0.332818	-8.21372
ENSG00000009694	TENM1	-0.000515249	3.92691	-2.27616	0.022892	0.333319	-8.6824
ENSG00000038274	MAT2B	-0.000249425	7.15516	-2.27542	0.0229363	0.333452	-8.83717
ENSG00000150867	PIP4K2A	-0.000493027	8.79883	-2.27476	0.0229758	0.333452	-8.7981
ENSG00000177971	IMP3	0.000253863	4.49364	2.27473	0.0229774	0.333452	-8.75091
ENSG00000181544	FANCB	-0.000415739	2.37909	-2.2722	0.0231299	0.335294	-8.43685
ENSG00000125741	OPA3	0.00024999	3.12536	2.27142	0.0231771	0.335596	-8.5661
ENSG00000125629	INSIG2	-0.000346958	3.98758	-2.27025	0.0232482	0.335596	-8.70404
ENSG00000070182	SPTB	-0.000922255	6.16314	-2.27023	0.0232492	0.335596	-8.84934
ENSG00000154027	AK5	0.000543372	3.01451	2.27017	0.0232531	0.335596	-8.53998
ENSG00000136783	NIPSNAP3A	-0.000401753	3.22892	-2.2693	0.0233061	0.335693	-8.59356
ENSG00000067082	KLF6	-0.000149461	8.25115	-2.26858	0.0233499	0.335693	-8.82872
ENSG00000197006	METTL9	-0.000305402	6.75273	-2.26852	0.0233532	0.335693	-8.85608
ENSG00000148950	IMMP1L	-0.000368376	1.94277	-2.26821	0.0233723	0.335693	-8.3765
ENSG00000274523	WBSCR16	0.000315265	3.60346	2.26796	0.0233877	0.335693	-8.65257
ENSG00000072274	TFRC	-0.000376693	6.41233	-2.26704	0.0234438	0.336118	-8.8596
ENSG00000197256	KANK2	-0.000868877	2.42208	-2.26568	0.0235273	0.336118	-8.46575
ENSG00000227057	WDR46	0.000293052	4.2298	2.26516	0.0235589	0.336118	-8.74454
ENSG00000143155	TIPRL	-0.000318573	4.82467	-2.26471	0.0235869	0.336118	-8.80555
ENSG00000246082	NUDT16P1	-0.000390151	2.45025	-2.26429	0.0236126	0.336118	-8.47639
ENSG00000141956	PRDM15	0.000258973	3.60506	2.26373	0.0236468	0.336118	-8.66301
ENSG00000164187	LMBRD2	-0.000369611	5.22691	-2.26279	0.0237047	0.336118	-8.83638
ENSG00000101557	USP14	-0.000335175	4.19953	-2.26272	0.0237093	0.336118	-8.74636
ENSG00000131242	RAB11FIP4	0.000276068	6.62459	2.26265	0.0237134	0.336118	-8.86994
ENSG00000166225	FRS2	-0.000239679	4.6831	-2.26202	0.0237528	0.336118	-8.79969
ENSG00000172215	CXCR6	0.000561521	3.06516	2.26194	0.0237574	0.336118	-8.58131
ENSG00000151239	TWF1	-0.000454644	4.64242	-2.26178	0.0237674	0.336118	-8.79717
ENSG00000165406	MARCH8	-0.000647584	8.62999	-2.26128	0.0237983	0.336118	-8.8339
ENSG00000004660	CAMKK1	0.000408923	3.31568	2.26126	0.0237997	0.336118	-8.6256
ENSG00000174695	TMEM167A	-0.000382384	6.29801	-2.26123	0.0238016	0.336118	-8.87257
ENSG00000140941	MAP1LC3B	-0.000307752	5.62464	-2.26028	0.0238604	0.336156	-8.86109
ENSG00000112972	HMGCS1	-0.00025365	4.35493	-2.25995	0.0238811	0.336156	-8.7724
ENSG00000245532	NEAT1	-0.000645327	10.4082	-2.25984	0.0238878	0.336156	-8.7752
ENSG00000100744	GSKIP	-0.000397969	3.98782	-2.25932	0.0239202	0.336156	-8.7312
ENSG00000182810	DDX28	0.000278114	3.69831	2.25905	0.0239366	0.336156	-8.68868
ENSG00000158856	DMTN	-0.000835606	6.94787	-2.2574	0.0240396	0.336156	-8.87899
ENSG00000156869	FRRS1	-0.00030751	2.86369	-2.25723	0.0240503	0.336156	-8.56548
ENSG00000170522	ELOVL6	-0.000398316	2.51065	-2.25698	0.0240662	0.336156	-8.49343
ENSG00000168374	ARF4	-0.000210584	5.26131	-2.25691	0.0240703	0.336156	-8.85219
ENSG00000100395	L3MBTL2	0.000243184	4.2703	2.25662	0.0240883	0.336156	-8.76774
ENSG00000106771	TMEM245	-0.000238421	5.75129	-2.25645	0.024099	0.336156	-8.87236
ENSG00000147874	HAUS6	-0.000261687	5.15689	-2.25625	0.0241118	0.336156	-8.84627
ENSG00000117724	CENPF	-0.000405345	2.73618	-2.25501	0.0241895	0.336881	-8.54087
ENSG00000171960	PPIH	0.000173032	3.57242	2.25413	0.0242449	0.337295	-8.67818
ENSG00000117533	VAMP4	-0.00045971	4.47225	-2.25311	0.0243091	0.337785	-8.7987
ENSG00000168116	KIAA1586	-0.000537189	3.59429	-2.25253	0.0243456	0.337785	-8.68439
ENSG00000197037	ZSCAN25	0.000189194	4.7354	2.25235	0.0243574	0.337785	-8.82456
ENSG00000106462	EZH2	-0.000320979	2.5563	-2.25134	0.0244208	0.338306	-8.51549
ENSG00000138069	RAB1A	-0.000225517	5.79156	-2.24992	0.0245109	0.33883	-8.88957
ENSG00000221963	APOL6	-0.000334864	8.10296	-2.24971	0.0245246	0.33883	-8.87608
ENSG00000279529	CTD-3222D19.8	0.000238927	2.50222	2.24951	0.0245372	0.33883	-8.50884
ENSG00000156384	SFR1	-0.0004374	1.7701	-2.24912	0.0245619	0.33883	-8.39466
ENSG00000164211	STARD4	-0.000448354	3.87878	-2.2465	0.0247291	0.34051	-8.74184
ENSG00000131480	AOC2	0.000499605	2.28799	2.2464	0.0247356	0.34051	-8.48409
ENSG00000136003	ISCU	-0.000236918	6.49235	-2.24557	0.0247892	0.34089	-8.90862
ENSG00000134779	TPGS2	-0.000330429	5.69696	-2.24423	0.0248751	0.341563	-8.8986
ENSG00000145431	PDGFC	-0.000380177	2.02101	-2.24399	0.0248902	0.341563	-8.44393
ENSG00000151923	TIAL1	-0.000337432	4.84212	-2.2429	0.0249607	0.341708	-8.85514
ENSG00000114978	MOB1A	-0.000253792	8.10579	-2.24265	0.0249766	0.341708	-8.89107
ENSG00000167768	KRT1	-0.000944564	5.18018	-2.2424	0.0249931	0.341708	-8.8695
ENSG00000170448	NFXL1	-0.000543631	4.66085	-2.24175	0.0250352	0.341708	-8.84337
ENSG00000067167	TRAM1	-0.000377369	6.95751	-2.24154	0.0250486	0.341708	-8.91543
ENSG00000174456	C12orf76	-0.000205321	3.30249	-2.24133	0.0250624	0.341708	-8.66449
ENSG00000130844	ZNF331	0.000208432	3.60234	2.24084	0.0250942	0.341708	-8.71204
ENSG00000110048	OSBP	0.000149717	5.54792	2.24061	0.0251092	0.341708	-8.90165
ENSG00000133606	MKRN1	-0.000618368	9.97137	-2.23989	0.0251556	0.341986	-8.83711
ENSG00000086666	ZFAND6	-0.000270037	5.915	-2.23586	0.0254189	0.345207	-8.92432
ENSG00000272807	RP11-260M2.1	-0.00059699	1.42969	-2.2347	0.0254949	0.345827	-8.37529
ENSG00000140632	GLYR1	0.00016107	5.8971	2.23408	0.0255355	0.345827	-8.92775
ENSG00000076043	REXO2	-0.000294002	4.13204	-2.23396	0.0255436	0.345827	-8.80145
ENSG00000137656	BUD13	0.000153794	4.14712	2.23155	0.0257031	0.347095	-8.81192
ENSG00000185963	BICD2	0.000246995	6.48197	2.23144	0.0257099	0.347095	-8.93999
ENSG00000135069	PSAT1	-0.000436441	0.998422	-2.2311	0.0257326	0.347095	-8.33295
ENSG00000107554	DNMBP	0.000344528	3.23103	2.2308	0.0257523	0.347095	-8.67578
ENSG00000115355	CCDC88A	-0.000300039	6.21857	-2.23055	0.0257695	0.347095	-8.94022
ENSG00000103248	MTHFSD	0.000194124	3.83982	2.2289	0.025879	0.347423	-8.77646
ENSG00000120158	RCL1	-0.000320101	3.98163	-2.22854	0.0259028	0.347423	-8.79687
ENSG00000213186	TRIM59	-0.000371065	3.78378	-2.22851	0.0259047	0.347423	-8.76771
ENSG00000085563	ABCB1	0.000359441	3.97086	2.22838	0.0259136	0.347423	-8.79045
ENSG00000006576	PHTF2	-0.000303687	5.46823	-2.22806	0.0259351	0.347423	-8.92595
ENSG00000152601	MBNL1	-0.000208767	9.41711	-2.22779	0.0259527	0.347423	-8.88408
ENSG00000121671	CRY2	0.000239628	4.80095	2.22677	0.0260213	0.347986	-8.88734
ENSG00000008394	MGST1	-0.000363615	2.44882	-2.2257	0.0260926	0.348499	-8.56428
ENSG00000092470	WDR76	-0.000244624	3.28235	-2.22529	0.0261206	0.348499	-8.69698
ENSG00000206053	HN1L	0.000139425	4.14331	2.22474	0.0261573	0.348499	-8.82402
ENSG00000075790	BCAP29	-0.000455597	3.34871	-2.22427	0.026189	0.348499	-8.71309
ENSG00000175182	FAM131A	0.000303784	3.39004	2.22422	0.0261925	0.348499	-8.7188
ENSG00000078487	ZCWPW1	0.000279987	1.9215	2.22256	0.0263044	0.349633	-8.47353
ENSG00000043514	TRIT1	0.000191768	3.85878	2.22211	0.0263344	0.349677	-8.79388
ENSG00000163848	ZNF148	-0.000290802	7.08943	-2.22098	0.0264111	0.350326	-8.96018
ENSG00000132485	ZRANB2	-0.000438129	6.21317	-2.22003	0.0264758	0.350326	-8.96322
ENSG00000185880	TRIM69	-0.00024374	5.83612	-2.22	0.0264779	0.350326	-8.95751
ENSG00000081320	STK17B	-0.000308595	9.03709	-2.21952	0.02651	0.350326	-8.91455
ENSG00000116199	FAM20B	-0.000280344	5.4744	-2.21942	0.0265168	0.350326	-8.94636
ENSG00000147324	MFHAS1	-0.000263979	5.0715	-2.21639	0.0267239	0.352504	-8.92992
ENSG00000075340	ADD2	0.00039586	2.96772	2.21622	0.0267354	0.352504	-8.6606
ENSG00000042980	ADAM28	0.000408227	4.93883	2.21513	0.02681	0.352974	-8.92153
ENSG00000104331	IMPAD1	-0.000230306	5.50788	-2.21471	0.026839	0.352974	-8.95771
ENSG00000106367	AP1S1	-0.000355487	1.9596	-2.21453	0.0268518	0.352974	-8.50132
ENSG00000162819	BROX	-0.000302157	6.25224	-2.21385	0.0268983	0.353232	-8.97819
ENSG00000165501	LRR1	-0.000324637	2.88959	-2.21247	0.0269935	0.354128	-8.66063
ENSG00000084733	RAB10	-0.000193862	6.86266	-2.21191	0.0270325	0.354285	-8.98228
ENSG00000130684	ZNF337	0.000174499	4.94681	2.21041	0.0271363	0.355291	-8.9331
ENSG00000182628	SKA2	-0.000395908	2.80645	-2.20698	0.0273751	0.35806	-8.65912
ENSG00000120458	MSANTD2	0.000199961	3.75566	2.20597	0.0274457	0.358281	-8.81211
ENSG00000172053	QARS	0.000232778	6.29222	2.20563	0.0274699	0.358281	-8.99624
ENSG00000117322	CR2	0.000564559	2.26134	2.20541	0.0274853	0.358281	-8.57197
ENSG00000163743	RCHY1	-0.000370868	4.75972	-2.20482	0.0275265	0.358281	-8.93339
ENSG00000112759	SLC29A1	-0.000444067	1.78713	-2.20404	0.0275812	0.358281	-8.52164
ENSG00000136448	NMT1	0.000152925	5.83928	2.20393	0.0275891	0.358281	-8.99277
ENSG00000138386	NAB1	-0.000229776	5.61113	-2.20393	0.0275892	0.358281	-8.98625
ENSG00000126860	EVI2A	-0.000678717	6.24968	-2.20329	0.0276342	0.358281	-9.00109
ENSG00000162695	SLC30A7	-0.000277008	5.99875	-2.20324	0.0276378	0.358281	-8.99763
ENSG00000102978	POLR2C	0.000167273	5.19459	2.20251	0.0276893	0.358594	-8.96945
ENSG00000182197	EXT1	0.000224331	4.36479	2.20171	0.0277455	0.358968	-8.90143
ENSG00000286129		0.000368262	2.56926	2.19839	0.0279818	0.361015	-8.63362
ENSG00000042062	FAM65C	-0.000758326	1.10227	-2.19818	0.0279962	0.361015	-8.41871
ENSG00000107742	SPOCK2	0.000372624	6.76774	2.19804	0.0280067	0.361015	-9.01252
ENSG00000117643	MAN1C1	0.000387539	3.42664	2.19794	0.0280138	0.361015	-8.77615
ENSG00000132334	PTPRE	0.000172657	7.89068	2.19671	0.0281014	0.361109	-8.99834
ENSG00000254635	WAC-AS1	-0.000252939	4.17314	-2.1967	0.0281018	0.361109	-8.89365
ENSG00000114120	SLC25A36	-0.000389056	5.47791	-2.19668	0.0281037	0.361109	-8.99513
ENSG00000162496	DHRS3	0.000373045	3.33818	2.19516	0.0282125	0.361651	-8.76714
ENSG00000122008	POLK	-0.000311411	5.2548	-2.19489	0.0282321	0.361651	-8.98956
ENSG00000285976		-0.000745351	3.60283	-2.19472	0.0282443	0.361651	-8.81539
ENSG00000122483	CCDC18	-0.000385083	3.76158	-2.19455	0.0282562	0.361651	-8.84151
ENSG00000072858	SIDT1	0.000193686	5.07334	2.19359	0.0283252	0.362165	-8.97706
ENSG00000155380	SLC16A1	-0.000265401	3.51222	-2.19323	0.0283515	0.362165	-8.80422
ENSG00000281106	LINC00282	0.000432321	4.46144	2.19198	0.0284415	0.362961	-8.93072
ENSG00000171208	NETO2	0.00032998	1.97805	2.19152	0.028475	0.363035	-8.55738
ENSG00000197780	TAF13	-0.000469861	2.28961	-2.18967	0.028609	0.364318	-8.6092
ENSG00000118242	MREG	-0.000329819	1.82976	-2.18887	0.0286673	0.364318	-8.53628
ENSG00000129317	PUS7L	-0.0003818	5.53663	-2.18866	0.0286826	0.364318	-9.01503
ENSG00000244720	RP11-402J7.2	-0.000588618	2.2062	-2.1886	0.0286867	0.364318	-8.59719
ENSG00000214046	SMIM7	0.000134004	4.7457	2.18754	0.028764	0.364947	-8.97036
ENSG00000111605	CPSF6	-0.00045456	6.05093	-2.18637	0.0288494	0.365389	-9.03483
ENSG00000109046	WSB1	-0.000218526	7.49773	-2.18618	0.028863	0.365389	-9.03009
ENSG00000136100	VPS36	-0.000208281	5.8216	-2.18571	0.0288977	0.365389	-9.03211
ENSG00000131401	NAPSB	0.000554629	4.75672	2.18511	0.028942	0.365389	-8.97639
ENSG00000204287	HLA-DRA	0.000287722	8.7169	2.18495	0.0289531	0.365389	-9.00039
ENSG00000148297	MED22	0.000303349	5.17056	2.18478	0.028966	0.365389	-9.00755
ENSG00000143742	SRP9	-0.000428176	5.78806	-2.18186	0.029181	0.367319	-9.03993
ENSG00000182749	PAQR7	0.000331642	2.58754	2.18121	0.0292288	0.367319	-8.67566
ENSG00000135775	COG2	0.000128369	5.00728	2.18064	0.0292712	0.367319	-9.00367
ENSG00000181061	HIGD1A	-0.000387941	4.28745	-2.18059	0.029275	0.367319	-8.94253
ENSG00000080822	CLDND1	-0.000273642	5.84438	-2.18039	0.02929	0.367319	-9.04367
ENSG00000131944	C19orf40	0.000414541	1.00744	2.18037	0.0292916	0.367319	-8.44266
ENSG00000105205	CLC	-0.000520588	5.00758	-2.18003	0.0293161	0.367319	-9.00005
ENSG00000118496	FBXO30	-0.00030292	5.45096	-2.17911	0.0293849	0.367319	-9.03445
ENSG00000143727	ACP1	-0.000321056	5.64866	-2.17849	0.0294308	0.367319	-9.04134
ENSG00000159147	DONSON	-0.000268048	1.8239	-2.17773	0.0294874	0.367319	-8.55919
ENSG00000258476	RP11-76E17.3	0.000569544	3.40239	2.1774	0.029512	0.367319	-8.83561
ENSG00000082074	FYB	-0.000283198	8.76066	-2.17718	0.0295282	0.367319	-9.01649
ENSG00000116668	SWT1	-0.000419236	4.64634	-2.17686	0.0295524	0.367319	-8.98381
ENSG00000133641	C12orf29	-0.000380576	3.65073	-2.17664	0.0295689	0.367319	-8.86184
ENSG00000166886	NAB2	0.000403168	2.52311	2.17634	0.0295912	0.367319	-8.67458
ENSG00000236320	SLFN14	-0.000660962	3.40414	-2.17614	0.0296063	0.367319	-8.81823
ENSG00000185127	C6orf120	-0.000254518	4.94628	-2.17598	0.0296183	0.367319	-9.01129
ENSG00000168118	RAB4A	-0.000233468	4.18574	-2.17592	0.0296229	0.367319	-8.93836
ENSG00000148737	TCF7L2	-0.00043191	2.56166	-2.17511	0.0296836	0.367574	-8.68965
ENSG00000084073	ZMPSTE24	-0.000313122	5.21504	-2.17466	0.0297175	0.367574	-9.03224
ENSG00000160185	UBASH3A	0.000326276	4.5811	2.17432	0.0297423	0.367574	-8.97895
ENSG00000155744	FAM126B	-0.000341074	7.68769	-2.17386	0.0297769	0.367574	-9.05256
ENSG00000172687	ZNF738	0.000295378	2.05494	2.1731	0.0298344	0.367574	-8.60398
ENSG00000103769	RAB11A	-0.000243654	6.03333	-2.17308	0.0298357	0.367574	-9.06456
ENSG00000114988	LMAN2L	0.000192108	3.15888	2.17303	0.0298396	0.367574	-8.79074
ENSG00000158427	TMSB15B	0.000398876	0.711482	2.17205	0.0299137	0.368008	-8.43591
ENSG00000154001	PPP2R5E	-0.000296462	4.88692	-2.1717	0.02994	0.368008	-9.01588
ENSG00000051108	HERPUD1	0.000129428	6.17942	2.17145	0.029959	0.368008	-9.07021
ENSG00000149480	MTA2	0.000208162	6.30531	2.17048	0.0300325	0.36847	-9.07288
ENSG00000085832	EPS15	-0.000199749	7.21909	-2.17021	0.0300528	0.36847	-9.06977
ENSG00000183960	KCNH8	0.000673726	1.40832	2.1693	0.030122	0.368701	-8.52709
ENSG00000169994	MYO7B	0.000633591	1.79629	2.16885	0.030156	0.368701	-8.57706
ENSG00000145882	PCYOX1L	0.000201258	3.98147	2.16871	0.0301664	0.368701	-8.92681
ENSG00000142875	PRKACB	-0.000388772	6.61405	-2.16822	0.0302037	0.368701	-9.07775
ENSG00000110079	MS4A4A	-0.000467766	2.41882	-2.16811	0.0302122	0.368701	-8.68258
ENSG00000144455	SUMF1	0.000167008	4.91884	2.16609	0.0303666	0.369464	-9.03111
ENSG00000165424	ZCCHC24	0.000406425	1.31484	2.16572	0.030395	0.369464	-8.51387
ENSG00000093134	VNN3	0.000332486	6.42511	2.16552	0.0304102	0.369464	-9.08137
ENSG00000164691	TAGAP	-0.000192914	7.89393	-2.16547	0.030414	0.369464	-9.06714
ENSG00000114520	SNX4	-0.000417014	3.60813	-2.16535	0.0304226	0.369464	-8.88513
ENSG00000088808	PPP1R13B	0.000323833	1.91973	2.16508	0.0304437	0.369464	-8.60171
ENSG00000077147	TM9SF3	-0.00034205	6.85521	-2.16462	0.0304791	0.369552	-9.0857
ENSG00000061676	NCKAP1	-0.000357441	3.21207	-2.16421	0.0305108	0.369595	-8.81808
ENSG00000067900	ROCK1	-0.000225215	7.60752	-2.16287	0.0306131	0.370217	-9.0788
ENSG00000181744	C3orf58	-0.000277743	4.78882	-2.16227	0.0306598	0.370217	-9.02977
ENSG00000006459	KDM7A	-0.000251578	7.77853	-2.16197	0.0306832	0.370217	-9.07707
ENSG00000186105	LRRC70	-0.000538584	1.30243	-2.16196	0.0306836	0.370217	-8.51699
ENSG00000137710	RDX	-0.000273655	3.99226	-2.16171	0.0307032	0.370217	-8.9459
ENSG00000224307	RP11-344B5.2	0.000440388	1.36007	2.16089	0.030766	0.370633	-8.53286
ENSG00000124374	PAIP2B	0.000273797	3.28548	2.16027	0.0308138	0.370721	-8.83557
ENSG00000134830	C5AR2	0.000248088	6.67733	2.15953	0.0308714	0.370721	-9.0958
ENSG00000244045	TMEM199	0.000129405	4.6817	2.15929	0.0308902	0.370721	-9.02627
ENSG00000107372	ZFAND5	-0.000207923	7.38508	-2.15898	0.0309142	0.370721	-9.09133
ENSG00000131171	SH3BGRL	-0.00035465	7.15894	-2.15897	0.0309146	0.370721	-9.09483
ENSG00000109805	NCAPG	-0.000638121	1.11451	-2.15758	0.0310228	0.371336	-8.5088
ENSG00000068912	ERLEC1	-0.000312026	4.43437	-2.1574	0.031037	0.371336	-9.00721
ENSG00000177455	CD19	0.000631984	2.27381	2.15716	0.0310555	0.371336	-8.68082
ENSG00000116337	AMPD2	0.00041802	6.68358	2.15686	0.0310791	0.371336	-9.10291
ENSG00000163320	CGGBP1	-0.000309243	7.13408	-2.15594	0.031151	0.371758	-9.10172
ENSG00000145725	PPIP5K2	-0.000303835	6.80472	-2.1556	0.0311775	0.371758	-9.10561
ENSG00000246627	CACNA1C-AS1	0.000424756	0.740607	2.15469	0.0312487	0.371758	-8.47363
ENSG00000068366	ACSL4	-0.000287634	7.16758	-2.15465	0.0312522	0.371758	-9.10374
ENSG00000148481	FAM188A	-0.000274085	4.46296	-2.15441	0.0312709	0.371758	-9.01647
ENSG00000169554	ZEB2	-0.000247108	8.60106	-2.15389	0.0313118	0.371758	-9.07145
ENSG00000142686	C1orf216	-0.000270812	2.94358	-2.15387	0.0313128	0.371758	-8.79846
ENSG00000109016	DHRS7B	0.000189488	3.71045	2.15278	0.031399	0.372444	-8.92717
ENSG00000143167	GPA33	0.000409755	1.72456	2.15155	0.0314955	0.373169	-8.59591
ENSG00000133624	ZNF767P	0.000205534	4.81038	2.15087	0.0315497	0.373169	-9.05408
ENSG00000121104	FAM117A	-0.000536356	5.45773	-2.15085	0.031551	0.373169	-9.09491
ENSG00000164091	WDR82	0.000134112	7.53167	2.15056	0.0315739	0.373169	-9.1071
ENSG00000081148	IMPG2	-0.000329687	1.66227	-2.14881	0.0317128	0.374034	-8.59561
ENSG00000237499	RP11-356I2.4	0.000308542	2.20254	2.14847	0.0317393	0.374034	-8.67754
ENSG00000006451	RALA	-0.000275507	3.56142	-2.14846	0.0317405	0.374034	-8.91162
ENSG00000204070	SYS1	0.000161988	4.72143	2.14737	0.0318266	0.374034	-9.05483
ENSG00000064886	CHI3L2	0.000433439	2.83883	2.14695	0.0318604	0.374034	-8.79206
ENSG00000116675	DNAJC6	-0.000602286	3.99748	-2.14656	0.0318916	0.374034	-8.98232
ENSG00000101935	AMMECR1	-0.000228668	4.14229	-2.14638	0.0319061	0.374034	-8.99423
ENSG00000132773	TOE1	0.000213713	2.8872	2.14624	0.0319168	0.374034	-8.80148
ENSG00000167005	NUDT21	-0.000281624	5.71669	-2.14611	0.0319278	0.374034	-9.11442
ENSG00000276550	HERC2P2	0.000404088	5.19365	2.14581	0.0319514	0.374034	-9.08986
ENSG00000162894	FAIM3	0.000288115	4.95823	2.1446	0.0320485	0.374034	-9.07378
ENSG00000066557	LRRC40	-0.000379389	3.70911	-2.14456	0.0320511	0.374034	-8.94177
ENSG00000115904	SOS1	-0.000286486	6.25301	-2.14417	0.0320829	0.374034	-9.12943
ENSG00000118816	CCNI	-0.00043624	7.44333	-2.144	0.0320966	0.374034	-9.1226
ENSG00000287480		-0.00056454	0.911306	-2.14378	0.0321138	0.374034	-8.50848
ENSG00000183624	HMCES	0.000184926	4.5767	2.14343	0.0321419	0.374034	-9.04882
ENSG00000119917	IFIT3	-0.000701111	7.22259	-2.14319	0.032161	0.374034	-9.12734
ENSG00000169964	TMEM42	0.000232153	3.2841	2.14299	0.0321776	0.374034	-8.87673
ENSG00000120539	MASTL	-0.000310706	3.51851	-2.14285	0.0321887	0.374034	-8.91779
ENSG00000137959	IFI44L	-0.00102104	5.36472	-2.14208	0.0322507	0.374422	-9.1045
ENSG00000163050	ADCK3	0.000385845	5.29783	2.14145	0.0323009	0.374673	-9.10742
ENSG00000120314	WDR55	0.000146613	5.0991	2.14089	0.0323468	0.374874	-9.09748
ENSG00000133317	LGALS12	0.000409019	2.41424	2.13979	0.0324356	0.375495	-8.74206
ENSG00000101445	PPP1R16B	0.000233277	5.65394	2.13951	0.0324576	0.375495	-9.12418
ENSG00000141026	MED9	0.000209512	2.96513	2.13839	0.0325485	0.376215	-8.83229
ENSG00000153317	ASAP1	-0.000369153	6.26316	-2.13794	0.0325851	0.376307	-9.14291
ENSG00000184271	POU6F1	0.000377401	1.91603	2.13734	0.0326338	0.376437	-8.65954
ENSG00000196586	MYO6	-0.000517889	2.93774	-2.1371	0.0326538	0.376437	-8.82964
ENSG00000158578	ALAS2	-0.000897768	10.5462	-2.13594	0.0327483	0.376679	-9.0451
ENSG00000160633	SAFB	0.000164197	6.24733	2.13585	0.0327556	0.376679	-9.14748
ENSG00000177192	PUS1	0.000382806	2.8202	2.13578	0.032761	0.376679	-8.81288
ENSG00000172007	RAB33B	-0.000273642	4.93899	-2.1346	0.0328573	0.377456	-9.10019
ENSG00000143971	ETAA1	-0.000495172	3.61443	-2.13421	0.0328899	0.3775	-8.94791
ENSG00000135318	NT5E	0.000550436	2.83838	2.13378	0.0329247	0.377569	-8.82474
ENSG00000116212	LRRC42	-0.00022506	1.88902	-2.13319	0.0329735	0.377798	-8.6655
ENSG00000132950	ZMYM5	-0.000274245	4.4425	-2.13247	0.0330325	0.378144	-9.06165
ENSG00000166405	RIC3	0.000327508	3.92677	2.13183	0.0330848	0.378224	-8.99656
ENSG00000182518	FAM104B	-0.000401372	1.61409	-2.13071	0.0331769	0.378224	-8.62838
ENSG00000253924	RP11-1023P17.2	0.000652629	1.44281	2.13008	0.0332294	0.378224	-8.61488
ENSG00000173193	PARP14	-0.00036851	8.96687	-2.13	0.0332362	0.378224	-9.11195
ENSG00000173535	TNFRSF10C	0.000339413	8.40723	2.12984	0.0332489	0.378224	-9.12843
ENSG00000168615	ADAM9	-0.000239672	4.82383	-2.12977	0.033255	0.378224	-9.10274
ENSG00000102910	LONP2	0.000139125	6.97773	2.12961	0.0332683	0.378224	-9.15986
ENSG00000140525	FANCI	-0.000228293	3.52408	-2.12958	0.0332701	0.378224	-8.94629
ENSG00000272688	RP13-270P17.3	0.000369627	0.952761	2.12665	0.0335133	0.380502	-8.54977
ENSG00000160695	VPS11	0.000179038	5.1309	2.12647	0.0335285	0.380502	-9.12994
ENSG00000168300	PCMTD1	-0.000319587	7.21459	-2.12606	0.0335625	0.380559	-9.16465
ENSG00000055208	TAB2	-0.000204874	7.03978	-2.12564	0.0335973	0.380617	-9.16779
ENSG00000096746	HNRNPH3	-0.000361999	5.7794	-2.12502	0.033649	0.380617	-9.1619
ENSG00000152766	ANKRD22	-0.000653538	1.79139	-2.12496	0.0336547	0.380617	-8.67312
ENSG00000198876	DCAF12	-0.000658168	10.1216	-2.12443	0.0336987	0.380683	-9.08344
ENSG00000066923	STAG3	0.00042051	1.00765	2.12416	0.033721	0.380683	-8.56574
ENSG00000140044	JDP2	0.000297644	4.36115	2.12385	0.0337475	0.380683	-9.07032
ENSG00000085274	MYNN	-0.000346659	4.68199	-2.12277	0.0338376	0.38137	-9.10469
ENSG00000103150	MLYCD	0.000248883	4.8138	2.12182	0.0339179	0.381947	-9.11704
ENSG00000005469	CROT	-0.000279303	3.28401	-2.12078	0.0340048	0.382143	-8.92283
ENSG00000156504	FAM122B	-0.0003809	4.03524	-2.12068	0.0340137	0.382143	-9.03738
ENSG00000164305	CASP3	-0.000342349	4.90792	-2.12051	0.034028	0.382143	-9.12936
ENSG00000205133	TRIQK	-0.000366248	4.128	-2.1202	0.0340541	0.382143	-9.05302
ENSG00000124226	RNF114	0.000117825	6.05639	2.11944	0.034118	0.382143	-9.17988
ENSG00000103423	DNAJA3	0.000223839	4.44853	2.11902	0.0341533	0.382143	-9.08717
ENSG00000168303	MPLKIP	-0.000217405	3.88334	-2.11891	0.034163	0.382143	-9.02152
ENSG00000025039	RRAGD	-0.000254779	4.71948	-2.11885	0.0341683	0.382143	-9.11672
ENSG00000116030	SUMO1	-0.000290605	4.93285	-2.11806	0.0342346	0.382559	-9.13522
ENSG00000275052	SMEK2	-0.000247431	7.17806	-2.11695	0.0343288	0.383285	-9.1844
ENSG00000136279	DBNL	0.00027711	8.1062	2.11648	0.034369	0.383407	-9.16584
ENSG00000213096	ZNF254	-0.000427177	4.40955	-2.11574	0.0344315	0.383778	-9.09019
ENSG00000164327	RICTOR	-0.000276058	8.36124	-2.11455	0.0345329	0.384582	-9.16282
ENSG00000163606	CD200R1	-0.000317723	4.03964	-2.11402	0.0345784	0.384761	-9.05236
ENSG00000088766	CRLS1	-0.000301818	3.73918	-2.11282	0.0346816	0.385501	-9.01518
ENSG00000267858	MZF1-AS1	0.000393912	1.88746	2.11256	0.0347036	0.385501	-8.70649
ENSG00000134326	CMPK2	-0.000713455	4.39346	-2.11172	0.0347755	0.385871	-9.09786
ENSG00000254685	FPGT	-0.000392542	4.44417	-2.11134	0.0348083	0.385871	-9.10761
ENSG00000091490	SEL1L3	0.000206764	6.21427	2.11114	0.0348251	0.385871	-9.19689
ENSG00000177485	ZBTB33	-0.000351863	5.4036	-2.11	0.0349234	0.386012	-9.17892
ENSG00000136504	KAT7	0.000160816	6.64501	2.10999	0.0349249	0.386012	-9.2034
ENSG00000244560	RP4-800G7.2	0.000491196	1.37146	2.1098	0.0349407	0.386012	-8.64042
ENSG00000078246	TULP3	0.00025402	1.62797	2.10866	0.035039	0.386012	-8.67659
ENSG00000079308	TNS1	-0.000788478	7.20663	-2.10837	0.0350646	0.386012	-9.20091
ENSG00000180139	ACTA2-AS1	0.000376539	2.14793	2.1075	0.0351393	0.386012	-8.7588
ENSG00000151292	CSNK1G3	-0.000373374	4.81374	-2.10747	0.0351423	0.386012	-9.1479
ENSG00000198805	PNP	-0.000329643	5.84217	-2.1073	0.0351568	0.386012	-9.20023
ENSG00000144040	SFXN5	0.000304188	4.31412	2.10728	0.0351586	0.386012	-9.10212
ENSG00000081760	AACS	0.000255123	2.78957	2.10683	0.0351982	0.386012	-8.87193
ENSG00000204634	TBC1D8	0.000263698	4.59056	2.10656	0.0352216	0.386012	-9.13145
ENSG00000120519	SLC10A7	-0.000254454	3.44787	-2.10649	0.0352272	0.386012	-8.98056
ENSG00000121749	TBC1D15	-0.000320183	5.50114	-2.10626	0.0352473	0.386012	-9.19209
ENSG00000114450	GNB4	-0.000295914	6.32245	-2.10623	0.0352498	0.386012	-9.21026
ENSG00000198176	TFDP1	-0.000429366	5.66008	-2.10549	0.0353143	0.386137	-9.19982
ENSG00000177868	CCDC23	-0.000397767	3.39079	-2.10542	0.0353201	0.386137	-8.97745
ENSG00000039068	CDH1	-0.000617596	2.43982	-2.10501	0.035356	0.386137	-8.81867
ENSG00000162836	ACP6	0.000258725	3.68078	2.10475	0.035379	0.386137	-9.02176
ENSG00000154127	UBASH3B	-0.000238208	4.81687	-2.10309	0.0355236	0.386523	-9.15845
ENSG00000285077		-0.00051887	1.30945	-2.10282	0.0355469	0.386523	-8.64779
ENSG00000170584	NUDCD2	-0.00032274	2.921	-2.10279	0.0355498	0.386523	-8.90063
ENSG00000171169	NAIF1	0.000299464	3.26752	2.10235	0.0355883	0.386523	-8.96113
ENSG00000007312	CD79B	0.000557405	4.87374	2.10234	0.0355896	0.386523	-9.15623
ENSG00000171236	LRG1	0.000457847	5.69929	2.10188	0.0356295	0.386523	-9.20437
ENSG00000087338	GMCL1	-0.000289005	5.11848	-2.1017	0.0356456	0.386523	-9.18194
ENSG00000251513	CTD-2215E18.1	0.000711173	1.1574	2.10165	0.03565	0.386523	-8.63161
ENSG00000004455	AK2	0.000101814	6.51123	2.10112	0.0356959	0.386701	-9.22205
ENSG00000143952	VPS54	-0.000233765	5.09609	-2.09885	0.0358962	0.38855	-9.18659
ENSG00000151233	GXYLT1	-0.000323616	4.49347	-2.09805	0.0359667	0.388991	-9.13898
ENSG00000082146	STRADB	-0.000655253	9.26183	-2.09721	0.0360412	0.389476	-9.17102
ENSG00000124641	MED20	-0.000144076	3.6696	-2.09539	0.0362022	0.390753	-9.04147
ENSG00000110696	C11orf58	-0.000253004	6.79103	-2.0943	0.0362997	0.390753	-9.23564
ENSG00000236287	ZBED5	-0.000332468	5.5228	-2.09428	0.0363012	0.390753	-9.2171
ENSG00000204257	HLA-DMA	0.000249725	5.54772	2.09367	0.0363558	0.390753	-9.21933
ENSG00000126814	TRMT5	-0.000269052	2.68123	-2.09366	0.0363567	0.390753	-8.87912
ENSG00000107864	CPEB3	-0.000267516	2.97767	-2.09357	0.0363645	0.390753	-8.93315
ENSG00000170430	MGMT	0.000309998	3.29095	2.09316	0.036401	0.390753	-8.9836
ENSG00000146909	NOM1	0.00013551	4.35824	2.09296	0.0364188	0.390753	-9.13302
ENSG00000237135	DDX10P1	-0.000432325	2.18897	-2.09287	0.0364274	0.390753	-8.79687
ENSG00000164466	SFXN1	-0.000170708	4.95783	-2.09222	0.0364851	0.390997	-9.1884
ENSG00000144445	KANSL1L	-0.000245317	4.68327	-2.09195	0.0365097	0.390997	-9.16994
ENSG00000137210	TMEM14B	-0.000245512	4.23834	-2.08851	0.0368183	0.393756	-9.13229
ENSG00000086730	LAT2	0.000261124	6.7932	2.08829	0.0368383	0.393756	-9.24738
ENSG00000120162	MOB3B	0.000321453	2.35465	2.08805	0.0368602	0.393756	-8.83586
ENSG00000159713	TPPP3	0.000637605	1.42453	2.08744	0.0369151	0.393756	-8.69427
ENSG00000101052	IFT52	-0.000277628	3.74913	-2.08741	0.0369175	0.393756	-9.07087
ENSG00000171219	CDC42BPG	0.00059346	0.818828	2.08586	0.0370579	0.394934	-8.62557
ENSG00000074657	ZNF532	0.000289388	3.19368	2.08458	0.037174	0.395708	-8.98628
ENSG00000142731	PLK4	-0.000404187	1.21511	-2.08439	0.037191	0.395708	-8.67343
ENSG00000254004	ZNF260	-0.000380298	3.5668	-2.08375	0.0372493	0.396008	-9.04743
ENSG00000069974	RAB27A	-0.000267442	6.48981	-2.08296	0.0373217	0.396107	-9.26002
ENSG00000104131	EIF3J	-0.000306169	4.65235	-2.08291	0.0373258	0.396107	-9.18516
ENSG00000231160	KLF3-AS1	0.000406925	1.48213	2.08227	0.0373844	0.396107	-8.70921
ENSG00000065809	FAM107B	-0.000194351	7.35857	-2.08121	0.0374819	0.396107	-9.25668
ENSG00000264456	RP11-848P1.2	-0.000338754	1.38238	-2.08088	0.0375122	0.396107	-8.70266
ENSG00000107789	MINPP1	-0.000351319	3.22577	-2.08068	0.0375298	0.396107	-9.00024
ENSG00000155975	VPS37A	-0.000205323	5.03052	-2.08062	0.0375355	0.396107	-9.22038
ENSG00000113810	SMC4	-0.000289169	5.45303	-2.08031	0.0375645	0.396107	-9.24411
ENSG00000027001	MIPEP	0.000189304	2.52894	2.07976	0.0376147	0.396107	-8.8816
ENSG00000111727	HCFC2	-0.000263135	4.54243	-2.07967	0.0376231	0.396107	-9.18111
ENSG00000073578	SDHA	0.000166238	5.94187	2.07961	0.0376278	0.396107	-9.26048
ENSG00000169826	CSGALNACT2	-0.000231809	6.14154	-2.07887	0.0376965	0.396107	-9.26624
ENSG00000227671	RP11-488L18.4	-0.000253234	5.69846	-2.07875	0.0377075	0.396107	-9.25641
ENSG00000109674	NEIL3	-0.000635493	3.47743	-2.07848	0.0377321	0.396107	-9.04962
ENSG00000163536	SERPINI1	-0.000355814	1.52281	-2.07847	0.0377327	0.396107	-8.72814
ENSG00000166750	SLFN5	-0.000254225	7.65142	-2.07773	0.0378015	0.396107	-9.25808
ENSG00000253616	RP11-875O11.3	0.000436462	1.57245	2.0777	0.0378043	0.396107	-8.73903
ENSG00000109618	SEPSECS	-0.000251861	4.8857	-2.07745	0.0378273	0.396107	-9.21532
ENSG00000269837	IPO5P1	0.000236231	3.10301	2.07739	0.0378323	0.396107	-8.98169
ENSG00000187790	FANCM	-0.000301064	3.75025	-2.07643	0.037921	0.396512	-9.09017
ENSG00000113719	ERGIC1	0.000241255	7.31528	2.07632	0.0379315	0.396512	-9.26675
ENSG00000267312	RP11-1094M14.7	-0.000536859	1.38448	-2.07533	0.0380234	0.397157	-8.71241
ENSG00000091972	CD200	0.00060372	1.70026	2.07496	0.0380571	0.397193	-8.76149
ENSG00000145335	SNCA	-0.000625548	9.70213	-2.07441	0.0381084	0.397412	-9.20463
ENSG00000085491	SLC25A24	-0.000262148	5.36006	-2.07308	0.0382322	0.398185	-9.25515
ENSG00000167333	TRIM68	0.000167981	3.2689	2.07294	0.0382448	0.398185	-9.02077
ENSG00000121621	KIF18A	-0.000487822	1.40237	-2.07264	0.0382736	0.398185	-8.72144
ENSG00000150401	DCUN1D2	0.00016132	3.49996	2.07179	0.0383523	0.398318	-9.06286
ENSG00000196943	NOP9	0.000172213	5.16581	2.07178	0.0383537	0.398318	-9.2459
ENSG00000136250	AOAH	0.000204106	7.48433	2.07152	0.0383775	0.398318	-9.27427
ENSG00000109943	CRTAM	-0.000444704	2.56354	-2.07087	0.0384388	0.398639	-8.91342
ENSG00000114013	CD86	0.000239389	5.44645	2.06994	0.0385253	0.399221	-9.26443
ENSG00000100568	VTI1B	-0.000275557	6.60795	-2.06925	0.0385906	0.399479	-9.28853
ENSG00000140598	EFTUD1	0.000150813	4.4353	2.06901	0.0386127	0.399479	-9.19139
ENSG00000136560	TANK	-0.000211935	6.79606	-2.06853	0.0386577	0.399479	-9.28939
ENSG00000149294	NCAM1	0.000472589	3.26091	2.06838	0.038672	0.399479	-9.02767
ENSG00000211785	TRAV12-1	0.000441074	1.29601	2.06741	0.0387629	0.400103	-8.7183
ENSG00000181894	ZNF329	0.000235126	3.63288	2.06645	0.0388537	0.400618	-9.0921
ENSG00000089248	ERP29	0.000246575	5.58361	2.06536	0.0389566	0.400618	-9.27958
ENSG00000271918	CTD-2287O16.5	0.000352127	0.701834	2.06528	0.0389642	0.400618	-8.65732
ENSG00000130713	EXOSC2	0.000169755	4.27799	2.065	0.038991	0.400618	-9.1826
ENSG00000148843	PDCD11	0.000166951	5.05545	2.06484	0.0390056	0.400618	-9.25224
ENSG00000185745	IFIT1	-0.000904871	5.6269	-2.06417	0.0390691	0.400618	-9.28104
ENSG00000141968	VAV1	0.000266594	7.12717	2.06406	0.0390796	0.400618	-9.29544
ENSG00000162607	USP1	-0.000379935	5.53397	-2.06401	0.0390847	0.400618	-9.28083
ENSG00000115306	SPTBN1	0.000215585	7.27352	2.06398	0.0390877	0.400618	-9.29354
ENSG00000118900	UBN1	0.00028968	6.69185	2.06351	0.0391319	0.400713	-9.29875
ENSG00000256269	HMBS	-0.000503134	3.29589	-2.06303	0.0391776	0.400713	-9.04885
ENSG00000167699	GLOD4	0.000159479	4.83544	2.06292	0.0391886	0.400713	-9.24051
ENSG00000180425	C11orf71	-0.00026511	3.10055	-2.06197	0.039279	0.400856	-9.01838
ENSG00000118965	WDR35	-0.000243258	3.73552	-2.06182	0.039293	0.400856	-9.1174
ENSG00000270344	RP11-734K2.4	0.000218297	4.70565	2.06112	0.0393596	0.400856	-9.23399
ENSG00000034677	RNF19A	-0.000207227	6.88987	-2.061	0.0393707	0.400856	-9.30412
ENSG00000147535	PPAPDC1B	0.000306337	3.85443	2.06026	0.0394416	0.400856	-9.13703
ENSG00000121879	PIK3CA	-0.00027879	6.56591	-2.06022	0.0394451	0.400856	-9.3073
ENSG00000034053	APBA2	0.000419272	4.50755	2.05972	0.0394929	0.400856	-9.21263
ENSG00000235162	C12orf75	-0.000352222	3.43983	-2.05919	0.0395438	0.400856	-9.07559
ENSG00000198331	HYLS1	0.000271823	2.24418	2.05916	0.0395469	0.400856	-8.87648
ENSG00000184979	USP18	-0.00067167	1.78146	-2.05831	0.0396286	0.400856	-8.81345
ENSG00000139372	TDG	-0.000212903	4.70246	-2.05831	0.0396286	0.400856	-9.24099
ENSG00000056586	RC3H2	-0.00020475	6.8717	-2.05826	0.0396331	0.400856	-9.31005
ENSG00000205639	MFSD2B	-0.000677176	2.84602	-2.05803	0.039655	0.400856	-8.97595
ENSG00000163328	GPR155	-0.000236541	6.18766	-2.05786	0.0396719	0.400856	-9.31005
ENSG00000115091	ACTR3	-0.00021856	8.86625	-2.05772	0.0396849	0.400856	-9.26556
ENSG00000118707	TGIF2	0.000178836	3.97785	2.05689	0.0397649	0.400856	-9.16275
ENSG00000132465	IGJ	-0.000775232	4.74243	-2.05668	0.0397849	0.400856	-9.24549
ENSG00000171150	SOCS5	-0.000266463	4.30288	-2.05654	0.039799	0.400856	-9.20457
ENSG00000104228	TRIM35	0.000201779	4.81255	2.0563	0.0398221	0.400856	-9.25229
ENSG00000135766	EGLN1	-0.000230314	6.93086	-2.056	0.0398512	0.400856	-9.31335
ENSG00000198087	CD2AP	-0.00031535	5.26276	-2.05544	0.0399049	0.400856	-9.28503
ENSG00000168172	HOOK3	-0.000236388	6.27863	-2.0554	0.0399091	0.400856	-9.3163
ENSG00000117697	NSL1	-0.000177532	5.38564	-2.05486	0.0399613	0.400856	-9.29362
ENSG00000162645	GBP2	-0.000264577	8.51147	-2.05467	0.0399791	0.400856	-9.28357
ENSG00000205559	CHKB-AS1	0.000277073	1.58009	2.05461	0.0399852	0.400856	-8.78415
ENSG00000082898	XPO1	-0.000278887	7.46011	-2.05449	0.039997	0.400856	-9.31017
ENSG00000182240	BACE2	0.000322915	3.29394	2.05392	0.0400518	0.401029	-9.07303
ENSG00000113387	SUB1	-0.000376113	5.75091	-2.05368	0.0400754	0.401029	-9.30996
ENSG00000138686	BBS7	-0.000258725	3.01011	-2.05217	0.0402214	0.401245	-9.02127
ENSG00000265531	FCGR1C	-0.000675879	1.75157	-2.05174	0.0402637	0.401245	-8.82247
ENSG00000153250	RBMS1	-0.000242542	6.89707	-2.05171	0.0402663	0.401245	-9.32337
ENSG00000280378	RP4-758J24.6	0.000370048	0.669906	2.05164	0.0402728	0.401245	-8.67836
ENSG00000173744	AGFG1	-0.000224921	6.85894	-2.05153	0.0402837	0.401245	-9.32395
ENSG00000123575	FAM199X	-0.000292614	5.79045	-2.05113	0.0403232	0.401245	-9.3163
ENSG00000067248	DHX29	-0.000235408	5.06279	-2.05111	0.0403244	0.401245	-9.28323
ENSG00000173614	NMNAT1	0.000185746	3.79822	2.05079	0.0403562	0.401245	-9.15285
ENSG00000081154	PCNP	-0.000359736	5.64658	-2.05062	0.0403722	0.401245	-9.31267
ENSG00000177683	THAP5	-0.000378652	5.0783	-2.04934	0.0404976	0.401372	-9.28822
ENSG00000105136	ZNF419	0.000187094	3.70007	2.04914	0.0405171	0.401372	-9.13817
ENSG00000278463	HIST1H2AB	-0.000645466	1.1329	-2.04864	0.0405661	0.401372	-8.74245
ENSG00000169224	GCSAML	-0.00073171	1.1523	-2.0485	0.0405794	0.401372	-8.73785
ENSG00000135862	LAMC1	0.000467257	2.22206	2.04844	0.0405854	0.401372	-8.89507
ENSG00000144848	ATG3	-0.000238006	5.8566	-2.04832	0.0405973	0.401372	-9.32411
ENSG00000010072	SPRTN	-0.000195583	4.43643	-2.04806	0.0406228	0.401372	-9.23673
ENSG00000151576	QTRTD1	0.000152087	4.80282	2.04799	0.0406298	0.401372	-9.27016
ENSG00000167523	SPATA33	0.000288424	1.43197	2.04747	0.0406808	0.401573	-8.77599
ENSG00000104388	RAB2A	-0.000246616	5.87706	-2.0469	0.0407369	0.401769	-9.32766
ENSG00000229474	PATL2	-0.000347436	4.41442	-2.04664	0.0407618	0.401769	-9.23239
ENSG00000285796		0.000247075	3.69823	2.04611	0.0408145	0.401986	-9.14572
ENSG00000079739	PGM1	0.000200721	4.52499	2.04531	0.040893	0.402069	-9.2508
ENSG00000146263	MMS22L	-0.000266318	4.47262	-2.04519	0.0409045	0.402069	-9.24437
ENSG00000116918	TSNAX	-0.000290329	5.569	-2.04484	0.0409391	0.402069	-9.3226
ENSG00000006432	MAP3K9	0.000399366	1.75451	2.04478	0.0409455	0.402069	-8.82967
ENSG00000172667	ZMAT3	-0.000279482	5.50597	-2.04436	0.0409868	0.402173	-9.31945
ENSG00000198846	TOX	-0.000373547	1.86544	-2.04221	0.0412	0.403863	-8.8521
ENSG00000128989	ARPP19	-0.000254482	6.97885	-2.04155	0.0412649	0.403863	-9.3433
ENSG00000132670	PTPRA	-0.000198318	5.80437	-2.04141	0.0412791	0.403863	-9.33661
ENSG00000130787	HIP1R	0.000511881	4.45818	2.0412	0.0412998	0.403863	-9.24553
ENSG00000241399	CD302	-0.000336186	6.69832	-2.04107	0.0413129	0.403863	-9.34506
ENSG00000171291	ZNF439	0.000292033	4.11923	2.04073	0.0413472	0.403897	-9.2123
ENSG00000222041	LINC00152	-0.000273714	5.15729	-2.03946	0.0414731	0.404826	-9.31409
ENSG00000026652	AGPAT4	0.000252749	5.16514	2.03913	0.0415064	0.40485	-9.31281
ENSG00000113194	FAF2	0.000126457	5.32138	2.03795	0.0416245	0.404997	-9.32497
ENSG00000138646	HERC5	-0.00067074	5.32531	-2.03748	0.0416711	0.404997	-9.32359
ENSG00000144746	ARL6IP5	-0.000251848	7.33269	-2.03721	0.0416979	0.404997	-9.34761
ENSG00000168876	ANKRD49	-0.00037472	4.65773	-2.03721	0.0416982	0.404997	-9.27958
ENSG00000175087	PDIK1L	-0.000334751	3.61477	-2.03718	0.0417013	0.404997	-9.15197
ENSG00000164603	C7orf60	-0.000310977	4.79533	-2.03656	0.0417632	0.404997	-9.29355
ENSG00000139131	YARS2	0.000164911	3.81745	2.03598	0.0418214	0.404997	-9.18271
ENSG00000107242	PIP5K1B	-0.000352808	3.47402	-2.03563	0.0418572	0.404997	-9.1346
ENSG00000106560	GIMAP2	-0.000387153	5.50366	-2.03529	0.0418915	0.404997	-9.33889
ENSG00000254999	BRK1	-0.000217723	5.48655	-2.03521	0.0418991	0.404997	-9.33867
ENSG00000161956	SENP3	0.000235057	4.134	2.03518	0.041902	0.404997	-9.22826
ENSG00000196363	WDR5	0.000182048	3.58447	2.03512	0.0419079	0.404997	-9.15104
ENSG00000178917	ZNF852	0.000206046	3.86021	2.03465	0.0419558	0.404997	-9.19204
ENSG00000101412	E2F1	-0.000546621	1.00777	-2.0343	0.0419903	0.404997	-8.75533
ENSG00000162367	TAL1	-0.000551406	5.21987	-2.03424	0.0419971	0.404997	-9.32379
ENSG00000109320	NFKB1	0.000168192	6.64419	2.03405	0.0420155	0.404997	-9.36069
ENSG00000133193	FAM104A	-0.000467315	7.21376	-2.03366	0.0420553	0.405063	-9.35613
ENSG00000165733	BMS1	0.000170592	5.22813	2.03321	0.042101	0.405063	-9.32708
ENSG00000160193	WDR4	0.000391309	2.33416	2.03248	0.0421747	0.405063	-8.94499
ENSG00000109519	GRPEL1	0.000157365	4.46491	2.03178	0.0422459	0.405063	-9.27228
ENSG00000135587	SMPD2	0.000314901	2.82627	2.0315	0.0422735	0.405063	-9.03131
ENSG00000067369	TP53BP1	0.000162732	5.53798	2.03146	0.0422776	0.405063	-9.34695
ENSG00000205810	KLRC3	-0.000699876	1.59526	-2.03134	0.0422902	0.405063	-8.84524
ENSG00000075407	ZNF37A	-0.000275752	5.26632	-2.03125	0.0422992	0.405063	-9.33396
ENSG00000187650	VMAC	0.000266418	3.16604	2.03104	0.0423208	0.405063	-9.08967
ENSG00000182247	UBE2E2	0.000257699	2.04075	2.0306	0.0423649	0.405063	-8.90296
ENSG00000125459	MSTO1	0.000215376	3.31435	2.03037	0.042389	0.405063	-9.11558
ENSG00000162368	CMPK1	-0.000359584	6.07534	-2.03008	0.0424175	0.405063	-9.36485
ENSG00000172575	RASGRP1	-0.000210341	6.34269	-2.03002	0.0424237	0.405063	-9.36604
ENSG00000235527	HIPK1-AS1	-0.00040132	0.671708	-2.02911	0.0425166	0.405655	-8.72602
ENSG00000204934	ATP6V0E2-AS1	0.000407117	1.59366	2.02871	0.0425578	0.405753	-8.83842
ENSG00000115310	RTN4	-0.00019475	6.09192	-2.02823	0.0426064	0.405921	-9.36963
ENSG00000134108	ARL8B	-0.000269491	5.85763	-2.02758	0.0426733	0.406259	-9.36634
ENSG00000121152	NCAPH	-0.000398145	0.903672	-2.02699	0.0427329	0.406259	-8.75477
ENSG00000144152	FBLN7	0.000487282	1.36452	2.02697	0.0427348	0.406259	-8.80858
ENSG00000100721	TCL1A	0.00074329	4.18145	2.02615	0.0428191	0.406766	-9.24155
ENSG00000136811	ODF2	0.000165864	4.26965	2.02575	0.0428607	0.406867	-9.26291
ENSG00000116473	RAP1A	-0.000262551	6.13852	-2.02514	0.0429227	0.40716	-9.37649
ENSG00000211795	TRAV8-6	-0.000396556	1.24711	-2.02307	0.0431361	0.408861	-8.80194
ENSG00000101017	CD40	0.000339142	2.67678	2.02246	0.0431991	0.408861	-9.02074
ENSG00000198721	ECI2	0.000164492	4.16982	2.02229	0.0432168	0.408861	-9.25611
ENSG00000059377	TBXAS1	0.000183551	7.48533	2.02209	0.0432373	0.408861	-9.37473
ENSG00000171862	PTEN	-0.000284048	9.08439	-2.02189	0.0432578	0.408861	-9.33124
ENSG00000198015	MRPL42	-0.000278086	4.85326	-2.0206	0.0433917	0.40936	-9.32847
ENSG00000251474	RPL32P3	0.000187624	4.86003	2.02048	0.0434035	0.40936	-9.33091
ENSG00000233560	KRT8P39	0.000381792	0.616337	2.02041	0.0434106	0.40936	-8.74029
ENSG00000100532	CGRRF1	-0.000341998	2.98293	-2.02002	0.0434514	0.40936	-9.0841
ENSG00000057657	PRDM1	-0.000268939	4.60592	-2.01964	0.0434912	0.40936	-9.31111
ENSG00000169919	GUSB	0.000205019	4.53498	2.01934	0.0435224	0.40936	-9.30579
ENSG00000184445	KNTC1	-0.00021265	5.14116	-2.01909	0.0435486	0.40936	-9.35178
ENSG00000179454	KLHL28	-0.000278462	5.63211	-2.018	0.0436619	0.40936	-9.37846
ENSG00000161533	ACOX1	0.000234895	7.34846	2.01794	0.0436675	0.40936	-9.38541
ENSG00000145780	FEM1C	-0.000267957	5.48457	-2.01785	0.0436768	0.40936	-9.3736
ENSG00000058600	POLR3E	0.000194768	4.84464	2.01737	0.0437275	0.40936	-9.33382
ENSG00000008517	IL32	-0.00032364	4.66439	-2.01736	0.0437279	0.40936	-9.31647
ENSG00000182400	TRAPPC6B	-0.00027671	4.874	-2.01726	0.0437387	0.40936	-9.33861
ENSG00000104177	MYEF2	-0.000406031	3.03664	-2.01718	0.0437474	0.40936	-9.10351
ENSG00000111846	GCNT2	-0.00027552	3.71381	-2.01687	0.0437793	0.409367	-9.20862
ENSG00000100991	TRPC4AP	0.000130778	6.58316	2.01651	0.0438169	0.409426	-9.3963
ENSG00000009954	BAZ1B	0.000144455	6.24488	2.01568	0.0439041	0.409466	-9.39591
ENSG00000197713	RPE	-0.000275304	5.26479	-2.01566	0.0439063	0.409466	-9.36556
ENSG00000164332	UBLCP1	-0.000306667	4.75523	-2.01555	0.0439172	0.409466	-9.33319
ENSG00000112406	HECA	-0.000173607	7.70474	-2.01501	0.0439737	0.409466	-9.38544
ENSG00000115365	LANCL1	-0.000247996	4.97855	-2.01498	0.0439773	0.409466	-9.34782
ENSG00000123992	DNPEP	0.000273439	4.24387	2.0144	0.0440381	0.409742	-9.28247
ENSG00000181751	C5orf30	-0.000287178	2.55364	-2.01391	0.0440893	0.409928	-9.02158
ENSG00000178691	SUZ12	-0.000294105	5.3512	-2.01307	0.0441777	0.410459	-9.37702
ENSG00000162599	NFIA	-0.000352044	5.23907	-2.01213	0.0442767	0.410519	-9.37266
ENSG00000185345	PARK2	0.000356785	1.54996	2.01197	0.0442936	0.410519	-8.86489
ENSG00000101751	POLI	-0.000255759	4.89263	-2.01189	0.0443022	0.410519	-9.35077
ENSG00000136444	RSAD1	0.000198087	4.31033	2.01182	0.0443094	0.410519	-9.29354
ENSG00000169764	UGP2	-0.000228306	5.93204	-2.01151	0.044342	0.410531	-9.40052
ENSG00000119969	HELLS	-0.000341758	3.17792	-2.01112	0.0443831	0.410622	-9.13276
ENSG00000276644	DACH1	-0.000306126	1.98349	-2.01043	0.0444558	0.411005	-8.94794
ENSG00000169032	MAP2K1	0.000151901	5.38156	2.00999	0.0445027	0.411148	-9.38452
ENSG00000178202	KDELC2	-0.000265223	2.83057	-2.0091	0.0445969	0.411729	-9.07677
ENSG00000008853	RHOBTB2	0.000390732	2.35998	2.00663	0.0448601	0.412957	-9.00366
ENSG00000278897	AC020951.1	0.000323874	2.82673	2.00645	0.0448793	0.412957	-9.08038
ENSG00000197162	ZNF785	0.000240006	2.56501	2.00642	0.0448818	0.412957	-9.0365
ENSG00000154764	WNT7A	0.00051556	1.10593	2.00629	0.044896	0.412957	-8.82061
ENSG00000160131	VMA21	-0.000299938	5.14309	-2.0061	0.0449164	0.412957	-9.37809
ENSG00000156162	DPY19L4	-0.000350108	3.67435	-2.00599	0.0449278	0.412957	-9.22204
ENSG00000242852	ZNF709	-0.000878748	2.16239	-2.00578	0.0449502	0.412957	-8.97257
ENSG00000177646	ACAD9	0.000168044	4.87661	2.00516	0.0450173	0.413216	-9.36136
ENSG00000188596	CFAP54	-0.000352762	1.58909	-2.00493	0.0450414	0.413216	-8.885
ENSG00000152942	RAD17	-0.000261822	4.27462	-2.00381	0.0451611	0.414024	-9.30746
ENSG00000187325	TAF9B	-0.0003741	2.41933	-2.00346	0.0451991	0.414083	-9.02004
ENSG00000183735	TBK1	-0.000262457	5.6762	-2.00244	0.045309	0.4148	-9.41206
ENSG00000129351	ILF3	0.000179795	6.84693	2.00194	0.0453625	0.414917	-9.42401
ENSG00000276023	DUSP14	0.000351443	1.13784	2.00165	0.045394	0.414917	-8.83155
ENSG00000081087	OSTM1	-0.000268487	5.90398	-2.00037	0.045532	0.414917	-9.42235
ENSG00000125650	PSPN	0.000315305	1.08745	1.99971	0.0456029	0.414917	-8.82558
ENSG00000250696	RP11-704M14.1	-0.000600131	2.51611	-1.99969	0.0456049	0.414917	-9.06062
ENSG00000272054	RP11-423P10.2	-0.00046392	1.80857	-1.99957	0.0456178	0.414917	-8.9287
ENSG00000089060	SLC8B1	0.000281662	5.03536	1.99953	0.0456218	0.414917	-9.38633
ENSG00000171051	FPR1	0.000297797	9.14613	1.99953	0.0456222	0.414917	-9.37435
ENSG00000134333	LDHA	-0.000205616	6.55296	-1.99919	0.0456589	0.414917	-9.43096
ENSG00000180008	SOCS4	-0.000336422	5.30103	-1.99912	0.0456668	0.414917	-9.40178
ENSG00000143179	UCK2	0.000201271	3.06388	1.99909	0.0456697	0.414917	-9.139
ENSG00000075914	EXOSC7	0.00015889	3.60784	1.99851	0.0457324	0.4152	-9.22696
ENSG00000100413	POLR3H	0.00030855	3.77439	1.99716	0.0458795	0.416246	-9.25329
ENSG00000138678	AGPAT9	0.000257729	5.4136	1.9967	0.0459293	0.416246	-9.40981
ENSG00000109917	ZPR1	0.000139351	4.80993	1.99657	0.0459429	0.416246	-9.37326
ENSG00000151332	MBIP	-0.00029777	2.924	-1.99605	0.0459993	0.416448	-9.12186
ENSG00000155926	SLA	0.000176063	8.67911	1.99579	0.0460287	0.416448	-9.39684
ENSG00000168438	CDC40	-0.000230161	5.8047	-1.99542	0.046068	0.416517	-9.4296
ENSG00000129515	SNX6	-0.000247789	6.33094	-1.99439	0.0461806	0.417248	-9.44012
ENSG00000104164	BLOC1S6	-0.000216287	6.36314	-1.9934	0.0462896	0.417563	-9.44204
ENSG00000277632	CCL3	-0.000503107	1.03317	-1.99319	0.0463123	0.417563	-8.8331
ENSG00000136819	C9orf78	-0.000525513	7.49706	-1.99292	0.0463415	0.417563	-9.43329
ENSG00000153064	BANK1	0.000433609	5.43554	1.99161	0.0464855	0.417563	-9.41609
ENSG00000166947	EPB42	-0.000711893	6.8367	-1.99158	0.0464891	0.417563	-9.44357
ENSG00000163946	FAM208A	-0.000235603	7.06434	-1.99153	0.0464939	0.417563	-9.44305
ENSG00000163798	SLC4A1AP	0.000138067	4.7773	1.99146	0.0465014	0.417563	-9.38222
ENSG00000139168	ZCRB1	-0.000235147	3.38178	-1.99128	0.0465216	0.417563	-9.20798
ENSG00000131931	THAP1	-0.000251582	3.37485	-1.99114	0.0465369	0.417563	-9.20717
ENSG00000215190	LINC00680	0.000191468	3.13783	1.9909	0.046563	0.417563	-9.16465
ENSG00000088035	ALG6	-0.000305312	4.41599	-1.99088	0.0465657	0.417563	-9.34876
ENSG00000153975	ZUFSP	-0.000297917	3.21307	-1.99058	0.0465984	0.417572	-9.18157
ENSG00000148399	DPH7	0.000226755	3.65143	1.98955	0.0467117	0.417708	-9.25184
ENSG00000101384	JAG1	0.000241296	2.48049	1.98936	0.046733	0.417708	-9.06336
ENSG00000125148	MT2A	-0.000596384	3.03094	-1.98932	0.0467375	0.417708	-9.14848
ENSG00000125772	GPCPD1	-0.00025793	7.94948	-1.98929	0.046741	0.417708	-9.43057
ENSG00000147679	UTP23	-0.000268039	4.45304	-1.9887	0.0468065	0.418008	-9.35689
ENSG00000139921	TMX1	-0.000364985	5.25995	-1.98805	0.0468775	0.418358	-9.42286
ENSG00000107551	RASSF4	0.000234859	5.53211	1.98708	0.0469856	0.418758	-9.43624
ENSG00000160194	NDUFV3	0.000134081	4.79462	1.98707	0.0469861	0.418758	-9.3926
ENSG00000151348	EXT2	0.000124949	5.38575	1.98658	0.0470408	0.418803	-9.43029
ENSG00000117318	ID3	0.000518229	1.98155	1.98645	0.047055	0.418803	-8.98448
ENSG00000204323	SMIM5	-0.000678642	3.76511	-1.9859	0.0471166	0.419066	-9.26938
ENSG00000151151	IPMK	-0.000358364	6.12153	-1.98483	0.0472352	0.419831	-9.4554
ENSG00000205707	LYRM5	-0.000446752	2.51214	-1.98455	0.0472666	0.419831	-9.07015
ENSG00000105516	DBP	0.000305447	3.54068	1.9837	0.047361	0.420288	-9.24707
ENSG00000196792	STRN3	-0.000208611	4.7719	-1.98351	0.0473822	0.420288	-9.39822
ENSG00000021574	SPAST	-0.00026775	5.59748	-1.9826	0.0474842	0.420372	-9.44878
ENSG00000253981	ALG1L13P	0.000394243	2.72865	1.98258	0.0474864	0.420372	-9.12011
ENSG00000223768	LINC00205	0.00022136	4.06702	1.98257	0.0474877	0.420372	-9.32441
ENSG00000230373	GOLGA6L5P	-0.000492158	1.64043	-1.9821	0.0475401	0.420387	-8.94138
ENSG00000030419	IKZF2	-0.000338552	5.9598	-1.98174	0.0475804	0.420387	-9.45807
ENSG00000107201	DDX58	-0.000348974	7.38775	-1.98124	0.0476366	0.420387	-9.45935
ENSG00000275004	ZNF280B	-0.000346389	0.914595	-1.98106	0.0476564	0.420387	-8.85144
ENSG00000001497	LAS1L	0.000154873	4.3919	1.98082	0.0476839	0.420387	-9.36471
ENSG00000179119	SPTY2D1	-0.000166787	5.18787	-1.9808	0.047686	0.420387	-9.43278
ENSG00000143479	DYRK3	-0.000615629	2.32856	-1.98055	0.0477137	0.420387	-9.05343
ENSG00000176533	GNG7	0.000360102	2.51689	1.97845	0.04795	0.421616	-9.08245
ENSG00000139977	NAA30	-0.000277088	4.62368	-1.97814	0.0479846	0.421616	-9.39341
ENSG00000273066	RP11-216L13.19	0.000263596	1.26959	1.97809	0.0479913	0.421616	-8.89344
ENSG00000180340	FZD2	0.000476949	1.48361	1.97785	0.0480176	0.421616	-8.92814
ENSG00000156802	ATAD2	-0.000246824	4.62759	-1.97712	0.0481001	0.421616	-9.39699
ENSG00000108591	DRG2	0.000212164	4.21743	1.97704	0.0481098	0.421616	-9.35374
ENSG00000004939	SLC4A1	-0.000757188	8.64627	-1.97696	0.0481181	0.421616	-9.43563
ENSG00000113721	PDGFRB	-0.000609802	1.11453	-1.9768	0.0481368	0.421616	-8.88681
ENSG00000154582	TCEB1	-0.000262165	3.26026	-1.97674	0.0481431	0.421616	-9.2173
ENSG00000113319	RASGRF2	0.00026477	4.87981	1.97575	0.0482558	0.421616	-9.4159
ENSG00000162775	RBM15	0.000142595	6.05352	1.97568	0.0482628	0.421616	-9.47366
ENSG00000115419	GLS	-0.000278249	7.24876	-1.97551	0.0482823	0.421616	-9.47231
ENSG00000132912	DCTN4	-0.000181632	5.78444	-1.97546	0.0482887	0.421616	-9.46893
ENSG00000011422	PLAUR	0.000308896	5.49484	1.97495	0.0483463	0.421616	-9.45539
ENSG00000285999		0.000265262	2.71811	1.97453	0.0483933	0.421616	-9.12729
ENSG00000196116	TDRD7	-0.000228803	5.40577	-1.97445	0.0484025	0.421616	-9.45666
ENSG00000246898	LINC00920	-0.000508734	1.08054	-1.9744	0.0484088	0.421616	-8.87912
ENSG00000155465	SLC7A7	0.000185479	6.33415	1.9742	0.0484317	0.421616	-9.47905
ENSG00000163428	LRRC58	-0.000306085	5.65115	-1.97387	0.0484687	0.421643	-9.4668
ENSG00000001630	CYP51A1	-0.000268516	3.72225	-1.9736	0.0484991	0.421643	-9.29565
ENSG00000112144	ICK	-0.000169479	4.2596	-1.97278	0.0485935	0.422184	-9.3676
ENSG00000135960	EDAR	0.000592028	1.39936	1.97139	0.0487521	0.422457	-8.92045
ENSG00000165943	MOAP1	0.000172114	4.59598	1.97124	0.0487688	0.422457	-9.40562
ENSG00000182093	WRB	-0.000259515	3.62939	-1.97089	0.0488093	0.422457	-9.28637
ENSG00000244026	FAM86DP	0.000429296	1.26641	1.97026	0.0488808	0.422457	-8.91091
ENSG00000186834	HEXIM1	-0.00020502	4.88418	-1.9702	0.0488877	0.422457	-9.43382
ENSG00000183474	GTF2H2C	-0.000253256	4.82564	-1.97014	0.0488954	0.422457	-9.42906
ENSG00000148943	LIN7C	-0.000353692	5.16858	-1.96996	0.0489152	0.422457	-9.45204
ENSG00000161835	GRASP	0.000473127	0.863566	1.9696	0.0489564	0.422457	-8.86573
ENSG00000163935	SFMBT1	0.000197955	3.99028	1.96949	0.0489699	0.422457	-9.33758
ENSG00000143924	EML4	-0.000177316	7.33903	-1.9694	0.0489803	0.422457	-9.48318
ENSG00000139289	PHLDA1	-0.000366522	1.7368	-1.96922	0.0490009	0.422457	-8.97832
ENSG00000205056	RP11-693J15.5	0.000559563	3.99035	1.96913	0.0490113	0.422457	-9.33255
ENSG00000237772	AC092620.3	0.000312521	2.52739	1.9688	0.0490482	0.422498	-9.10855
ENSG00000007923	DNAJC11	0.000185453	3.75784	1.96848	0.0490855	0.422541	-9.30945
ENSG00000234585	CCT6P3	-0.000279768	3.24558	-1.96755	0.0491925	0.423185	-9.23092
ENSG00000101546	RBFA	0.000203569	2.79134	1.96593	0.0493794	0.423365	-9.15607
ENSG00000023608	SNAPC1	-0.000415924	1.9699	-1.96576	0.0493989	0.423365	-9.0219
ENSG00000257594	GALNT4	-0.000321901	4.97922	-1.96523	0.0494609	0.423365	-9.45021
ENSG00000184613	NELL2	0.000348286	5.87541	1.96517	0.0494669	0.423365	-9.48553
ENSG00000154016	GRAP	0.000423067	4.40826	1.96517	0.0494671	0.423365	-9.39405
ENSG00000102145	GATA1	-0.000668252	4.35183	-1.96515	0.0494695	0.423365	-9.39244
ENSG00000142632	ARHGEF19	0.000446215	1.0569	1.96484	0.0495054	0.423365	-8.89428
ENSG00000166582	CENPV	0.000342136	0.898266	1.96465	0.0495277	0.423365	-8.88025
ENSG00000061936	SFSWAP	0.000117678	6.00941	1.96457	0.0495372	0.423365	-9.49474
ENSG00000147894	C9orf72	-0.000309429	7.32835	-1.96449	0.0495467	0.423365	-9.49273
ENSG00000138964	PARVG	0.000253978	6.85065	1.96372	0.0496357	0.423365	-9.50011
ENSG00000054392	HHAT	0.000285807	2.387	1.96319	0.0496966	0.423365	-9.09513
ENSG00000122642	FKBP9	0.000364281	1.44613	1.96317	0.0496991	0.423365	-8.95498
ENSG00000260032	LINC00657	-0.000226649	8.03827	-1.9631	0.0497072	0.423365	-9.4803
ENSG00000095787	WAC	-0.00016812	7.67146	-1.96276	0.0497469	0.423365	-9.48998
ENSG00000267575	CTC-459F4.3	0.00016559	4.10417	1.96186	0.0498521	0.423365	-9.37039
ENSG00000241489	IDS	0.000388929	4.69083	1.96164	0.0498769	0.423365	-9.43375
ENSG00000160218	TRAPPC10	0.000127802	6.78308	1.96152	0.0498913	0.423365	-9.50492
ENSG00000168275	COA6	-0.000342673	1.92232	-1.9614	0.0499049	0.423365	-9.0235
ENSG00000256646	PSMA2	0.000945058	3.02387	1.96085	0.0499699	0.423365	-9.21236

[truncated: 2 more sheets: ST9_GS_Phase2_3, ST10_GS_Phase1_3]
